# Supplementary material for: School self-efficacy is affected by gender and motor skills: findings from an Italian study
Source: PeerJ. 2020 Apr 29;8:e8949. doi: 10.7717/peerj.8949 (PMC7195827; doi:10.7717/peerj.8949)
Supplement: Supplemental Information 2 [file peerj-08-8949-s002.xls]

## Sheet: Sheet1
									Q1	Q2	Q3	Q4	Q5	Q6	Q7	Q8	Q9	Q10	Q11	Q12
id	Height (cm)	Weight (kg)	Age (years)	Sex(F/M)	BMI classes (*)	6MWT (m)	SBJ (cm)	4x10 (s)	Finish up your homework timely	Get committed in studying when you have other interesting things to do	Get focused on the studying without distractions	Taking notes during teacher’s lecturing	Doing committed research by means of supplementary materials (library-, home-books)	Get organized in running scholastic activities	Planning scholastic activities	Remember what teacher taught or what you read from books	Find a spot where studying without distractions	Get interested in scholastic matters	Meet your parents’expectations on your achievements	Meet your teachers’ requests
id	altezza (cm)	peso (kg)	anni/mesi	sesso	peso	6MWT (m tot)	SBJ best (cm)	SRT x 10m bests	finire in tempo i compiti che ti sono stati asseganti per casa	Impegnarti nello studio quando hai altre cose interessanti da fare	Concentrarti nello studio senza farti distrarre	Prendere appunti delle spiegazioni dell’insegnante	Fare ricerche che ti vengono assegnate utilizzando altri libri (che puoi trovare a casa, in biblioteca ecc.)	Organizzarti nello svolgimento delle attività scolastiche	Programmare le tue attività scolastiche	Ricordare ciò che l’insegnate ha spiegato in classe e ciò che hai letto sui libri	Trovarti un posto dove studiare senza essere distratto	Interessarti alla materie scolastiche	Soddisfare i desideri dei tuoi genitori su ciò che si aspettano da te	Soddisfare le richieste dei tuoi insegnanti	selfeffSCORE_SUM	Thresholds_SE_score_sum			(*) BMI classes
1	141	33.7	8.9	F	NW	590	108	16.77	5	4	4	5	5	4	4	4	2	5	4	5	51	3			NW	normalweight
2	149	46.8	11.3	F	NW	713	150	12.36	4	4	4	2	5	4	5	4	5	5	5	4	51	3			OW	overweight
3	130.5	32	8	F	OW	642	110	15.98	4	4	5	3	5	5	4	4	5	4	4	4	51	3			OB	obese
4	138	30	11.1	F	NW	892	149	12.87	3	4	4	3	2	4	3	4	5	4	3	4	43	2			UW	underweight
5	128	27	9.8	F	NW	710	126	13	3	4	3	2	4	3	4	5	5	5	5	4	47	3
6	125	26	7.3	F	NW	468	114	13.5	4	3	3	1	1	3	3	4	3	3	4	4	36	1
7	130	28	8.4	F	NW	573	114	12.94	3	2	2	3	3	2	4	3	3	4	3	3	35	1
8	131	30	8.3	F	NW	612	95	16.3	5	5	4	5	1	4	5	4	5	5	5	5	53	3
9	128.5	28	8.6	F	NW	643	130	14	2	2	2	1	2	2	3	1	3	2	2	2	24	1
10	128	25.7	7.8	F	NW	586	95	18.7	5	5	2	1	1	4	4	4	4	5	5	5	45	3
11	139	50	9.7	F	OB	661	110	14.14	5	4	4	5	3	3	4	5	4	5	4	5	51	3
12	136	31	8.3	F	NW	678	110	14.8	4	1	4	5	1	5	4	5	1	5	5	5	45	3
13	142	33.4	8.3	F	NW	658	117	15.58	5	4	2	1	1	4	5	5	5	4	5	5	46	3
14	135	35	8.9	F	OW	532	128	13.88	5	5	3	1	1	5	1	5	3	5	5	5	44	2
15	125.5	25	8.9	F	NW	466	127	14.2	5	3	2	4	4	5	4	5	3	5	4	4	48	3
16	131	27	8.5	F	NW	662	132	15.46	3	3	3	4	3	3	3	3	3	3	2	4	37	1
17	119	25	6.3	F	OW	584	109	14	4	4	4	1	1	5	5	4	5	5	3	3	44	2
18	123	20	8.1	F	UW	652	106	16.11	4	3	2	1	1	3	3	5	5	5	5	5	42	2
19	126	26	10.3	F	NW	694	130	12.5	5	4	4	1	2	3	2	2	2	4	5	5	39	1
20	137	30	8.8	F	NW	650	124	15	3	5	3	1	1	1	1	1	1	5	5	3	30	1
21	135	44	9.7	F	OB	647	113	13.56	5	4	3	5	1	4	5	4	3	4	4	4	46	3
22	140	30	9.9	F	NW	647	119	12.97	4	3	2	3	3	4	4	3	4	4	5	4	43	2
23	130	26	9.7	F	NW	588	115	13.72	3	1	2	2	5	4	4	3	4	4	3	3	38	1
24	126	23	8.1	F	NW	716	140	15.37	5	4	5	4	3	5	5	4	4	4	5	5	53	3
25	131	26.5	7.7	F	NW	388	80	19.21	4	2	3	1	1	4	4	5	4	5	5	5	43	2
26	123	25	6.5	F	NW	295	97	15.79	5	5	3	1	1	1	1	5	5	5	5	5	42	2
27	133	30	8.3	F	NW	610	95	15.38	3	2	2	1	1	3	2	3	2	3	3	3	28	1
28	120	27.7	6.8	F	OW	573	101	16.26	5	3	2	4	1	5	1	3	5	3	2	5	39	1
29	147	55	11.2	F	OB	653	123	13.51	3	3	3	2	3	3	3	3	4	3	3	4	37	1
30	131	35	7.6	F	OW	561	101	14.9	4	5	2	5	3	5	5	5	4	5	4	5	52	3
31	146	47	10.9	F	OW	650	132	13.4	5	3	3	3	3	4	3	4	2	4	3	3	40	1
32	118	21	7.2	F	NW	580	109	13.8	4	4	5	5	4	5	5	4	5	5	4	5	55	3
33	129	23	8.1	F	UW	504	112	18.67	5	3	4	1	2	1	3	1	4	5	3	3	35	1
34	145	45	8.2	F	OW	638	101	16.91	5	5	4	5	1	5	5	4	5	5	5	5	54	3
35	133	40	10.3	F	OW	754	89	15.5	5	4	4	5	4	4	5	4	4	5	5	4	53	3
36	118	20	6.9	F	NW	560	110	17.35	4	4	3	2	3	3	3	3	4	4	3	3	39	1
37	120	25	7.7	F	NW	640	128	13.1	5	5	2	5	5	5	5	1	5	5	5	5	53	3
38	128	25	7.8	F	NW	510	120	14.31	4	4	3	4	3	5	4	4	3	5	4	4	47	3
39	134	25	8.7	F	UW	620	148	13.21	5	4	3	5	3	5	5	5	2	5	5	5	52	3
40	129	24.1	7.4	F	NW	693	128	12.82	2	3	5	4	4	4	5	4	5	5	1	2	44	2
41	125	28	7.9	F	NW	700	136	11.5	4	3	4	3	4	4	4	3	3	4	4	4	44	2
42	117.5	25	8.1	F	NW	608	116	14.5	4	1	4	2	5	1	4	5	2	5	1	5	39	1
43	134.5	26.1	8.4	F	NW	720	114	12.95	5	4	4	5	4	4	5	4	3	5	5	4	52	3
44	154	38	10.5	F	NW	690	134	13.5	4	5	4	4	3	4	4	5	4	3	4	4	48	3
45	138	36.4	9.8	F	NW	752	177	12.75	5	4	5	5	5	4	4	5	5	5	4	4	55	3
46	141	39	8.8	F	OW	600	131	14.49	4	3	1	4	4	3	4	3	5	3	4	3	41	2
47	126	26	8.3	F	NW	680	110	14.96	4	5	4	5	5	5	3	5	5	5	4	4	54	3
48	135	38.2	8.9	F	OW	616	100	14.15	4	4	4	1	1	4	4	5	2	5	5	5	44	2
49	139	50	8.4	F	OB	564.4	80	16.4	4	2	1	3	5	1	3	3	4	5	2	3	36	1
50	147	30	10.2	F	UW	634	124	13.38	4	2	2	3	3	4	4	3	3	4	4	3	39	1
51	128	26	9.9	F	NW	625	102	13.93	4	3	3	4	4	3	2	4	3	3	2	3	38	1
52	128	27.3	8.6	F	NW	778.1	121	12.92	4	5	3	5	4	5	4	5	5	5	5	5	55	3
53	129	29	10.2	F	NW	702	131	11.7	3	3	4	5	3	5	4	4	5	5	4	5	50	3
54	133	28	10.2	F	NW	604	111	13	4	4	4	1	2	4	4	2	5	4	3	3	40	1
55	130	36.3	8.4	F	OW	658	100	15.47	4	5	3	1	3	5	5	5	4	4	5	4	48	3
56	129	33.5	7.1	F	OW	580	120	13.3	4	3	3	4	3	4	4	4	5	4	4	5	47	3
57	135	25	9	F	UW	670	162	13.5	5	2	4	1	1	3	4	4	3	3	4	3	37	1
58	146	28	9.1	F	UW	580	122	13.71	4	5	3	1	1	5	1	5	5	4	5	5	44	2
59	146.5	39	10.6	F	NW	821	160	12.62	5	3	3	2	5	4	3	5	5	5	4	4	48	3
60	127	25.5	7.8	F	NW	536	107	17.69	5	3	3	1	1	3	3	3	4	3	4	3	36	1
61	124	23	8.1	F	NW	702	126	13.97	4	3	4	4	4	4	3	4	4	5	4	4	47	3
62	126	27	7.8	F	NW	500	87	16.43	5	5	5	1	1	1	1	5	5	5	5	5	44	2
63	130	24	7.7	F	NW	600	145	14.1	4	4	3	5	4	4	5	4	5	5	3	5	51	3
64	141	44	10.3	F	OW	597	116	15.67	4	4	3	4	3	3	3	3	5	4	4	3	43	2
65	126	25.5	8.5	F	NW	582	128	13.3	4	5	4	3	4	5	4	5	4	5	4	4	51	3
66	138	44	10.5	F	OW	782	125	14.5	5	5	4	4	5	5	5	4	4	4	4	5	54	3
67	132	34	9.3	F	OW	660	102	15.24	4	5	3	5	5	4	5	5	3	4	5	4	52	3
68	131	28	8.3	F	NW	600	145	13.44	4	4	2	4	3	5	4	4	4	5	5	4	48	3
69	113	20	6.5	F	NW	466	79	16.5	5	5	4	1	1	5	4	4	3	5	5	4	46	3
70	142	45	10.6	F	OW	629	128	13.36	4	3	4	3	4	4	4	4	3	4	5	4	46	3
71	134	28.2	8.8	F	NW	620	130	17.1	4	3	5	4	4	4	3	5	4	5	4	4	49	3
72	134	34	7.5	F	OW	522	125	15.97	2	5	5	3	4	1	1	2	5	5	3	2	38	1
73	120	22.6	6.7	F	NW	570.5	106	17.29	5	5	4	1	1	3	3	5	5	5	5	5	47	3
74	144	34	11.2	F	NW	856	149	11	5	4	4	3	4	5	5	4	5	5	4	4	52	3
75	140	47	8.4	F	OB	548	127	16.33	2	5	2	1	1	5	5	3	5	5	5	4	43	2
76	120	21	6.6	F	NW	603	109	15.15	4	3	3	5	2	4	3	4	3	4	3	4	42	2
77	135	37	8.3	F	OW	800	99	13.4	5	4	5	4	4	5	3	5	3	5	3	5	51	3
78	125	22	7.9	F	NW	584	105	14.8	5	4	3	4	4	4	5	4	5	4	4	4	50	3
79	138	30	8.9	F	NW	636	105	15.52	5	4	3	5	5	5	4	5	4	5	4	4	53	3
80	139	47	9.4	F	OB	697	123	14.15	3	3	2	3	5	2	2	3	5	3	2	1	34	1
81	122	23.1	7.8	F	NW	600	126	16.28	5	5	4	1	1	5	5	5	5	5	5	5	51	3
82	127	30	8.4	F	NW	668	124	13.83	4	5	4	4	4	5	4	4	5	5	4	5	53	3
83	133	30	7.6	F	NW	626	138	14.84	3	2	2	1	1	5	1	2	5	5	5	4	36	1
84	138	38	9.6	F	OW	647	143	12.8	3	3	2	2	4	3	3	4	1	2	3	2	32	1
85	110	20	7.2	F	NW	525	117	15.6	5	5	4	5	4	5	5	5	5	5	5	5	58	3
86	144	31	9	F	NW	613	111	14.69	5	3	3	4	4	4	4	3	4	4	4	3	45	3
87	128	25	9	F	NW	590	122	13.92	4	5	3	5	1	5	4	5	5	5	5	4	51	3
88	152	35	10.5	F	NW	741	155	13.25	4	5	4	5	5	4	4	3	5	5	5	4	53	3
89	138	35.5	10.8	F	NW	672	139	13.6	4	5	3	4	5	5	4	5	3	5	5	5	53	3
90	135	36	8.8	F	OW	628	105	15.31	3	3	2	1	2	4	3	3	1	5	3	4	34	1
91	127	23	7.6	F	NW	565	133	15.45	5	4	5	2	4	4	4	5	5	5	5	5	53	3
92	128	26.8	8.3	F	NW	592	145	14.51	4	4	5	5	5	5	4	4	4	5	5	5	55	3
93	135	27	8.5	F	NW	625	120	13.6	4	4	5	4	4	4	4	4	5	4	4	5	51	3
94	141	37.3	8.8	F	NW	640	97	18.79	5	5	5	5	5	5	5	5	4	5	5	5	59	3
95	129	37	8.4	F	OB	592	85	14.97	5	3	3	1	1	1	1	3	5	3	5	3	34	1
96	121	20.1	6.5	F	UW	563.5	91	15.24	3	5	3	1	1	5	4	5	5	5	5	5	47	3
97	140	31	10.9	F	NW	800	122	12.3	3	4	3	2	2	3	3	3	4	4	4	3	38	1
98	130	40	8.4	F	OB	563	100	16.16	5	5	4	5	5	5	5	4	5	5	5	5	58	3
99	128	25	10.1	F	NW	757	145	12.54	4	4	4	3	3	5	5	4	4	4	3	5	48	3
100	119	19	7.2	F	UW	564	119	15.41	5	5	4	2	3	5	3	5	4	4	5	5	50	3
101	126	34.1	7.5	F	OB	536	94	19.67	2	2	3	1	1	3	3	3	4	5	5	5	37	1
102	134	42	10.4	F	OW	583	128	13.47	4	3	4	5	3	5	4	4	3	4	4	5	48	3
103	133	29	8.6	F	NW	674	122	14.45	3	4	5	4	5	5	5	5	5	5	5	5	56	3
104	136	33	10.5	F	NW	725	148	11.8	5	4	4	3	3	4	4	4	4	4	4	4	47	3
105	135	26.6	9.8	F	UW	768	113	13.54	3	5	5	3	3	4	5	4	4	3	4	4	47	3
106	146	34	11.3	F	NW	787	142	11.64	5	4	4	3	4	4	5	4	4	3	4	4	48	3
107	118	26	7.2	F	OW	528	78	15.15	5	3	3	3	2	3	2	2	1	3	4	3	34	1
108	129	28.1	8.2	F	NW	608	104	15.01	5	5	3	1	1	4	4	3	4	5	5	4	44	2
109	142.5	30	11.2	F	UW	813	182	11.72	3	2	4	2	3	3	3	3	4	2	5	4	38	1
110	145	45	10.8	F	OW	713	114	15.33	4	3	4	4	4	5	4	4	5	4	5	4	50	3
111	132	25	8.2	F	NW	612	125	15.13	4	4	3	3	4	5	4	4	2	4	4	5	46	3
112	126	25	7.2	F	NW	560	92	18.09	5	4	3	4	4	4	5	4	4	4	5	4	50	3
113	148	42	10.8	F	NW	630	121	13	4	2	3	1	3	4	5	2	4	4	3	3	38	1
114	123	24	6.4	F	NW	570	122	15.12	5	2	2	1	1	2	2	3	3	3	2	3	29	1
115	141	40	8.3	F	OW	417	127	14.83	3	1	5	1	1	1	1	3	5	5	5	5	36	1
116	138	30	10.8	F	NW	763	151	13.1	5	5	4	3	5	4	4	5	4	5	4	4	52	3
117	117	27.4	7	F	OW	573	91	16.22	5	4	4	3	1	5	5	4	4	5	4	5	49	3
118	126.5	25	7.5	F	NW	590	120	15.31	4	5	3	3	3	4	3	5	3	5	5	5	48	3
119	115	22	6.8	F	NW	510	82	17.08	5	4	4	1	1	4	4	5	3	5	5	5	46	3
120	125	24	7.9	F	NW	570	106	15.1	5	4	4	1	1	5	4	4	5	5	5	4	47	3
121	126	25	8.3	F	NW	605	112	15.84	4	5	4	4	5	4	4	4	4	4	4	4	50	3
122	137	42.7	8.8	F	OW	604	119	15.17	5	4	5	1	4	5	5	5	4	5	5	4	52	3
123	169	60.1	10.9	F	OW	765	150	13.41	5	5	5	4	5	5	4	5	5	5	4	5	57	3
124	120	20.6	6.8	F	NW	594	94	16.23	4	4	3	2	4	4	4	4	3	4	3	3	42	2
125	135	30.7	10.7	F	NW	668	142	12.85	4	3	5	4	3	4	5	4	4	3	4	3	46	3
126	143	39	10.8	F	NW	726	123	13	3	3	3	4	4	4	1	2	3	3	3	4	37	1
127	118	19	8.3	F	UW	664	118	13.04	4	4	4	1	1	5	5	5	5	5	5	5	49	3
128	143.5	34.3	10.7	F	NW	771	127	11.79	4	4	4	4	5	4	4	3	5	4	3	3	47	3
129	146	36.8	11.2	F	NW	638	170	13.58	5	5	5	5	2	5	5	5	4	5	5	5	56	3
130	117	24	7	F	NW	534	75	18.13	4	4	4	5	4	4	5	4	4	5	4	5	52	3
131	135	30	8.6	F	NW	725	124	12.9	4	3	4	5	4	4	5	4	5	5	5	3	51	3
132	123	29	7.4	F	OW	616	130	13.1	5	4	4	2	1	5	5	5	4	4	4	4	47	3
133	114	17	6.5	F	UW	527	112	16.38	5	5	5	5	5	5	5	3	4	5	5	4	56	3
134	150	44	10.7	F	NW	720	136	13.1	5	5	4	4	4	4	5	5	4	5	5	5	55	3
135	135	34	9.5	F	NW	650	115	14.35	4	4	4	4	4	5	5	4	4	5	4	4	51	3
136	125	23	6.8	F	NW	373	104	18.44	4	4	5	3	3	3	3	4	5	4	5	5	48	3
137	144.5	35.5	11	F	NW	729.6	130	12.16	5	4	4	3	4	4	3	4	3	3	4	5	46	3
138	127	26	8.9	F	NW	704	128	14.3	4	2	1	2	1	3	5	3	4	4	2	1	32	1
139	130	23.3	8.7	F	UW	682	130	14.11	4	3	5	1	4	4	5	4	5	4	3	4	46	3
140	138	40.5	9.4	F	OW	678	110	15.02	4	3	2	1	2	4	1	3	3	3	3	5	34	1
141	137	33.7	10.7	F	NW	718.1	151	13.21	4	2	3	2	5	5	5	4	5	5	5	4	49	3
142	147	39	10.1	F	NW	738	133	12.5	5	5	5	4	5	5	5	5	4	5	5	5	58	3
143	130	24.8	8.3	F	NW	538	120	15.7	5	5	5	1	1	4	4	5	5	5	5	4	49	3
144	145	52	10.3	F	OW	666	115	13.84	5	4	4	5	5	5	5	5	4	5	5	5	57	3
145	147	46.1	10.8	F	OW	660	108	13.67	5	4	4	4	5	4	4	4	5	4	4	4	51	3
146	126	28	6.8	F	NW	520	85	17	4	4	3	3	3	4	4	4	4	4	3	4	44	2
147	124	22.3	7.1	F	NW	556	102	16.23	5	4	3	2	1	4	2	4	5	4	4	5	43	2
148	139	43	8.8	F	OW	567	110	15.65	4	3	3	5	4	5	5	3	5	4	5	4	50	3
149	140	36	9.2	F	NW	628	130	14.13	5	3	3	1	1	4	1	3	2	4	3	2	32	1
150	133	26.5	9.3	F	NW	732	146	13.19	4	5	4	3	3	4	5	5	4	3	4	3	47	3
151	133	30	7.3	F	NW	560	124	14.4	5	3	5	1	4	2	2	3	4	5	5	4	43	2
152	121	23.4	7.3	F	NW	622	100	15.26	5	5	1	1	1	5	1	5	1	5	1	5	36	1
153	124	23	6.8	F	NW	620	111	14.8	5	4	4	4	4	5	5	5	5	5	4	4	54	3
154	128	42.5	7.6	F	OB	440	95	17.38	4	5	3	4	5	4	3	4	3	3	3	5	46	3
155	132	26	9.8	F	NW	510	115	13.15	4	3	4	4	3	3	3	4	5	4	4	4	45	3
156	124	23.9	9.3	F	NW	588	120	14.35	5	3	3	1	1	4	4	3	4	5	5	5	43	2
157	129	23.4	8.7	F	UW	592	141	14.26	4	3	3	3	4	4	4	4	2	4	3	3	41	2
158	122	22	8.1	F	NW	420	100	15.63	5	5	5	1	1	1	1	5	5	5	5	5	44	2
159	136	27	9.5	F	NW	652	119	14.17	4	3	2	3	2	3	4	5	4	4	4	4	42	2
160	127	23	7.3	F	NW	485	98	15.93	3	3	4	2	2	3	3	3	4	4	4	3	38	1
161	140	37	8.7	F	OW	580	110	13.1	4	2	5	1	1	1	5	5	5	5	4	4	42	2
162	128	37	7	F	OB	632	61	19.8	4	2	3	1	1	2	2	1	3	3	3	3	28	1
163	112	18.5	7.3	F	NW	444	128	14.62	5	2	5	1	1	4	4	5	4	5	5	5	46	3
164	135.5	44	7.6	F	OB	614	86	17.74	5	5	5	5	5	5	5	5	5	5	5	5	60	3
165	117	23.9	6.8	F	NW	568	90	13.07	4	3	3	2	1	5	4	3	3	5	4	4	41	2
166	129	25	8.4	F	NW	680	146	14.39	3	2	1	2	3	2	2	3	4	5	3	3	33	1
167	123	22.5	6.8	F	NW	640	111	15.32	5	5	3	1	1	2	5	4	5	5	5	3	44	2
168	128	25	8.9	F	NW	740	118	13.87	4	4	5	1	3	5	4	5	5	4	5	2	47	3
169	112	20	6.5	F	NW	540	105	17.5	4	4	4	5	3	5	4	5	4	5	4	5	52	3
170	143	40.5	7.4	F	OW	544	108	13.32	3	3	2	1	3	3	2	4	3	3	3	3	33	1
171	143	34.8	11.4	F	NW	630	110	18.36	4	4	5	5	3	5	5	5	4	4	4	5	53	3
172	131	25.9	9.8	F	NW	684	160	12.06	4	4	4	3	5	4	4	5	5	4	5	5	52	3
173	149	33	10.9	F	UW	737	147	13.6	5	5	4	4	5	5	5	5	4	5	4	5	56	3
174	133	30	7.8	F	NW	528	102	15.6	5	5	5	1	5	5	4	5	5	5	5	5	55	3
175	125	29	8.2	F	OW	490	92	17.37	3	3	2	2	2	2	2	1	3	2	2	2	26	1
176	123	28	8.3	F	NW	692	150	13.5	4	4	4	5	4	4	3	4	1	5	5	3	46	3
177	119	24	7.1	F	NW	473	95	15.17	5	5	5	1	1	1	1	5	5	5	5	5	44	2
178	126	24	7.6	F	NW	620	102	13.8	4	4	3	1	1	3	3	4	5	4	4	4	40	1
179	149	36	11.4	F	NW	560	130	13	4	4	4	3	2	4	3	4	4	4	4	4	44	2
180	126	21	7.3	F	UW	548	125	14.12	5	4	5	1	3	5	5	4	5	5	5	5	52	3
181	138	38	9.3	F	OW	525	117	14.16	5	4	4	3	4	5	4	4	3	5	4	4	49	3
182	131.5	30.8	8.7	F	NW	678	99	15.6	4	3	4	5	5	4	5	4	4	5	4	5	52	3
183	141	46	10.3	F	OW	740	85	16.9	5	5	5	5	5	5	5	5	5	5	5	5	60	3
184	120	20	7.5	F	UW	558	127	13.36	5	4	4	3	4	4	3	3	4	4	5	4	47	3
185	143	41.5	10.2	F	OW	673	126	13.99	2	1	2	2	3	2	4	4	2	4	4	4	34	1
186	146	46.4	11.2	F	OW	700	125	13.68	5	5	4	5	5	5	5	5	5	5	4	5	58	3
187	129	38	8.8	F	OB	612	95	16.7	4	4	3	5	5	4	3	4	5	5	5	4	51	3
188	144	32	9.1	F	NW	580	100	12.65	5	3	3	1	1	1	1	5	3	3	3	5	34	1
189	126	21	7.2	F	UW	594	121	15.96	3	3	4	2	1	4	3	3	3	3	4	5	38	1
190	149	66	10.8	F	OB	664	130	14.6	5	4	5	3	4	4	4	5	3	5	5	4	51	3
191	136	30	8.9	F	NW	671	113	13.85	4	4	5	4	5	4	4	4	4	5	5	5	53	3
192	121	23.7	7	F	NW	583	110	14.56	4	3	1	1	1	3	1	4	1	4	3	4	30	1
193	125	25.5	7.2	F	NW	548	100	17.29	4	3	4	3	4	4	3	4	4	4	5	5	47	3
194	143	34.1	10.8	F	NW	646	143	14.06	4	4	5	5	3	4	3	5	5	4	4	5	51	3
195	119	25	6.8	F	NW	590	86	15.2	3	2	2	1	1	3	3	5	5	2	3	5	35	1
196	128	24.6	10.3	F	NW	604	133	14.51	4	4	5	1	4	5	5	4	5	5	5	5	52	3
197	131	25.7	8.2	F	NW	540	100	17.6	5	2	4	1	1	3	3	4	4	5	5	5	42	2
198	127	32	8	F	OW	600	118	14.81	3	1	2	2	2	5	3	3	5	4	3	2	35	1
199	122	22	9.2	F	NW	613	134	13.62	4	4	3	4	3	3	4	3	5	5	4	4	46	3
200	131	30.5	8.5	F	NW	680	135	12.48	5	5	4	4	5	4	4	4	5	5	4	4	53	3
201	151	52	10.8	F	OW	591	95	14.67	5	5	5	4	4	5	4	5	3	4	5	5	54	3
202	126	27	7.8	F	NW	520	132	15.4	5	5	5	5	5	5	5	5	5	5	5	5	60	3
203	143	35.5	10	F	NW	644	113	13.97	4	3	4	4	4	5	4	5	4	5	4	4	50	3
204	139	32.2	9.7	F	NW	552	110	16.47	5	4	3	4	5	5	4	5	4	4	5	4	52	3
205	115	19	7.9	F	NW	623	119	14.1	5	5	4	4	5	3	5	5	5	4	5	4	54	3
206	133	36.8	10	F	OW	670	150	14.4	5	3	4	3	3	4	3	4	4	4	4	4	45	3
207	141	29	10	F	UW	705	147	11.36	5	4	4	5	5	5	5	4	5	5	5	5	57	3
208	158	50	10.4	F	NW	702	130	13.31	5	4	5	3	4	4	4	2	4	4	4	4	47	3
209	129	35	6.3	F	OB	598	110	16.5	3	4	4	3	3	4	3	4	4	4	4	4	44	2
210	117	20	7.8	F	NW	610	120	14.81	4	3	2	1	1	4	1	3	5	3	3	3	33	1
211	148	36.5	9.8	F	NW	741	152	12.53	5	4	5	5	4	5	5	5	4	4	5	4	55	3
212	131	25	8.4	F	NW	609	146	12.34	5	4	4	5	5	4	3	4	5	5	5	5	54	3
213	151	58.3	11.3	F	OW	708	134	12.2	4	4	5	5	5	4	5	4	5	4	4	4	53	3
214	126	30.1	7.5	F	OW	536	136	17.71	5	5	3	1	1	4	4	5	4	5	5	5	47	3
215	125	22	7.5	F	NW	550	105	14.57	3	2	2	1	1	3	2	3	2	3	3	3	28	1
216	133	41.8	9.3	F	OB	644	96	15.59	5	4	4	4	5	4	4	4	4	4	4	4	50	3
217	119	22.3	6.6	F	NW	646	114	16.49	4	4	4	1	1	4	4	4	2	5	3	3	39	1
218	121	20.7	6.8	F	NW	585	87	16.76	4	4	3	1	2	2	1	1	5	1	5	4	33	1
219	126	24	8.2	F	NW	500	120	14.57	4	3	3	1	1	3	2	4	1	4	5	4	35	1
220	146	39	10.5	F	NW	784	136	13.3	4	4	3	2	2	4	3	3	4	4	4	3	40	1
221	151	35	9.9	F	NW	708	125	14.23	5	4	4	5	4	4	5	4	5	5	5	5	55	3
222	125	24	8.2	F	NW	760	107	15	5	5	4	2	1	4	4	5	5	5	5	5	50	3
223	141	27	9.6	F	UW	725	155	12.6	5	4	4	4	3	4	3	5	4	5	4	4	49	3
224	127	30	6.9	F	OW	618	90	16.85	4	2	3	4	4	4	2	3	3	2	2	3	36	1
225	125	29	7.4	F	OW	576	104	14.37	5	5	4	4	4	4	3	4	5	5	5	5	53	3
226	137	32	9.1	F	NW	668	160	13.93	4	3	1	2	4	5	5	2	5	4	3	2	40	1
227	142	27	8.5	F	UW	660	135	12.27	5	4	4	5	4	5	4	4	4	5	4	4	52	3
228	146	31	9.9	F	UW	510	172	12.03	4	3	4	1	5	4	4	4	5	5	4	4	47	3
229	110	16.9	6.6	F	NW	583	103	18.7	5	5	5	1	1	5	1	5	5	5	5	5	48	3
230	118	23	6.4	F	NW	498	112	16.56	3	5	4	3	1	5	3	3	3	5	4	4	43	2
231	150	64	10.7	F	OB	673	137	13.7	3	2	4	5	5	4	5	5	2	4	5	3	47	3
232	130	29	7.8	F	NW	612	110	13.6	3	1	2	2	2	2	3	3	3	4	3	4	32	1
233	121	19	8.6	F	UW	560	104	16.8	2	2	2	3	2	2	3	2	3	2	2	3	28	1
234	155	48	11.2	F	NW	724	137	12.51	5	5	4	5	5	5	5	5	4	5	5	5	58	3
235	153	24.3	8.6	F	UW	620	130	16.97	1	2	1	2	5	5	4	3	5	3	3	1	35	1
236	140	35.7	10.3	F	NW	542	149	14.9	5	4	4	4	1	5	4	4	1	4	5	4	45	3
237	122	25.6	7	F	NW	520	102	18.63	3	3	2	2	2	3	3	3	4	4	5	5	39	1
238	131	31	7.8	F	NW	611	124	15.2	5	4	3	4	3	5	5	4	5	4	3	4	49	3
239	129	28	8	F	NW	655	94	13.8	4	3	2	1	3	3	3	3	4	4	4	3	37	1
240	142	35	9.9	F	NW	688	123	13.1	4	3	3	2	2	4	4	5	2	5	4	5	43	2
241	117.5	23	6.3	F	NW	570	85	18.69	4	4	4	1	1	3	3	1	5	5	5	5	41	2
242	126	26	8.4	F	NW	614	129	13.06	2	1	2	2	3	2	2	2	2	2	3	2	25	1
243	120	22	6.6	F	NW	640	124	12.5	5	5	5	2	1	1	1	5	5	5	5	5	45	3
244	126	24	7.6	F	NW	604	133	13.7	5	4	4	5	5	4	4	5	4	5	4	4	53	3
245	133	37	10.4	F	OW	720	114	12.4	5	5	5	5	4	4	5	5	5	4	5	5	57	3
246	137	32	10.9	F	NW	660	171	10.8	4	5	3	1	3	5	3	3	2	4	5	4	42	2
247	125	23.1	9.3	F	NW	620	149	14.89	5	4	3	4	4	4	4	2	3	3	5	5	46	3
248	124.5	23	8	F	NW	621	110	16.47	4	4	4	3	2	4	4	5	3	4	3	3	43	2
249	139	43.9	9.3	F	OW	592	108	14.89	4	3	4	3	5	4	5	3	4	5	4	3	47	3
250	149	43	10.6	F	NW	710	155	12.84	4	4	3	3	2	4	5	3	3	4	4	5	44	2
251	149	55.3	9.4	F	OB	656	135	12.36	4	3	4	4	5	5	5	4	4	4	4	5	51	3
252	133	29.1	10.1	F	NW	706	130	13.77	5	5	4	1	1	5	1	4	4	5	5	5	45	3
253	145	30	8.8	F	UW	616	140	11.9	4	2	2	3	5	5	3	2	5	4	5	4	44	2
254	144	41	10.4	F	NW	503	81	15.23	4	3	3	4	4	3	2	4	5	4	4	3	43	2
255	136	30	8.8	F	NW	682	109	17.8	3	5	4	5	5	5	3	4	5	5	5	5	54	3
256	147	45	8.3	F	OW	666	129	14.09	4	3	3	3	2	3	4	3	4	4	3	3	39	1
257	146	39	10.2	F	NW	690	123	13.33	4	5	4	2	3	5	3	3	5	4	4	4	46	3
258	133	26.4	9.8	F	NW	627	88	14.06	5	3	4	5	3	5	5	5	4	5	3	5	52	3
259	130	28	8.1	F	NW	613	128	13.39	5	4	5	5	4	5	4	5	4	5	5	5	56	3
260	147	38	11	F	NW	775	138	12.6	5	5	5	5	5	5	5	5	5	5	5	5	60	3
261	150	40	10.8	F	NW	624	124	13.5	2	4	5	4	2	3	3	3	3	4	2	5	40	1
262	137	40	9.3	F	OW	570	108	15.4	4	4	4	4	4	4	4	4	4	5	4	5	50	3
263	137	34	10.5	F	NW	685	136	14.05	5	5	4	4	5	5	5	4	4	5	4	3	53	3
264	137	29	9.2	F	NW	674	138	14.93	5	3	4	4	4	5	4	4	5	4	4	5	51	3
265	125	24.2	7	F	NW	620	127	14.04	5	3	2	1	3	1	2	5	2	5	1	5	35	1
266	138	32	10.4	F	NW	598	134	13.5	5	4	4	4	4	5	5	5	4	4	4	4	52	3
267	121	29	7	F	OW	388	53	23.4	5	5	5	1	1	1	1	1	5	3	5	3	36	1
268	137	31.4	8.2	F	NW	661	84	15.41	4	4	3	4	3	5	3	4	4	4	5	4	47	3
269	141	29.5	9.3	F	NW	612	102	15.63	5	1	5	3	1	2	2	1	5	3	5	5	38	1
270	122	24	7	F	NW	580	98	13.4	5	4	3	5	5	5	4	4	4	5	4	4	52	3
271	133	35.2	9.8	F	OW	553.1	112	15.49	4	4	3	1	1	3	3	4	3	4	3	3	36	1
272	130	23	9	F	UW	617	112	13.7	5	4	4	3	4	5	4	3	5	4	4	4	49	3
273	139	28.8	10.9	F	UW	622	112	14.31	5	5	5	4	5	4	5	4	3	5	4	5	54	3
274	114	18	6.5	F	NW	411	93	17.04	2	2	2	1	1	2	2	2	3	3	3	3	26	1
275	139	41	9.4	F	OW	664	126	12.8	5	2	3	3	5	4	3	4	4	3	4	3	43	2
276	132	30	8.3	F	NW	646	126	14.9	5	5	4	5	5	5	5	5	5	5	5	5	59	3
277	134	31	9	F	NW	790	128	14.36	5	3	4	4	3	5	5	2	5	4	4	3	47	3
278	128	26.3	10	F	NW	584	115	16.17	4	4	3	4	4	3	4	4	3	4	4	4	45	3
279	140	41	8.8	F	OW	663	95	16.03	4	3	2	3	5	4	5	3	2	5	3	3	42	2
280	124	22	8.5	F	NW	560	147	12.98	5	5	4	4	5	4	3	4	4	5	5	4	52	3
281	122	20.9	7.5	F	NW	444	138	15.15	5	5	4	1	1	5	5	3	4	5	5	4	47	3
282	133	32.2	9.3	F	NW	489	114	15.24	5	3	2	4	4	5	5	4	5	4	5	5	51	3
283	146	61	8.8	F	OB	511	94	16.06	3	3	2	2	2	4	3	4	2	3	4	5	37	1
284	124	30	7.2	F	OW	540	97	13.4	4	4	3	2	2	4	4	4	3	4	4	4	42	2
285	123	20	7.6	F	UW	700	103	13.5	5	5	5	4	5	5	5	5	5	5	5	5	59	3
286	147	42.4	9	F	OW	630	124	14.36	4	3	3	4	4	3	3	3	4	5	3	3	42	2
287	140	43	9.7	F	OW	658	120	15.48	5	5	3	4	1	5	3	5	1	5	4	3	44	2
288	155	45.2	10.9	F	NW	727.4	165	13.27	4	4	4	4	5	4	4	5	4	4	4	4	50	3
289	144	37.4	10.3	F	NW	718	129	14.01	3	4	3	3	2	5	4	4	4	3	3	4	42	2
290	117	21	7	F	NW	405	101	16.35	5	5	5	1	1	1	1	3	5	5	5	3	40	1
291	127	35	8.1	F	OB	633	97	13.9	4	5	3	4	5	4	3	5	4	3	5	5	50	3
292	135	39	10.1	F	OW	574	110	16.41	4	3	5	5	4	4	5	5	4	4	5	5	53	3
293	140	34	10.8	F	NW	710	140	13.3	3	3	4	2	3	3	3	3	4	4	3	3	38	1
294	132	27.8	9.3	F	NW	753	130	12.67	3	3	2	3	5	3	3	2	5	4	3	2	38	1
295	144	38	11	F	NW	600	116	12	4	3	4	2	5	5	5	4	4	3	5	5	49	3
296	126	24	8.4	F	NW	532	73	16.36	5	5	5	1	1	1	1	5	3	5	5	3	40	1
297	121	35.7	8.6	F	OB	572	110	14.93	3	4	5	4	3	4	5	5	4	5	4	2	48	3
298	118	19	6.5	F	UW	603	102	15.09	5	4	4	1	1	4	3	3	3	4	4	5	41	2
299	138	42.6	10.4	F	OW	660	110	15.34	5	3	3	4	5	4	4	5	4	4	5	5	51	3
300	143	53	9.6	F	OB	670	104	14.22	4	4	3	1	2	4	3	1	1	5	3	2	33	1
301	118	22	7	F	NW	590	105	13.9	5	3	4	1	1	4	3	4	1	5	4	5	40	1
302	124.5	22	8.2	F	NW	625	145	12.83	4	4	3	1	3	4	5	5	4	5	5	4	47	3
303	133	33	7.6	F	OW	616	86	15.53	5	5	5	5	5	5	5	5	5	5	5	5	60	3
304	123	35	8.3	F	OB	510	113	15.75	4	3	3	3	4	4	4	4	3	4	4	3	43	2
305	134	30.5	9.4	F	NW	484	160	13.54	5	4	4	1	5	5	5	5	4	5	5	4	52	3
306	148	42	10.7	F	NW	657	165	12.48	4	3	3	4	4	5	3	4	4	5	4	4	47	3
307	135	32	11.1	F	NW	680	143	13.32	3	3	4	2	2	5	5	5	5	4	5	4	47	3
308	124	24	8.3	F	NW	621	110	14	5	3	3	4	5	4	2	3	5	3	3	5	45	3
309	137	32	8.6	F	NW	612	121	15.71	3	3	3	1	1	1	1	3	3	5	5	3	32	1
310	127	22	7.7	F	UW	604	135	16.31	5	5	2	1	2	5	5	5	5	5	5	5	50	3
311	145	47	10.6	F	OW	640	140	12.5	4	4	3	5	5	5	5	4	5	5	5	5	55	3
312	149	33	11.3	F	UW	662	112	13.31	4	4	4	3	2	4	4	3	4	3	4	4	43	2
313	147	60	9.8	F	OB	540	78	17.68	4	3	4	5	3	4	4	4	4	5	5	5	50	3
314	128	26.4	8.2	F	NW	644	92	14.51	5	3	4	1	1	4	4	5	5	5	5	5	47	3
315	118	20	7.2	F	NW	528	52	18.13	5	2	1	1	1	3	3	4	2	4	3	3	32	1
316	144	42	10	F	OW	590	94	15.77	5	4	4	4	5	5	5	5	4	5	5	5	56	3
317	132	40	7.2	F	OB	570	91	13.7	5	4	3	3	4	4	4	3	4	4	4	4	46	3
318	142.5	41.9	10.6	F	OW	661	105	14.02	5	4	4	3	5	5	5	4	4	5	5	5	54	3
319	144	56.6	9.8	F	OB	490	131	16.07	4	3	4	1	3	3	2	3	4	4	3	5	39	1
320	134.9	25	7.8	F	UW	554	111	14.77	4	3	4	5	3	4	4	4	4	5	4	5	49	3
321	135	28	8.8	F	NW	602	121	13.9	5	4	5	4	4	5	5	3	5	3	4	3	50	3
322	145	42	10.7	F	NW	646	130	12.84	3	5	4	1	4	2	4	5	3	5	4	4	44	2
323	130	31	8.5	F	NW	704	130	14.48	5	4	5	3	4	4	4	4	5	5	4	4	51	3
324	138	45.6	9.8	F	OW	620	93	14.59	5	4	4	4	5	5	4	4	4	4	4	4	51	3
325	143	32	10.4	F	NW	703	170	14.21	2	2	3	3	4	2	2	3	5	4	3	3	36	1
326	142	38.7	9.4	F	NW	608	140	13.85	4	2	3	1	2	5	4	3	2	2	4	4	36	1
327	135	31.5	10.4	F	NW	600	122	15.2	5	4	3	4	5	5	5	3	5	3	4	3	49	3
328	139	25	8.7	F	UW	674	108	14.31	4	5	4	3	4	4	4	5	4	5	4	5	51	3
329	124	25	7.6	F	NW	622	120	16.43	5	4	4	4	3	4	4	5	4	5	5	5	52	3
330	126	23	7.5	F	NW	553	115	15.97	4	4	3	3	4	5	4	4	5	3	4	4	47	3
331	122	23	6.5	F	NW	475	124	16.06	4	4	4	4	4	3	4	4	4	4	4	4	47	3
332	148	38.2	10.7	F	NW	680	153	13.32	4	3	3	4	4	3	3	4	5	4	3	3	43	2
333	153.5	41	9.7	F	NW	692	106	13.16	5	5	4	3	4	5	5	5	4	5	5	5	55	3
334	128	29	8.3	F	NW	609	123	13.2	3	1	3	5	3	4	3	4	5	4	4	5	44	2
335	124	21	6.8	F	UW	536	92	18.22	2	3	2	1	1	2	1	3	3	5	5	3	31	1
336	125	25.1	6.8	F	NW	507	93	16.52	4	5	3	1	3	4	5	4	4	3	2	3	41	2
337	143.5	52.3	9.5	F	OB	693	117	13.76	5	4	2	3	5	4	4	4	1	4	4	4	44	2
338	129	25	8.8	F	NW	680	143	11.95	5	4	5	3	3	5	4	4	3	5	5	4	50	3
339	126	30	8.2	F	OW	600	113	14.2	5	4	5	5	4	5	4	5	4	5	5	4	55	3
340	142	31	9.6	F	NW	550	97	14.5	4	3	4	3	5	3	3	4	4	5	4	3	45	3
341	135	27	9.4	F	NW	680	140	13.088	3	4	3	2	3	3	3	4	2	2	4	4	37	1
342	137	32	8.9	F	NW	720	135	14.58	5	3	4	3	3	4	5	4	5	4	3	3	46	3
343	127.5	23	6.5	F	NW	588	110	15.75	5	5	5	5	5	5	5	5	5	5	5	5	60	3
344	132	26.5	8.8	F	NW	620	148	13.8	5	3	4	5	1	5	5	5	5	4	5	5	52	3
345	127	26	7.3	F	NW	588	127	13.35	5	5	5	1	5	3	5	5	5	5	5	5	54	3
346	148.5	46	10.1	F	OW	686	122	12.8	4	3	3	2	4	4	4	3	4	4	5	4	44	2
347	136	30	8.8	F	NW	703	117	12.8	4	4	5	4	5	4	4	4	5	5	3	3	50	3
348	133	26	8.3	F	NW	649	122	15.2	4	4	3	3	3	5	4	3	3	5	5	4	46	3
349	127	28	8	F	NW	457	112	17.58	5	3	3	1	1	1	1	5	3	5	3	5	36	1
350	150	36	11.2	F	NW	668	153	12.48	4	1	3	2	3	5	4	3	3	4	5	4	41	2
351	139	34	8.9	F	NW	617	119	14.25	5	4	4	5	4	5	4	5	4	5	5	5	55	3
352	126	22	6.8	F	UW	625	120	15.4	5	5	4	5	3	4	5	3	5	5	5	4	53	3
353	130	34	9.2	F	OW	512	129	13.6	4	4	3	3	4	4	4	4	4	5	4	4	47	3
354	117	18	6.4	F	UW	620	116	15.53	4	4	3	4	3	3	5	4	4	5	5	4	48	3
355	135	32	10.7	F	NW	625	135	14.3	4	3	2	3	5	4	4	4	3	2	3	3	40	1
356	131.5	34	7.3	F	OW	568	133	14.92	3	2	2	5	3	4	4	3	5	5	4	4	44	2
357	144	34	9.9	F	NW	741	131	11.82	4	3	3	3	4	4	4	3	4	3	4	4	43	2
358	150	51	9.9	F	OW	745	120	12.8	5	4	4	5	4	5	4	5	4	5	4	4	53	3
359	124	27.4	7.2	F	OW	575	76	17.77	4	5	4	5	5	5	4	4	5	5	1	5	52	3
360	147	40.5	10.8	F	NW	716	122	14.1	4	3	3	4	2	5	5	4	2	5	4	4	45	3
361	128	33	9	F	OW	512	77	16.35	3	3	1	1	1	1	1	3	5	5	3	4	31	1
362	146	43	10.8	F	NW	780	157	11.2	4	3	5	5	4	5	4	3	5	3	5	4	50	3
363	127	26	7.5	F	NW	586	115	16.44	4	1	3	2	5	4	4	5	3	5	4	3	43	2
364	141	30.5	9.9	F	NW	800	145	12.5	5	4	4	5	4	5	5	5	5	5	5	5	57	3
365	134	29	8.6	F	NW	748	134	13.76	5	5	3	5	4	3	3	4	3	5	4	5	49	3
366	116	21	6.6	F	NW	608	140	14.92	5	4	4	3	3	4	4	5	3	5	5	5	50	3
367	133	27	10	F	NW	563	132	12.66	4	3	3	4	5	5	5	4	5	4	3	3	48	3
368	140	37	8.9	F	NW	720	114	14.3	5	3	5	1	2	5	4	5	1	4	4	3	42	2
369	119	24	6.6	F	NW	540	72	17.7	5	4	3	3	3	4	3	4	4	4	4	4	45	3
370	141	45	10.3	F	OW	663	105	14.58	2	2	2	5	4	3	2	3	3	2	3	3	34	1
371	123	33	7.4	F	OB	515	100	13.77	4	5	4	5	5	5	5	5	5	5	4	5	57	3
372	112	20	7.1	F	NW	638	91	16.1	5	5	5	2	5	5	5	5	5	5	5	5	57	3
373	137	33	8.9	F	NW	616	125	12.64	4	4	4	5	4	4	4	3	3	4	4	4	47	3
374	133	34	7.9	F	OW	592	99	16.03	5	4	5	4	5	5	5	4	5	5	3	5	55	3
375	126.5	24.7	9.6	F	NW	693	106	14.69	5	4	5	4	5	5	5	4	5	4	5	5	56	3
376	122	31	6.8	F	OB	487	76	16.92	3	5	5	1	1	1	1	5	1	5	5	3	36	1
377	129	29	8.8	F	NW	636	110	14.94	5	4	4	5	3	4	3	4	5	4	5	5	51	3
378	142	36	10.1	F	NW	698	145	16.84	1	3	2	4	4	1	1	2	1	1	2	3	25	1
379	132	26	7.6	F	NW	635	120	15.66	4	3	4	5	3	5	4	3	3	5	5	4	48	3
380	126	26.9	10	F	NW	620	109	14.11	3	5	3	2	1	4	5	3	5	4	3	4	42	2
381	146	32	10.5	F	NW	690	140	13.17	4	3	3	3	4	4	3	3	2	2	5	3	39	1
382	163	45.6	10.1	F	NW	815	181	11.99	4	3	3	4	4	4	3	4	5	4	4	4	46	3
383	142	33	9.8	F	NW	630	167	12.6	5	3	2	5	3	5	4	3	5	5	3	3	46	3
384	142	40	9.7	F	OW	712	145	13.7	5	4	4	5	5	5	4	4	5	5	5	5	56	3
385	134	30	9	F	NW	580	123	11.8	5	5	5	3	5	5	4	5	5	4	5	5	56	3
386	150.5	37	11.1	F	NW	674	128	13.09	4	3	3	2	5	5	4	4	3	4	3	4	44	2
387	131	28	9.3	F	NW	660	152	12.62	5	5	5	4	5	4	5	4	5	5	4	4	55	3
388	148	37.7	10.8	F	NW	582	171	14.01	5	4	4	3	3	4	4	5	5	5	5	5	52	3
389	129	20.6	8.8	F	UW	576	118	14.36	5	3	3	1	4	5	4	4	5	5	5	4	48	3
390	139	33	9.8	F	NW	836	159	12.1	5	3	3	4	5	4	4	4	4	4	4	4	48	3
391	123	24.2	6.5	F	NW	450	75	21.58	5	5	1	1	1	4	1	1	1	5	3	3	31	1
392	150	40	10.7	F	NW	556	156	12.96	5	5	5	4	4	5	5	5	4	5	5	4	56	3
393	125	24	7.4	F	NW	510	105	14.1	5	5	5	2	5	5	3	4	5	5	4	5	53	3
394	133	26	9.5	F	NW	523	144	12.67	2	4	5	1	1	2	2	4	5	4	5	4	39	1
395	125	25	8.1	F	NW	514	140	18.16	4	5	4	4	1	4	5	3	5	5	5	4	49	3
396	123	25	6.6	F	NW	380	90	17.11	5	5	5	1	1	1	1	5	5	5	5	5	44	2
397	136	27	9.1	F	NW	520	103	14.34	5	4	3	3	5	5	4	3	5	5	4	4	50	3
398	125	23.9	7.3	F	NW	504	121	18.47	5	4	5	1	1	5	1	2	5	5	5	5	44	2
399	135	29	10.6	F	NW	695	149	12.02	5	4	3	4	4	5	5	4	4	4	4	4	50	3
400	139	33	10.2	F	NW	740	165	11.2	4	4	4	4	5	4	5	5	4	5	5	5	54	3
401	140	42	9.3	F	OW	642	148	13.46	5	4	5	4	4	5	5	5	5	5	5	5	57	3
402	137	32	9.4	F	NW	676	120	15.14	4	3	4	3	3	4	3	4	4	3	3	4	42	2
403	129	33	7.5	F	OW	720	119	14.4	4	4	3	4	2	2	2	5	5	5	5	5	46	3
404	136	35	9	F	NW	730	141	11.5	3	1	4	5	5	5	5	4	5	5	4	5	51	3
405	127	27	8.3	F	NW	642	140	13.95	3	3	2	1	1	2	2	2	3	3	5	4	31	1
406	127	27.1	6.3	F	NW	512	105	19.3	5	5	5	5	4	5	5	5	5	5	3	5	57	3
407	138	31	9.2	F	NW	703	143	14.07	5	4	4	4	4	5	5	5	5	5	5	5	56	3
408	138	27	9.9	F	UW	783	129	13.2	4	3	3	4	4	4	4	4	5	4	3	4	46	3
409	129	29	8	F	NW	629	98	14.7	5	4	2	5	3	5	5	3	2	4	3	5	46	3
410	125	27.3	7.7	F	NW	636	104	16.69	5	5	4	1	1	5	5	4	4	5	5	5	49	3
411	154	43.8	11.3	F	NW	652	160	13.35	4	2	2	1	5	1	3	2	1	4	3	4	32	1
412	130	23.1	7.5	F	UW	680	137	15.76	4	4	5	1	1	4	4	3	4	5	5	5	45	3
413	131	30	7.6	F	NW	526	80	18.06	5	4	3	1	1	5	1	5	5	5	4	4	43	2
414	137	26.3	8.7	F	UW	680	124	13.11	3	2	4	4	2	4	3	3	2	4	4	4	39	1
415	133	25	8.1	F	NW	524	144	12.9	5	5	5	5	5	5	5	5	5	5	5	5	60	3
416	139	29	8.9	F	NW	527	121	14.27	4	2	2	1	3	4	3	2	1	3	4	2	31	1
417	116	23	6.9	F	NW	620	87	16.2	5	4	5	4	3	4	3	5	5	4	5	4	51	3
418	137	32	9	F	NW	625	110	14.9	4	4	5	5	5	4	4	4	4	5	5	5	54	3
419	154	56	9.7	F	OB	598	97	13.9	4	4	4	5	4	3	5	4	5	4	4	4	50	3
420	136	31.6	10.5	F	NW	560	152	12.75	4	3	4	3	1	3	4	3	2	3	4	4	38	1
421	139	37	9.7	F	NW	785	128	12.59	4	4	4	4	5	5	5	5	5	5	5	5	56	3
422	131	35.2	9.4	F	OW	606	138	16.13	4	3	4	1	2	5	5	4	4	5	5	4	46	3
423	136	44.7	8.8	F	OB	672	136	14.43	4	4	3	1	1	2	2	4	5	3	3	5	37	1
424	122	23.4	7	F	NW	577.3	105	14.64	5	4	3	1	5	5	5	4	4	5	4	5	50	3
425	144	38	10.8	F	NW	561	125	13.56	5	4	4	4	5	5	5	4	5	5	3	4	53	3
426	129	26	9.3	F	NW	689	122	11.91	5	4	4	5	4	5	5	4	3	4	4	4	51	3
427	120	22	6.8	F	NW	500	119	14.43	5	4	5	1	1	1	1	1	5	5	5	3	37	1
428	151	38	10.6	F	NW	676	131	12.87	4	4	3	4	5	5	5	5	3	5	5	5	53	3
429	148	50.9	10	F	OW	717	112	15	3	4	2	5	5	3	5	4	3	3	5	3	45	3
430	154	41	11.3	F	NW	740	145	12.8	5	4	5	1	3	5	5	3	5	5	4	4	49	3
431	126	25	7.6	F	NW	610	119	15.7	5	4	4	2	3	4	4	4	5	5	4	4	48	3
432	132	27.9	8.6	F	NW	571	142	13.74	5	5	5	5	4	5	4	5	5	5	5	5	58	3
433	123	21.5	7.3	F	NW	510	80	18.99	4	3	3	4	4	3	4	5	5	4	4	4	47	3
434	135	25	9.9	F	UW	681	140	11.57	5	3	2	1	3	3	3	3	4	3	4	3	37	1
435	148	42	11.3	F	NW	850	140	11.2	5	4	4	5	5	5	5	5	4	4	5	5	56	3
436	141	37	8.8	F	NW	624	127	13.6	4	2	2	3	4	5	5	4	5	4	4	4	46	3
437	124.5	28	7.5	F	OW	752	105	18.47	4	5	4	4	5	4	5	4	5	5	5	4	54	3
438	139	45	10.7	F	OW	730	144	11.5	4	4	5	4	5	5	5	4	4	5	4	4	53	3
439	145	39	9.9	F	NW	691	171	12.9	4	2	4	3	3	5	5	5	5	4	5	4	49	3
440	133	28	7.5	F	NW	606	105	16.19	4	3	2	4	1	4	5	5	5	4	5	5	47	3
441	131	29	9.5	F	NW	667	116	14.08	5	4	5	5	4	5	5	4	5	4	4	4	54	3
442	130	30.5	9.1	F	NW	686	104	14.54	4	4	4	4	5	4	4	4	5	5	5	4	52	3
443	119	23.4	8.1	F	NW	659	120	14.34	4	5	4	4	3	5	3	4	5	5	5	4	51	3
444	133	28.5	8.4	F	NW	636	122	16.03	5	3	2	4	4	5	3	4	2	5	4	5	46	3
445	132	34.4	8.4	F	OW	640	89	16.61	5	2	3	5	1	4	5	4	5	3	3	3	43	2
446	136	35	8.6	F	OW	676	109	13.62	2	3	3	4	2	4	3	2	2	4	5	5	39	1
447	128	29	9.4	F	NW	589	99	14.47	4	5	3	2	1	3	3	4	5	4	4	3	41	2
448	130	24	7.8	F	NW	610	128	14.6	5	4	3	3	4	4	4	5	5	4	4	4	49	3
449	137	31	10.9	F	NW	526	128	12.3	4	3	5	3	4	3	3	4	4	4	3	4	44	2
450	116	20	6.4	F	NW	546	107	14.2	5	5	5	3	3	5	5	5	5	5	5	4	55	3
451	133	32.9	7.7	F	OW	580	100	16.34	5	3	2	4	3	4	3	3	3	1	4	3	38	1
452	121	27	6.4	F	OW	481	97	16.26	5	5	5	1	1	1	1	5	5	5	5	5	44	2
453	119	22	7.3	F	NW	466	97	14.49	3	3	3	1	1	3	3	3	4	4	4	3	35	1
454	125	27	7.7	F	NW	648	114	13.1	5	4	3	3	2	4	4	4	4	5	5	4	47	3
455	124	24.8	8.3	F	NW	698	124	13.48	5	5	4	5	5	5	5	5	5	4	5	5	58	3
456	142.5	33	9.4	F	NW	668	140	12.84	4	4	4	3	4	4	4	4	4	4	4	4	47	3
457	148	40.4	10.3	F	NW	689	130	13.82	4	4	4	3	4	4	4	5	4	4	4	4	48	3
458	145	33	10.3	F	NW	850	157	11.1	5	4	4	5	5	5	5	5	5	4	5	5	57	3
459	132	36	9.3	F	OW	590	108	15.5	5	4	4	3	3	3	4	2	4	3	5	3	43	2
460	124	26.1	6.4	F	NW	528	112	17.01	5	5	5	5	5	5	5	5	5	5	1	5	56	3
461	126	21.8	8.3	F	UW	624	128	15.46	5	4	5	1	4	5	5	5	4	5	5	5	53	3
462	140	29	10.8	F	UW	650	117	13	4	4	5	4	5	4	4	4	5	5	4	4	52	3
463	121	24	6.6	F	NW	480	78	15.8	5	4	4	5	4	5	4	4	5	4	5	5	54	3
464	150	41	10.8	F	NW	546	150	13	4	3	2	2	1	2	2	3	3	3	4	4	33	1
465	124	30.7	6.8	F	OW	590	80	15.59	4	5	4	4	4	4	4	5	5	5	5	5	54	3
466	127	29.9	6.6	F	OW	594	107	15.51	5	5	4	1	1	3	2	4	4	5	4	5	43	2
467	135	33	9.9	F	NW	594	102	12.97	2	1	1	3	1	1	2	2	5	3	2	1	24	1
468	137	28.9	11	F	NW	664	156	13.59	5	5	4	3	4	5	4	5	4	4	5	4	52	3
469	144.5	37	10.2	F	NW	698	125	13.52	4	2	2	3	4	3	4	2	3	3	3	2	35	1
470	126	26	7	F	NW	660	133	13	4	4	3	3	1	5	3	4	5	5	4	5	46	3
471	119	22	8.3	F	NW	573	122	14.56	4	3	4	3	3	4	2	4	3	5	3	3	41	2
472	127	34	7.9	F	OW	524	80	16.78	3	2	2	1	1	3	2	3	2	3	3	3	28	1
473	125	27.6	8.4	F	NW	540	81	18.1	5	4	3	1	1	4	5	3	5	5	5	5	46	3
474	138.5	32	9.6	F	NW	594	55	15.64	3	2	4	1	1	3	2	1	5	2	2	2	28	1
475	137.5	31.8	9.8	F	NW	761	115	13.07	5	4	4	1	5	5	2	4	5	4	4	5	48	3
476	170	74	11.3	F	OW	534	130	14	5	5	5	5	5	5	5	5	5	5	5	5	60	3
477	126	32	8.5	F	OW	645	100	12.5	4	3	3	4	3	4	5	4	3	4	4	3	44	2
478	144	36.2	9.4	F	NW	697	100	13.32	4	5	3	2	3	5	1	2	5	4	5	3	42	2
479	129	33	7.4	F	OW	460	106	17.38	5	5	5	1	1	1	1	4	4	5	4	4	40	1
480	143	39	10.8	F	NW	650	130	12.93	5	5	5	4	5	5	5	4	5	5	5	5	58	3
481	136	35	8.8	F	NW	668	150	12.04	4	5	4	4	5	4	4	4	5	5	5	5	54	3
482	128	27	8.9	F	NW	688	105	13.9	5	3	4	5	4	5	5	5	3	5	4	5	53	3
483	127.5	26	7.6	F	NW	546	90	14.57	3	2	2	1	1	3	2	3	2	3	3	3	28	1
484	145	45	8.3	F	OW	655	111	14.05	3	3	5	3	3	4	4	4	4	5	4	4	46	3
485	129	28.3	6.6	F	NW	488	76	17.34	5	1	5	5	4	5	4	4	1	5	1	3	43	2
486	155	39.8	10.9	F	NW	810	156	12.6	4	4	4	5	5	5	5	4	4	4	4	4	52	3
487	140	41.7	9.9	F	OW	560	126	13.29	5	4	3	2	2	3	3	3	4	4	3	3	39	1
488	131	30	8.8	F	NW	571	114	14.05	5	5	5	5	5	5	5	5	5	5	5	5	60	3
489	139	33	10.8	F	NW	674	135	12.51	4	4	3	3	5	5	4	4	1	4	4	4	45	3
490	127	27	9.2	F	NW	640	140	12.2	4	5	4	4	5	5	5	4	5	5	5	5	56	3
491	117	20	7.8	F	NW	480	107	15.16	1	1	1	1	1	1	1	5	5	5	5	5	32	1
492	157	45	11.3	F	NW	766	142	14.1	4	4	3	4	3	3	3	4	4	2	4	4	42	2
493	136	32	8.9	F	NW	749	165	14.8	4	3	4	3	5	4	5	4	5	3	4	4	48	3
494	130	28	8.4	F	NW	556	95	14.76	4	3	4	3	2	4	3	4	5	5	5	5	47	3
495	125	20	7.9	F	UW	596	111	16.28	5	1	5	2	2	5	5	5	5	5	5	5	50	3
496	124	21	8.3	F	UW	640	123	14.2	4	3	2	2	5	4	4	4	4	3	4	4	43	2
497	143	40	10.4	F	NW	720	135	14	5	5	5	5	5	5	5	5	5	5	5	5	60	3
498	126	25	9	F	NW	720	157	12.3	5	5	5	4	4	5	5	5	5	5	5	4	57	3
499	145	46	10.5	F	OW	527	110	15	5	5	4	5	5	4	4	5	5	5	5	5	57	3
500	123	25	7.7	F	NW	608	110	13.8	5	3	3	2	2	3	4	2	2	2	1	2	31	1
501	146	49.5	10.3	F	OW	646	138	14.51	3	1	4	1	5	3	4	5	3	5	1	3	38	1
502	131	30	7.9	F	NW	540	120	14.81	5	4	4	4	3	4	3	5	5	5	4	5	51	3
503	145	33	10.7	F	NW	616	168	13.25	5	4	3	4	4	5	5	4	3	4	4	4	49	3
504	142	37	11	F	NW	726	140	12.51	5	4	4	5	4	4	4	5	4	5	4	4	52	3
505	137	29	9.6	F	NW	685	146	12.4	5	4	4	3	4	5	4	4	5	4	4	5	51	3
506	138	30	9.1	F	NW	610	130	14.2	4	4	3	3	3	4	5	4	3	4	4	4	45	3
507	161	53	11	F	NW	690	154	12	4	4	4	2	3	5	5	5	3	3	5	4	47	3
508	122	16	7.3	F	UW	600	114	14.9	4	3	2	4	2	5	4	4	2	3	3	3	39	1
509	133	30	8.8	F	NW	590	113	14.45	5	4	1	2	5	5	5	3	4	5	5	5	49	3
510	119	21	7.1	F	NW	462	115	17.65	5	4	4	5	5	5	5	5	4	5	4	4	55	3
511	135	29	9.3	F	NW	683	116	13.15	5	3	4	3	2	3	3	4	3	5	4	3	42	2
512	127	21	7.8	F	UW	612	118	16.2	5	5	5	4	5	5	5	5	5	5	4	5	58	3
513	123	24	7.3	F	NW	628	110	14.37	3	5	4	1	5	4	3	5	5	3	5	5	48	3
514	127	27	8.2	F	NW	588	123	13.12	4	4	5	4	4	5	4	4	5	4	4	5	52	3
515	142	34.3	9.1	F	NW	570	97	16.56	4	4	4	5	5	5	5	4	5	4	3	4	52	3
516	120	23	6.8	F	NW	646	92	14.81	5	4	4	3	2	4	3	4	5	5	5	5	49	3
517	145.5	35	9.7	F	NW	738	125	13.59	4	3	3	2	4	3	2	3	3	4	3	5	39	1
518	140	43	9.6	F	OW	645.7	75	15.79	4	5	2	3	5	5	4	2	5	1	5	5	46	3
519	109	20	6.3	F	NW	460	101	16.8	4	5	4	3	1	5	5	4	5	5	4	5	50	3
520	118	20	7.4	F	NW	630	130	14.56	3	5	4	1	5	3	2	5	5	5	5	5	48	3
521	131	28	8.8	F	NW	672	76	15.58	5	5	4	4	5	4	5	5	5	5	5	5	57	3
522	128	25.1	7	F	NW	492	41	31.5	4	4	3	1	1	4	3	3	1	5	5	5	39	1
523	123	23	7.3	F	NW	772	137	12.3	4	4	4	4	5	4	4	5	5	5	5	5	54	3
524	127	26	8.7	F	NW	674	120	14.14	4	3	4	4	4	3	5	5	5	5	5	5	52	3
525	145	37	10.1	F	NW	720	139	13.3	4	3	4	2	5	5	4	5	5	5	4	5	51	3
526	131	22	8.5	F	UW	636	130	15.06	5	3	4	1	4	5	3	4	5	5	2	3	44	2
527	132	28	11	F	NW	660	141	12.86	5	5	5	5	5	5	5	5	5	4	4	4	57	3
528	118	20	8.1	F	NW	581	109	15.13	3	2	2	4	4	4	4	3	3	4	3	5	41	2
529	139.5	41	9.8	F	OW	600	108	14.9	3	3	4	3	2	2	3	2	3	3	3	3	34	1
530	126	23	6.8	F	NW	560	95	13.3	5	4	3	1	1	5	1	5	4	4	5	5	43	2
531	145	54	11.1	F	OB	598	109	14.2	4	3	3	3	5	5	4	4	3	3	4	4	45	3
532	125	23.1	7	F	NW	560	94	15.3	2	3	5	1	5	3	1	4	1	3	3	2	33	1
533	131	31	9.7	F	NW	697	140	12.26	5	4	4	3	4	5	5	4	4	5	5	5	53	3
534	134	27	9.8	F	NW	704	136	12.34	5	4	4	4	5	4	3	5	5	5	4	4	52	3
535	141	30	10.6	F	NW	614	148	13.3	4	2	3	5	5	5	4	5	5	5	4	5	52	3
536	125	24	7.4	F	NW	780	108	13.6	4	4	1	2	3	2	1	5	4	5	5	5	41	2
537	124	22.4	6.6	F	NW	615	106	15.52	5	5	5	4	1	5	5	4	5	5	5	5	54	3
538	125	28	6.9	F	OW	583	114	13.8	5	5	5	5	5	5	5	5	5	5	5	5	60	3
539	143	31.1	11.1	F	NW	754.1	158	11.81	4	4	4	1	5	5	5	5	5	4	5	5	52	3
540	128	32	8.3	F	OW	632	113	14.23	4	3	5	2	3	5	5	2	4	4	5	5	47	3
541	134	28	10.4	F	NW	654	131	14.52	4	4	4	3	5	5	4	4	5	4	5	4	51	3
542	145	39.7	10.9	F	NW	596	127	13.53	4	4	4	5	5	4	4	5	5	5	5	5	55	3
543	133	28	9.8	F	NW	735	150	11.1	5	4	2	3	3	4	3	4	5	4	4	5	46	3
544	121	20	7.2	F	UW	580	79	14.8	3	3	1	3	4	2	3	4	4	4	2	3	36	1
545	121	24.5	6.5	F	NW	400	83	19.6	4	2	4	1	1	4	4	3	3	5	5	5	41	2
546	123	22	8.3	F	NW	612	103	13.6	4	4	3	3	5	4	4	3	3	4	4	4	45	3
547	140	32	9.8	F	NW	628	133	13.15	5	4	4	3	5	5	4	4	5	5	4	4	52	3
548	136	28.7	9.7	F	NW	703	144	13.58	5	5	5	5	5	5	5	5	5	5	5	5	60	3
549	155	46	11.1	F	NW	583	164	11.4	5	4	4	3	5	5	4	4	2	5	4	4	49	3
550	140	28.3	9.3	F	NW	715	97	15.24	5	3	3	5	5	5	4	5	3	3	4	5	50	3
551	136	35	10.4	F	NW	642	115	14.62	2	2	3	3	4	4	3	4	5	3	4	4	41	2
552	137	37.3	9.3	F	OW	727.9	113	13.4	4	5	3	5	5	4	3	4	4	4	4	4	49	3
553	134	33	10	F	NW	630	123	13.4	3	2	3	4	3	3	2	2	5	3	4	3	37	1
554	131	25	9.3	F	NW	625	130	13.3	5	4	5	4	2	4	5	5	5	4	4	3	50	3
555	126	34.5	9.7	F	OW	800	115	12.3	5	5	5	4	5	5	4	5	4	5	5	5	57	3
556	137.5	38	9.6	F	OW	598	84	18.54	2	3	1	3	1	3	4	5	1	5	4	3	35	1
557	130	31	8.3	F	NW	636	117	13	3	3	4	1	1	4	1	4	4	5	4	4	38	1
558	114	18.2	6.5	F	NW	547	80	16.75	4	3	4	3	1	3	4	3	5	3	2	3	38	1
559	150	41	9.8	F	NW	660	127	11.65	4	5	4	4	3	4	4	5	4	4	5	4	50	3
560	130	24.9	10.6	F	UW	658	136	14.15	5	4	5	3	5	5	3	4	5	4	4	4	51	3
561	130	35	7.3	F	OW	550	80	18	3	2	4	3	1	4	3	2	1	4	2	1	30	1
562	130	32	6.7	F	OW	530	119	14.96	5	5	5	1	1	1	1	5	3	5	5	5	42	2
563	139	40	9.7	F	OW	600	136	13.11	4	5	3	3	5	4	4	4	3	5	4	4	48	3
564	120	24	6.3	F	NW	560	92	14.5	5	1	5	2	5	5	1	3	5	3	3	3	41	2
565	127	25	9	F	NW	662	125	14	5	4	5	4	4	5	5	5	4	5	4	5	55	3
566	127	31	7.8	F	OW	720	106	14.6	5	4	4	3	4	4	3	3	2	3	4	5	44	2
567	131	38.8	9.1	F	OW	620	89	16.96	5	4	4	1	1	5	5	5	4	4	4	5	47	3
568	139	39	9.4	F	OW	582	96	14.9	5	5	5	4	4	5	4	5	4	5	5	4	55	3
569	146	36	10.2	F	NW	694	160	12	5	5	4	5	5	5	4	5	4	4	5	5	56	3
570	148	33	11	F	NW	703	117	13.1	4	3	3	1	4	4	4	5	1	5	3	4	41	2
571	123	22	7.7	F	NW	588	109	14.28	5	4	5	3	3	5	3	5	4	5	5	5	52	3
572	127	22.6	9.3	F	UW	574	133	17.14	3	4	1	1	3	3	3	2	1	5	5	5	36	1
573	144	43.1	9.8	F	OW	679	112	15.52	5	3	4	4	5	5	4	2	4	4	4	3	47	3
574	135	27.5	9.9	F	NW	716	130	13.07	5	3	4	4	5	5	4	3	2	5	5	5	50	3
575	138	40	9.3	F	OW	621.8	107	15.83	2	1	2	1	1	2	1	1	2	3	4	2	22	1
576	136	29	10.5	F	NW	670	140	12.75	5	4	3	3	2	5	5	4	3	4	4	4	46	3
577	144	30	8.9	F	NW	718	150	13.53	3	4	5	3	2	4	5	5	5	4	5	2	47	3
578	146	41	9.4	F	NW	617	135	13.91	4	3	3	4	5	4	4	3	3	4	4	4	45	3
579	128	29	7	F	NW	620	90	15.06	5	3	3	1	1	5	2	2	5	5	4	5	41	2
580	136	29	9.8	F	NW	526	101	15.53	4	3	3	4	2	4	3	3	4	4	2	3	39	1
581	118	21.2	6.6	F	NW	620	81	18.72	3	3	2	4	3	4	3	4	3	4	4	4	41	2
582	120	23	7.4	F	NW	506	90	17.84	5	4	4	5	5	5	5	5	5	5	5	5	58	3
583	142	36	10.2	F	NW	785	142	11.4	5	5	4	3	3	4	4	5	5	5	4	4	51	3
584	123	25.1	6.8	F	NW	580	115	13.46	2	4	5	5	1	3	4	2	5	5	5	5	46	3
585	136	28.1	9.8	F	NW	616	137	14.7	5	5	5	1	1	3	3	4	1	5	5	1	39	1
586	139	32.3	9.2	F	NW	682	130	15.13	5	4	3	5	4	3	4	5	4	5	4	4	50	3
587	136	38	9.3	F	OW	663	127	12.6	3	2	2	3	2	4	4	4	3	4	4	4	39	1
588	138	28.9	9.1	F	NW	526	111	17.18	4	3	2	1	4	3	3	4	5	5	5	3	42	2
589	132	25	7.4	F	NW	606	134	13.32	5	4	5	3	3	5	3	5	4	5	5	5	52	3
590	128	22	8.5	F	UW	561	133	14.46	2	3	2	5	1	4	2	4	4	5	3	3	38	1
591	140	30	11	F	NW	565	125	13.43	4	2	3	1	3	3	3	4	3	3	3	3	35	1
592	138	31	9.6	F	NW	694	136	13.13	5	4	4	4	3	4	5	5	5	5	4	4	52	3
593	133	27	9.6	F	NW	746	145	12.81	4	3	3	3	4	5	4	3	5	4	3	4	45	3
594	145	43	9.5	F	OW	783	156	11.2	5	5	4	3	2	3	3	4	3	5	5	5	47	3
595	136	54	9.9	F	OB	532	80	16.6	3	2	4	5	3	3	4	5	5	3	1	1	39	1
596	147	31	10.8	F	UW	705.8	108	13.61	4	3	3	5	5	4	5	4	3	3	5	5	49	3
597	132	32.6	7.6	F	OW	580	91	19.57	4	3	4	1	2	3	3	2	4	5	5	5	41	2
598	131	27	9.3	F	NW	697	127	13.2	5	4	4	4	2	3	4	5	4	3	1	5	44	2
599	123	25	8.5	F	NW	570	155	13.31	3	3	3	4	4	4	3	4	5	5	5	4	47	3
600	138	29	10.9	F	NW	730	125	12.2	3	2	2	2	4	5	4	3	4	2	4	5	40	1
601	144	33	9.6	F	NW	700	89	13	5	5	4	5	5	5	5	4	5	4	4	3	54	3
602	137	44.3	9.3	F	OB	716	131	13.46	4	4	2	4	4	5	3	3	5	4	4	4	46	3
603	131	25	8.4	F	NW	584	123	14.1	5	4	4	5	5	5	5	5	5	4	5	5	57	3
604	125	36	8.4	F	OB	595	82	18	5	3	4	5	5	4	4	3	5	5	5	3	51	3
605	136	34	9.4	F	NW	682	150	11.4	5	5	4	4	5	5	5	4	5	5	5	4	56	3
606	122	21.9	7.6	F	NW	538	126	16.27	5	5	4	1	1	4	4	5	4	5	5	5	48	3
607	138	34	10.3	F	NW	760	133	11.7	4	3	4	2	5	3	3	4	5	3	4	4	44	2
608	135	35	7.7	F	OW	430	105	15.15	5	2	2	4	2	4	5	5	5	4	3	3	44	2
609	142	41	10.9	F	NW	646	130	15	5	4	3	4	3	4	3	3	4	3	5	4	45	3
610	130.4	23.7	10	F	UW	733	119	14.12	3	3	2	3	5	2	1	3	2	1	3	2	30	1
611	144	31	10.1	F	NW	840	132	11.4	4	4	3	5	3	3	3	5	1	4	4	2	41	2
612	136	30	10.3	F	NW	688	123	13.3	5	4	4	3	4	5	5	5	4	4	4	4	51	3
613	123	23	9.4	F	NW	680	149	12.8	5	4	3	5	5	5	5	4	4	3	4	3	50	3
614	129	36	9.4	F	OW	607	127	15.07	4	3	3	4	5	3	4	4	5	4	5	4	48	3
615	146.5	41	10.1	F	NW	662	170	12.35	5	3	2	1	4	4	4	5	4	5	5	4	46	3
616	124	22	8.3	F	NW	720	127	12	4	4	5	5	3	5	5	4	3	5	4	5	52	3
617	154	41.5	11.1	F	NW	735.9	142	13.13	5	4	4	5	5	3	3	4	4	4	5	4	50	3
618	131	24	9.2	F	UW	568	105	13.8	4	3	4	4	4	4	5	5	4	4	4	4	49	3
619	140	29.2	10	F	NW	660	115	14.68	4	4	3	3	2	3	4	4	2	3	4	4	40	1
620	130	24	8.7	F	NW	566	100	15.59	5	5	5	5	5	5	5	5	5	5	5	5	60	3
621	132	30	9	F	NW	684	148	12.5	5	4	3	1	5	5	4	5	5	5	5	4	51	3
622	127	24	8.8	F	NW	704	136	13.4	4	3	3	4	4	4	4	3	3	2	3	3	40	1
623	137	35	10.2	F	NW	714	125	12.2	5	3	4	4	5	5	5	4	5	5	5	5	55	3
624	130.5	30	9.3	F	NW	803	150	12.6	5	4	5	3	2	5	5	5	4	4	5	5	52	3
625	135	43	9.2	F	OB	622	89	15	5	4	5	5	5	5	5	5	5	5	5	5	59	3
626	131	30	8.2	F	NW	620	156	13.31	5	5	4	5	1	5	4	4	5	5	5	4	52	3
627	120	23	7.2	F	NW	575	102	14.8	4	3	4	3	2	2	2	3	3	4	4	5	39	1
628	126	23.7	6.8	F	NW	513	107	16.63	5	5	5	4	5	2	5	5	5	5	5	5	56	3
629	122	26	8.7	F	NW	546	130	14.05	5	5	5	5	5	5	5	4	5	4	4	4	56	3
630	117	20.3	6.9	F	NW	486	112	14.68	4	4	4	1	1	4	4	4	3	5	3	3	40	1
631	145	34	10.7	F	NW	592	150	15.16	4	3	3	3	4	3	3	4	5	5	4	4	45	3
632	144	48	11.2	F	OW	828	150	12	5	4	2	5	3	4	4	5	5	4	3	4	48	3
633	138	34.9	10.5	F	NW	710	160	13.7	4	3	4	3	5	5	5	4	5	4	4	4	50	3
634	138.5	27.8	10.7	F	UW	786	162	12.4	5	4	4	4	5	4	3	4	5	5	4	4	51	3
635	128	22.3	10.3	F	UW	652	99	13.77	4	3	5	5	1	2	2	3	1	1	1	3	31	1
636	135	29	9.3	F	NW	604	105	14.87	4	3	2	1	3	5	4	3	2	4	4	4	39	1
637	131	31.1	9.9	F	NW	606	105	15.99	5	3	4	5	1	5	5	5	5	5	5	4	52	3
638	149.5	37.9	11.1	F	NW	722.9	143	13.35	4	3	3	2	4	5	4	4	3	4	4	4	44	2
639	127	25	6.9	F	NW	576	83	17.2	5	5	4	1	1	5	5	5	4	5	5	5	50	3
640	142	30.6	11	F	NW	566	156	13.98	5	4	5	3	4	5	4	3	4	5	5	4	51	3
641	133.5	42	8.6	F	OB	526	81	14.6	5	4	5	4	5	5	5	4	5	5	5	5	57	3
642	128	37	8.4	F	OB	547	98	16.46	3	5	3	1	1	1	1	1	3	5	3	5	32	1
643	127	27	7.4	F	NW	635	119	12.8	5	4	4	3	4	4	3	4	4	4	5	4	48	3
644	125	20	6.3	F	UW	535	129	18.2	4	3	3	3	5	5	5	4	5	5	4	4	50	3
645	124	30	8.1	F	OW	545	130	13.91	4	4	3	1	1	4	4	4	3	4	3	4	39	1
646	124	24.3	8.5	F	NW	590	114	12.57	4	2	3	4	5	4	3	4	1	5	4	4	43	2
647	132	34	9.3	F	OW	616	128	12.86	4	3	4	4	2	3	3	4	5	4	3	4	43	2
648	139	31	9.4	F	NW	730	140	12.87	4	3	4	3	3	4	4	5	5	3	3	3	44	2
649	129	26.5	7.4	F	NW	540	99	17.8	5	4	4	1	1	3	3	4	4	5	5	5	44	2
650	139	34	10	F	NW	800	126	12.6	5	4	4	4	4	5	5	5	4	4	4	4	52	3
651	133	34.5	8.7	F	OW	625	102	13.9	3	3	2	1	5	5	3	3	3	4	3	5	40	1
652	131	30	9.7	F	NW	662	152	13.29	4	3	4	4	5	5	4	5	4	5	4	5	52	3
653	136	27.8	9.9	F	NW	652	143	14.41	5	4	5	5	4	4	5	5	4	5	5	5	56	3
654	140	32	10.8	F	NW	658	142	12.1	5	5	4	3	4	5	5	5	4	5	5	5	55	3
655	136	26	10.8	F	UW	620	133	14.34	4	4	3	5	5	5	4	5	4	4	5	4	52	3
656	128	34	8.5	F	OW	596	105	14.26	4	5	3	1	2	4	5	3	5	4	5	3	44	2
657	109	19	7.3	F	NW	508	99	18.13	3	4	3	3	2	3	3	2	3	3	3	3	35	1
658	139	34.3	9.3	F	NW	771	154	13.08	3	5	3	1	1	3	4	3	3	4	2	5	37	1
659	116	20	6.5	F	NW	543	88	17.85	4	4	3	1	1	4	4	4	4	5	5	5	44	2
660	139.5	30	9.8	F	NW	806	126	12.8	5	4	4	3	3	4	4	4	4	4	4	5	48	3
661	148	43	9.7	F	OW	649	146	12.01	4	3	3	5	4	4	4	4	3	3	5	5	47	3
662	118	23.3	6.5	F	NW	484	104	19.04	5	4	5	1	1	2	1	4	5	5	5	4	42	2
663	131	34	9.3	F	OW	498	113	13.31	4	4	3	3	3	3	4	3	3	4	3	4	41	2
664	115.5	23	6.5	F	NW	482	100	17.59	5	4	4	4	1	4	3	5	4	4	3	3	44	2
665	142.5	33.4	9.8	F	NW	740	110	13.6	3	2	1	3	3	4	3	5	4	4	4	4	40	1
666	130.5	30.5	7.5	F	NW	556	123	15.86	5	4	4	3	3	5	4	5	3	5	3	4	48	3
667	145	46	11.1	F	OW	588	95	15.35	5	4	4	5	5	4	4	4	4	4	5	4	52	3
668	136	35	7.7	F	OW	610	114	13.8	5	5	5	4	5	5	5	4	5	5	5	4	57	3
669	146	30.7	11.1	F	UW	678	110	15.76	4	3	4	5	5	4	4	3	3	5	5	3	48	3
670	131	36	8.7	F	OW	623	106	13.7	4	5	4	1	1	5	2	4	4	5	5	5	45	3
671	151	37.2	11.2	F	NW	560	136	13.43	3	2	3	4	4	4	3	2	3	4	3	4	39	1
672	146	35	9.1	F	NW	715	138	13.8	5	5	4	4	5	5	5	5	5	5	5	5	58	3
673	149	45	9.8	F	OW	600	133	12.16	5	4	5	4	4	5	5	5	5	4	5	4	55	3
674	108	27	6.3	F	OB	445	70	18.37	5	5	5	5	1	1	1	5	5	5	5	5	48	3
675	125	27	9.8	F	NW	760	133	11.4	4	4	4	4	3	3	3	3	4	5	4	5	46	3
676	140	30	9.8	F	NW	680	131	12.6	3	2	1	5	4	4	3	5	3	4	3	4	41	2
677	118	28	6.5	F	OB	465	82	18.83	5	5	4	3	3	5	5	4	4	4	5	5	52	3
678	128	25	9.2	F	NW	526	113	15.53	5	3	4	1	3	5	4	2	1	1	1	4	34	1
679	124	21.5	7	F	NW	620	141	11.7	5	5	5	1	1	1	1	5	5	5	5	5	44	2
680	124	21	7.9	F	UW	480	140	14.1	4	3	3	2	1	3	3	3	4	3	3	3	35	1
681	130	25.6	9.6	F	NW	564	149	13.4	4	2	5	1	3	2	2	4	5	5	1	5	39	1
682	151	40	10.3	F	NW	760	183	10.1	5	4	4	5	5	5	5	4	4	4	5	4	54	3
683	144	30	11.1	F	UW	685	145	12	5	3	4	4	5	4	3	3	5	4	4	3	47	3
684	126	28.8	7	F	OW	570	92	13.9	5	4	4	4	4	5	4	5	4	5	4	4	52	3
685	124	25	6.9	F	NW	524	85	15.73	3	4	2	1	4	3	3	2	3	5	5	5	40	1
686	154	45	11.1	F	NW	780	178	10	5	4	4	3	4	5	5	4	4	3	4	4	49	3
687	141	33	8.7	F	NW	740	115	13.18	5	4	3	5	1	5	4	4	4	5	5	5	50	3
688	140	37.4	9.1	F	OW	620	90	15.84	5	5	4	5	5	4	5	5	4	5	3	3	53	3
689	146	31.7	10.3	F	NW	750	104	13.22	5	3	4	4	4	5	5	4	4	4	4	4	50	3
690	140	28	10.4	F	UW	683	123	13.09	5	3	2	4	1	5	5	3	2	4	4	4	42	2
691	129	26	8.3	F	NW	626	116	15.54	4	3	4	5	4	3	4	3	4	3	5	3	45	3
692	150	43	10.8	F	NW	782	146	11.3	3	3	4	2	2	4	3	4	4	3	3	3	38	1
693	148	29	10.9	F	UW	756	147	11.9	5	5	4	5	5	5	4	5	5	5	5	4	57	3
694	138	32.7	10.5	F	NW	623	129	13.95	4	3	3	2	4	3	3	2	3	3	3	3	36	1
695	128	29	9.5	F	NW	732	136	13.28	5	3	4	5	4	5	4	4	4	4	4	4	50	3
696	135.5	29	10.9	F	NW	617	111	15.62	5	3	2	4	4	4	4	3	3	3	4	5	44	2
697	137	33	9.6	F	NW	728	137	13.4	4	4	3	3	5	5	4	5	4	3	4	4	48	3
698	121	25	7.7	F	NW	673	126	12.7	3	3	3	4	2	4	4	3	5	4	5	3	43	2
699	120	20.6	6.7	F	NW	560	120	15.46	5	5	1	1	1	5	1	5	1	5	5	5	40	1
700	121	27.2	8	F	OW	490	76	18.95	4	4	2	1	1	3	3	4	4	5	5	5	41	2
701	136	42	9	F	OW	570	115	15.92	5	3	3	1	1	1	1	3	5	5	3	3	34	1
702	136	34	9.8	F	NW	684	122	10.9	4	4	4	2	3	4	3	3	4	4	4	4	43	2
703	131	25	8.7	F	NW	654	145	12.7	4	5	4	3	4	5	4	4	5	5	4	4	51	3
704	143	42.6	10.3	F	OW	600	135	14.4	4	3	3	2	2	5	3	4	1	3	3	4	37	1
705	140	36	9.4	F	NW	678	128	14.33	2	1	1	1	3	2	2	2	1	1	3	3	22	1
706	144	38.2	10.3	F	NW	690	98	15.03	4	3	2	4	5	5	3	5	4	4	4	3	46	3
707	135	32	9.6	F	NW	660	130	12.91	4	4	4	4	5	5	5	4	4	5	4	4	52	3
708	139	28	9.8	F	UW	714	137	11.9	4	3	3	4	3	4	4	3	4	4	3	4	43	2
709	117	20	6.3	F	NW	507	93	19.71	5	5	4	5	5	5	5	5	3	5	5	5	57	3
710	134.5	28.5	9.5	F	NW	760	137	13.38	5	3	4	4	5	5	5	5	4	4	4	5	53	3
711	142	55	10.3	F	OB	516	100	14.6	5	4	4	4	5	4	5	4	5	5	4	4	53	3
712	131.5	23.5	9.3	F	UW	725	130	12.99	4	3	3	3	4	5	4	5	2	4	4	4	45	3
713	127	37	9.5	F	OW	568	98	15.36	5	4	5	4	5	5	4	5	4	5	5	5	56	3
714	135	40.1	9.8	F	OW	667.7	139	17.16	4	2	3	1	4	5	5	4	1	3	4	4	40	1
715	143	35	10.2	F	NW	670	130	12.6	5	4	5	4	5	5	5	4	5	4	4	4	54	3
716	149	44.5	9.4	F	OW	672	145	16.05	4	5	4	4	4	5	5	3	4	4	5	3	50	3
717	132.5	27	8.7	F	NW	620	116	12.1	4	4	4	3	4	4	4	5	4	5	5	4	50	3
718	139	34	11	F	NW	560	120	13.34	2	3	2	3	2	4	4	4	2	3	4	4	37	1
719	135	43	9.6	F	OB	640	97	15.53	3	3	3	2	4	3	3	1	4	3	3	3	35	1
720	140.5	34	10.4	F	NW	756	176	10.7	5	4	4	4	5	5	4	5	5	5	4	4	54	3
721	155	36	10.8	F	UW	810	143	11.2	5	4	4	5	5	5	5	5	5	4	4	5	56	3
722	116	18	6.6	F	UW	583	91	16.57	5	4	4	3	2	4	3	4	5	5	4	3	46	3
723	152	71.4	10.3	F	OB	557.4	76	19.22	3	3	1	1	4	3	2	4	5	3	1	2	32	1
724	128	36.1	8.6	F	OW	640	113	16.34	4	3	3	4	5	4	3	3	3	4	4	4	44	2
725	140	45	9.3	F	OW	810	134	11.9	5	4	4	4	5	5	4	4	5	4	4	4	52	3
726	171	55.5	10.8	F	NW	705.3	180	12.71	5	5	3	1	5	4	4	3	3	3	5	4	45	3
727	120	25	6.7	F	NW	616	115	15.5	5	4	3	1	1	2	2	5	2	4	5	4	38	1
728	119.5	22	7.1	F	NW	570	100	18.19	4	5	4	4	5	4	5	4	3	5	3	5	51	3
729	124	26	6.6	F	NW	556	104	15.5	5	5	5	3	3	5	5	5	5	5	5	4	55	3
730	143	40	10.5	F	NW	780	144	10.5	4	4	4	3	5	5	5	4	5	5	4	4	52	3
731	137	31.2	10.5	F	NW	660	111	13.85	4	3	4	1	3	5	5	5	2	4	3	3	42	2
732	144.5	35	9.6	F	NW	698	146	12.63	4	3	3	4	4	3	3	2	4	3	3	3	39	1
733	136	30	9.8	F	NW	699	129	13.06	4	4	3	3	5	5	5	4	5	4	4	4	50	3
734	146	33	10.3	F	NW	637	140	12.94	3	2	2	4	1	4	5	1	5	2	3	5	37	1
735	125	24	7.6	F	NW	650	120	14.23	3	4	3	4	4	5	5	4	4	5	5	5	51	3
736	138	30	9.4	F	NW	754	132	11.66	3	3	4	3	4	4	4	4	5	3	3	3	43	2
737	136	29.8	10.8	F	NW	670	122	14.83	4	4	3	3	4	4	3	4	5	4	4	4	46	3
738	163	45	11.3	F	NW	740	160	13.62	5	4	4	3	3	3	2	4	4	4	4	4	44	2
739	146	33.2	10	F	NW	746	150	13.19	5	4	4	1	3	5	5	4	3	5	5	5	49	3
740	145	37	10.9	F	NW	664	136	13.2	3	4	2	5	3	4	3	2	4	4	5	3	42	2
741	135	32	8.5	F	NW	742	148	12.6	5	5	4	4	5	4	4	5	5	5	5	5	56	3
742	133	43	9.4	F	OB	519	113	12.8	5	3	3	5	4	5	5	3	5	5	4	5	52	3
743	120	22	7.5	F	NW	580	101	16.13	3	4	2	2	2	3	3	5	3	3	4	4	38	1
744	136	23.5	8.8	F	UW	625	100	14	1	4	3	3	2	4	4	5	5	4	5	5	45	3
745	139	30	9.8	F	NW	711	150	12.18	5	4	4	2	4	4	3	5	3	5	4	4	47	3
746	121	21	7.5	F	NW	369	112	19.08	4	3	5	4	5	4	5	5	4	5	4	5	53	3
747	137	32	9.4	F	NW	690	143	12.4	5	3	4	3	3	5	4	4	4	3	5	4	47	3
748	133.5	29	9.3	F	NW	700	112	14.12	4	3	4	4	3	4	4	5	2	3	3	4	43	2
749	129	29	9.7	F	NW	578	138	12.97	3	3	2	3	3	4	2	5	5	3	3	3	39	1
750	132	33	6.6	F	OW	485	80	19.28	5	5	5	5	4	5	5	5	4	5	5	5	58	3
751	138	41.3	10.6	F	OW	701	123	13.69	5	4	4	4	4	4	3	5	5	5	5	5	53	3
752	128	23.7	9.7	F	NW	699	111	14.14	5	4	2	5	4	4	5	5	3	5	5	4	51	3
753	126	28.1	9.1	F	NW	729	99	15.47	4	5	5	5	5	5	5	5	5	5	4	4	57	3
754	121	20	6.9	F	UW	580	83	14.9	4	3	4	3	4	5	5	5	3	5	5	5	51	3
755	136	42	9.1	F	OW	645	98	15.89	5	5	5	1	1	1	1	4	5	5	5	5	43	2
756	116	21	6.1	F	NW	445	104	15.3	5	4	4	3	4	5	5	5	4	5	4	4	52	3
757	116	24	6.5	F	OW	520	93	14.6	3	2	1	2	3	3	1	4	1	3	4	2	29	1
758	139	30	10	F	NW	664	150	12.7	5	5	5	5	5	4	5	5	5	5	5	5	59	3
759	130	24.9	8.8	F	NW	531	129	14.99	4	1	1	3	5	2	5	3	1	5	1	4	35	1
760	133	27.2	9.1	F	NW	619	112	14.32	5	3	4	5	5	5	4	4	3	4	4	5	51	3
761	128	35	7.7	F	OB	654	103	16.17	5	4	5	3	3	4	4	5	5	4	5	4	51	3
762	124	26.6	7.3	F	NW	486	111	16.09	4	4	2	1	1	4	3	3	5	5	4	3	39	1
763	133	28	9.3	F	NW	649	155	11.96	4	4	4	4	4	4	4	4	4	4	4	4	48	3
764	115	22	6.4	F	NW	453	101	13.4	5	4	4	1	1	5	5	5	4	5	4	5	48	3
765	139	32	9.7	F	NW	652	150	12.62	5	5	5	5	5	5	5	5	5	5	5	5	60	3
766	126	31	7.3	F	OW	570	82	15.5	4	5	3	1	1	3	3	5	1	3	4	5	38	1
767	137	25.8	9.7	F	UW	620	114	14.91	5	1	3	2	1	5	2	3	5	4	5	2	38	1
768	132	36	8.8	F	OW	558	95	16.12	4	5	3	1	4	5	5	4	5	4	3	5	48	3
769	139	32.7	11	F	NW	694	101	14.5	4	2	3	4	2	5	5	5	3	2	4	4	43	2
770	146	48	10.8	F	OW	650	112	14.28	4	3	2	2	4	3	2	3	5	4	3	3	38	1
771	133	32	9.6	F	NW	628	172	12.38	5	4	4	5	4	3	4	5	4	3	4	3	48	3
772	137	40	10.8	F	OW	698	109	13.77	5	3	3	1	1	3	5	2	4	5	3	3	38	1
773	136	28.8	10.3	F	NW	624	130	13.21	3	3	4	2	4	4	3	3	5	4	3	3	41	2
774	143	31	9.2	F	NW	674	123	13.72	5	4	5	5	4	5	5	5	4	5	5	5	57	3
775	141	42	11.2	F	OW	546	115	14.6	4	2	4	3	5	4	3	3	5	3	3	4	43	2
776	103	16	6.5	F	NW	500	103	16.4	4	3	2	4	4	4	3	5	3	4	5	4	45	3
777	120	20	8.8	F	UW	606	111	12.72	3	2	2	2	3	2	3	3	2	5	5	5	37	1
778	154	70	11.3	F	OB	610	120	14.03	5	4	4	4	5	4	4	4	4	4	5	5	52	3
779	118	20.5	7.1	F	NW	583	97	17.02	5	5	5	1	1	5	1	5	5	5	5	5	48	3
780	143	43	10.9	F	OW	641	122	11.9	4	3	2	2	3	3	4	2	4	2	3	3	35	1
781	143	32	9.9	F	NW	720	95	14.3	5	5	3	1	1	2	5	4	3	4	5	4	42	2
782	123	29	7.6	F	OW	585	120	14.2	4	3	4	5	3	4	2	3	1	5	4	5	43	2
783	128	22	6.9	F	UW	565	124	17.09	4	2	3	3	5	4	3	3	5	5	4	4	45	3
784	149	41.7	10.9	F	NW	706	130	14.19	4	4	5	4	5	5	5	4	5	4	5	4	54	3
785	138	31.1	9.9	F	NW	769	141	12.33	5	4	4	2	4	5	5	4	5	5	3	4	50	3
786	141.5	45	10.1	F	OW	634	75	15.94	3	2	3	3	3	3	3	3	4	3	4	3	37	1
787	135	34.3	8.3	F	OW	588.4	100	15.71	5	4	3	4	5	5	5	4	5	5	4	5	54	3
788	152	50	10.5	F	OW	568	137	14.94	4	3	4	4	2	4	5	5	3	3	4	3	44	2
789	145	55.2	9.4	F	OB	676	102	14.7	4	2	3	4	1	5	5	3	4	5	4	3	43	2
790	142	36.8	8.8	F	NW	636	143	14.9	5	5	4	5	4	5	4	5	4	5	4	5	55	3
791	141	30	8.7	F	NW	660	124	14.34	5	5	5	5	5	5	5	5	4	5	3	5	57	3
792	148	39	11	F	NW	768	150	12.02	5	4	4	2	2	4	4	3	5	4	4	4	45	3
793	118	20.4	7.2	F	NW	560	110	16.27	3	3	2	2	3	3	4	3	3	3	4	4	37	1
794	142	33	10	F	NW	626	110	14.94	4	4	3	4	3	4	4	4	5	4	4	3	46	3
795	130	40	8.4	F	OB	528	104	13.72	4	2	5	1	3	5	1	5	4	5	5	5	45	3
796	140	34.4	10.5	F	NW	664	120	15.03	5	4	4	3	4	5	5	4	4	5	5	5	53	3
797	119	21	7.2	F	NW	520	90	18.13	5	5	5	5	1	3	1	3	5	3	3	3	42	2
798	157	62.8	10.3	F	OB	540	104	18.04	4	3	4	1	4	4	4	4	5	5	5	4	47	3
799	148	34	10.7	F	NW	620	150	12.32	5	3	4	2	3	3	4	3	4	4	4	4	43	2
800	143	45	9.6	F	OW	662	124	14.16	5	4	4	5	5	5	5	5	5	5	5	5	58	3
801	133	30.5	8.3	F	NW	576	151	15.45	5	4	3	1	4	5	4	5	5	5	5	3	49	3
802	127.5	24	7.5	F	NW	538	127	15.25	4	3	4	1	1	4	2	5	5	4	5	4	42	2
803	123	25	7.6	F	NW	624	123	14.37	3	2	3	3	2	3	1	4	5	4	5	5	40	1
804	124	25	7.9	F	NW	567	103	15.92	3	3	2	3	3	3	2	3	4	5	3	3	37	1
805	125	30	8	F	OW	594	115	15.66	4	4	3	3	5	4	4	4	3	4	2	5	45	3
806	126	20	8.2	F	UW	611	90	16.56	3	2	2	1	1	3	2	3	2	3	3	3	28	1
807	136	36	9.6	F	OW	718	132	14.08	4	2	2	1	3	4	3	4	2	3	4	4	36	1
808	137	37	9.1	F	OW	618	116	13.31	4	4	5	4	4	5	5	5	5	4	5	5	55	3
809	131	46.5	8.4	F	OB	508	117	16.09	4	5	4	1	5	4	4	5	5	4	5	4	50	3
810	137	37	9.1	F	OW	700	121	12.84	4	3	3	5	4	4	4	4	5	5	2	5	48	3
811	139	31.4	10.7	F	NW	664	148	13.3	4	4	4	3	4	4	3	5	4	3	5	4	47	3
812	122	22	8.4	F	NW	650	118	15.4	5	1	4	5	4	5	5	4	1	5	4	5	48	3
813	112	18	7.4	F	NW	555	73	18.72	4	3	3	4	4	4	4	3	3	4	4	4	44	2
814	132	24	8.5	F	UW	614	132	14.47	5	5	4	5	5	5	5	4	4	5	5	5	57	3
815	133	27	10.8	F	NW	656	121	13.59	5	4	4	2	4	4	5	5	4	5	4	4	50	3
816	128	24	8.3	F	NW	635	136	12.5	3	2	3	4	3	4	3	4	5	4	4	5	44	2
817	145	46	10.3	F	OW	670	129	12.31	5	4	2	3	1	4	3	3	5	4	3	2	39	1
818	109	19	6.4	F	NW	540	113	15.3	5	3	3	2	1	1	1	5	4	5	5	5	40	1
819	132	35	8.3	F	OW	606	86	14.2	4	3	3	3	4	4	4	4	5	3	4	4	45	3
820	128	22	8	F	UW	578	142	15.26	4	1	2	2	2	5	5	5	5	4	4	4	43	2
821	135	27.8	10	F	NW	632	81	15.5	5	5	5	1	1	4	4	5	4	4	5	5	48	3
822	120	21.6	7.8	F	NW	626	150	14.44	5	5	5	1	1	5	5	3	5	5	5	5	50	3
823	137	33	9.9	F	NW	780	132	13.75	5	2	1	4	5	5	5	5	5	4	5	3	49	3
824	149	33.5	10.6	F	NW	780	144	12.01	5	4	4	5	5	4	4	3	5	5	4	4	52	3
825	133	26.8	8.9	F	NW	662	120	13.02	5	4	3	5	2	5	4	5	5	4	5	5	52	3
826	142.5	41.5	11.3	F	NW	661	137	14.16	5	3	4	4	5	5	4	4	5	5	4	3	51	3
827	145	40	10.2	F	NW	542	145	15.21	3	5	4	3	2	5	3	3	2	5	4	3	42	2
828	148	50	11	F	OW	582	119	13.5	4	1	1	1	3	2	1	4	3	2	2	3	27	1
829	130	30	6.8	F	OW	500	72	22.1	4	3	5	5	5	4	5	4	5	5	5	5	55	3
830	133	30	7.8	F	NW	676	100	17.45	3	3	4	4	4	4	5	5	5	5	5	5	52	3
831	133	34	10	F	NW	562	115	14.3	5	4	4	4	5	5	5	4	5	5	5	5	56	3
832	127	28.6	7.3	F	NW	512	100	18.06	3	4	4	3	4	3	4	3	4	4	5	5	46	3
833	125	23	9.3	F	NW	476	100	14.61	5	5	5	1	1	4	4	5	5	5	5	5	50	3
834	127	28	8.3	F	NW	670	143	12	3	5	3	1	1	4	5	3	5	4	4	3	41	2
835	126	31	7.2	F	OW	578	106	13.75	4	4	4	3	4	3	3	3	4	3	4	4	43	2
836	129.5	28	9.2	F	NW	623	96	13.2	5	5	5	5	5	5	5	5	5	5	5	5	60	3
837	133	29	10.8	F	NW	640	113	16	4	3	4	2	3	3	3	3	4	4	4	3	40	1
838	132	27.1	8.3	F	NW	696	122	13.93	4	3	4	4	4	4	3	3	4	5	4	4	46	3
839	121	30	7.4	F	OW	470	110	15.93	3	3	5	1	1	1	1	4	5	5	5	5	39	1
840	122	24.8	6.6	F	NW	512	120	17.01	4	3	2	3	2	3	4	4	4	3	4	5	41	2
841	111	17	6.7	F	UW	508	92	18.66	5	5	4	3	4	4	3	3	3	5	5	4	48	3
842	150	42	11.3	F	NW	706	153	11.4	4	2	2	4	4	3	3	4	5	4	3	5	43	2
843	151	33	10.7	F	UW	643	165	13.99	4	3	4	4	5	4	3	5	4	4	5	4	49	3
844	124	22.9	7.6	F	NW	572	117	17.67	5	3	3	1	1	4	4	4	5	5	5	5	45	3
845	133	26	9.5	F	NW	800	155	11	5	4	5	4	4	5	5	5	5	5	5	5	57	3
846	124	26.6	6.4	F	NW	508	129	17.91	5	4	4	5	4	3	4	4	5	5	5	5	53	3
847	155	45	11.2	F	NW	715	159	13.81	5	4	4	3	5	4	3	4	4	5	4	4	49	3
848	135	31	11.1	F	NW	660	152	13.7	5	4	3	3	4	5	3	3	3	4	4	3	44	2
849	130	26.2	10.3	F	NW	630	140	14.3	4	4	3	4	5	4	4	5	5	5	4	4	51	3
850	136	25	9.8	F	UW	684	136	15.15	5	5	4	4	4	4	5	5	5	5	5	4	55	3
851	135	34	8.5	F	NW	615	120	15.1	5	4	5	3	2	5	5	4	4	5	5	4	51	3
852	135.5	38	9.3	F	OW	711	141	12.5	3	4	3	2	5	4	3	4	3	3	4	3	41	2
853	138	46	9.1	F	OB	492	112	17	4	4	4	3	3	3	5	5	5	5	5	5	51	3
854	114	20	6.6	F	NW	542	105	19.81	5	4	3	5	5	4	4	5	4	5	4	5	53	3
855	124	29.2	8.3	F	OW	538	106	15.78	5	4	5	1	1	4	4	5	5	5	5	5	49	3
856	140	28.5	10.6	F	UW	795.2	144	13.54	5	5	5	1	5	5	5	5	5	5	5	5	56	3
857	118	21	6.3	F	NW	520	98	15.72	5	4	5	3	5	3	1	4	3	3	3	3	42	2
858	129	33.4	9.7	F	OW	564	120	15.85	3	3	4	4	4	3	4	3	4	4	3	3	42	2
859	125	23	8.1	F	NW	580	108	15.12	5	4	4	5	3	5	5	5	5	5	5	5	56	3
860	125	19.9	8	F	UW	586	136	16.95	5	4	5	1	2	4	4	4	4	5	5	5	48	3
861	132	29	8.3	F	NW	664	115	13.66	4	3	4	4	4	5	4	5	4	5	4	5	51	3
862	123.5	27	6.9	F	NW	580	103	13.6	4	4	4	3	3	2	2	4	5	5	5	5	46	3
863	120	16	7	F	UW	663	102	15.6	4	4	5	3	3	5	4	4	3	4	4	4	47	3
864	141	25	10.3	F	UW	641	138	13	5	3	4	1	5	5	4	5	3	5	5	5	50	3
865	129	28	9.3	F	NW	594	120	15.6	4	2	5	1	5	5	4	3	5	4	5	5	48	3
866	123	31	7	F	OW	553	89	15.89	5	5	4	1	1	4	4	5	4	5	3	4	45	3
867	118	23.6	6.7	F	NW	490	115	17.48	4	4	4	3	4	5	4	5	3	4	5	5	50	3
868	136	30.5	9.8	F	NW	580	156	12.6	5	4	4	5	5	4	4	5	4	4	5	4	53	3
869	127	24	8.4	F	NW	618	111	13.5	5	4	4	5	3	5	5	3	4	5	5	5	53	3
870	134	29.5	10	F	NW	669	137	13.94	4	4	3	4	5	3	4	4	5	4	4	4	48	3
871	156	55	11.2	F	OW	628	144	11.93	5	4	3	3	3	4	3	3	4	3	4	4	43	2
872	146	38	10.8	F	NW	735	158	12.3	3	2	3	3	4	4	4	5	4	3	4	4	43	2
873	155	41.5	11.1	F	NW	760	191	10.1	5	4	5	3	5	4	5	5	4	5	4	4	53	3
874	144	28.8	10.1	F	UW	713.4	115	14.79	4	2	4	3	5	5	3	4	5	4	5	4	48	3
875	129	31	8.6	F	NW	720	99	13.9	5	2	1	3	5	5	5	5	2	4	2	3	42	2
876	128	25	9.3	F	NW	727	136	13	4	3	4	3	4	3	3	5	4	5	5	5	48	3
877	134	30.9	8.1	F	NW	597.1	74	15.34	3	4	2	2	3	3	5	4	3	4	4	3	40	1
878	133.5	30	10.4	F	NW	770	139	13.34	5	3	4	5	5	5	5	3	4	5	5	4	53	3
879	127	24	7	F	NW	536	113	16	3	3	5	1	1	5	5	5	4	5	5	5	47	3
880	124	22.9	7.7	F	NW	556	137	15.56	5	5	4	1	1	3	3	4	5	5	5	4	45	3
881	133	30	8	F	NW	710	114	14.3	4	4	4	4	5	4	4	4	5	5	5	5	53	3
882	131.5	29	7.8	F	NW	532	88	17.43	5	3	3	1	5	4	5	5	5	5	5	5	51	3
883	128	25.6	8.6	F	NW	636	131	13.15	3	4	3	1	2	4	4	4	3	5	5	4	42	2
884	127	25	7	F	NW	530	95	16.35	5	5	5	4	4	4	4	5	5	5	5	5	56	3
885	150	36.3	10.6	F	NW	650	133	16.14	5	5	4	5	5	5	4	5	5	5	5	5	58	3
886	134	26	8.2	F	NW	548	88	14.72	5	4	3	1	5	5	5	4	5	4	5	5	51	3
887	146	50.2	8.8	F	OB	530	76	16.45	3	2	1	3	1	4	3	2	1	5	3	5	33	1
888	146	41	10.3	F	NW	717	115	14.23	5	4	4	5	4	5	5	5	5	5	4	5	56	3
889	150.5	38	10.7	F	NW	570	150	12.63	5	3	5	1	1	3	2	4	2	3	5	5	39	1
890	133	30	11.5	F	NW	650	120	13.1	2	2	4	2	3	4	4	3	4	4	4	4	40	1
891	134	34	10.2	F	NW	680	131	12.43	4	5	4	5	5	4	5	5	5	4	5	5	56	3
892	122	23.2	8.9	F	NW	675	104	13.68	3	4	3	5	4	5	5	2	2	4	5	4	46	3
893	147.5	41	8.7	F	OW	500	122	13.5	4	3	3	1	1	4	3	5	4	3	2	4	37	1
894	119	22	6.5	F	NW	512	101	17.21	5	5	5	5	3	5	5	5	5	5	4	5	57	3
895	129.5	27	9.3	F	NW	597	172	11.97	4	3	2	3	5	4	5	4	3	4	5	4	46	3
896	134	28	10.3	F	NW	640	120	12.7	4	3	4	4	4	4	5	4	4	4	3	4	47	3
897	141	30	8.4	F	NW	600	110	14.33	4	4	5	1	1	1	1	4	5	4	3	5	38	1
898	121	28.2	7.5	F	OW	540	105	17.09	4	2	2	1	4	3	3	5	2	4	3	3	36	1
899	136	27	9.6	F	NW	740	150	13.16	3	2	3	4	3	4	4	2	4	5	3	3	40	1
900	134	23	8.3	F	UW	700	120	15.06	5	5	4	5	5	5	4	5	5	5	5	4	57	3
901	149	34.1	10.6	F	NW	676	149	13.12	5	3	4	4	3	4	4	3	5	4	4	4	47	3
902	126	25	7.6	F	NW	690	103	12.9	4	3	4	3	3	4	3	4	4	3	4	3	42	2
903	128	24	7.6	F	NW	620	125	11.6	5	5	4	4	5	5	5	5	5	5	5	5	58	3
904	145.5	43	10.8	F	NW	630	112	13.5	5	4	5	3	3	4	4	4	5	4	4	4	49	3
905	110	18	6.8	F	NW	510	102	19.63	3	3	2	2	3	4	3	4	4	4	4	5	41	2
906	121	21	6.4	F	NW	485	80	17.94	5	4	3	3	2	3	4	4	4	4	4	3	43	2
907	134.5	25	10.1	F	UW	712	141	12.8	4	4	3	4	5	5	4	5	4	3	4	5	50	3
908	134	41	10	F	OW	620	84	16.15	4	3	4	1	4	5	4	4	5	5	4	4	47	3
909	141	35	8.7	F	NW	738	103	15.33	5	5	4	5	4	5	5	5	3	5	5	5	56	3
910	123	20	7.8	F	UW	568	100	14.59	4	5	4	1	1	4	4	5	5	5	5	5	48	3
911	155	54	11.1	F	OW	703	141	12.6	3	3	2	3	2	4	1	4	3	3	4	3	35	1
912	144	34	9.8	F	NW	712	130	13.42	4	3	2	1	3	5	4	4	5	3	4	3	41	2
913	148	45	11.2	F	NW	539	150	13.52	5	4	4	4	5	5	5	5	5	4	4	4	54	3
914	128	26	8.7	F	NW	610	114	14.68	5	5	3	1	1	1	1	5	3	5	5	5	40	1
915	131	37.6	7.9	F	OB	670	121	15.56	5	5	5	1	1	5	5	5	5	5	4	5	51	3
916	136	30	7.8	F	NW	720	129	12.4	4	3	4	4	5	5	3	4	4	4	5	5	50	3
917	145	41	10.7	F	NW	616	103	14.2	4	2	4	3	4	4	4	4	5	5	4	3	46	3
918	139	34	10.5	F	NW	806	113	12.8	5	3	3	2	2	3	3	3	4	3	4	4	39	1
919	145	55	10.8	F	OB	709	115	13.9	5	5	5	5	5	5	5	5	5	5	5	5	60	3
920	142	37.6	10	F	NW	680	104	14.84	5	4	5	4	4	4	4	5	5	5	5	5	55	3
921	116	22	8.3	F	NW	586	98	16.14	4	4	3	3	3	3	3	5	5	5	5	5	48	3
922	143	45	10.8	F	OW	660	126	12.5	5	3	3	3	4	4	3	4	4	3	5	5	46	3
923	133	29	9.8	F	NW	834	132	12.5	5	5	5	5	4	5	4	5	5	5	4	4	56	3
924	128	26	8.4	F	NW	650	129	13.3	5	4	3	3	3	4	5	3	4	4	4	4	46	3
925	133	38	8.3	F	OW	590	120	14.3	4	3	2	1	1	2	1	2	4	3	3	4	30	1
926	128.5	25	10	F	NW	759	142	12.42	4	5	4	3	3	5	4	4	4	4	4	4	48	3
927	134	31	10.3	F	NW	766	130	12.5	4	4	5	5	5	5	4	4	5	4	4	4	53	3
928	125	25.7	8	F	NW	778	130	13.27	5	1	3	5	5	5	5	4	3	5	4	5	50	3
929	137	34	8.5	F	NW	613	109	14.82	5	3	5	1	1	1	1	5	3	5	5	5	40	1
930	134	24	9.1	F	UW	678	95	13.07	5	5	4	5	5	5	5	5	4	5	5	5	58	3
931	120	24	7.7	F	NW	580	125	13.13	5	3	4	5	4	5	5	4	5	5	3	5	53	3
932	146	48.8	9.7	F	OW	561	96	15.44	2	2	3	2	4	2	3	2	3	4	4	3	34	1
933	143	52	9.4	F	OB	640	115	14.37	4	4	4	4	4	5	5	5	3	4	4	4	50	3
934	154	56.4	10.2	F	OW	706	107	14.64	5	4	3	2	5	5	4	4	5	4	5	5	51	3
935	127	29	6.8	F	OW	530	109	14.84	5	4	4	5	4	5	5	4	4	4	5	4	53	3
936	140	30.6	10.6	F	NW	676	141	15.91	5	4	2	2	3	3	4	4	4	5	5	3	44	2
937	148	35	10.5	F	NW	756	179	12.44	1	2	1	4	3	5	5	3	4	4	5	4	41	2
938	131.5	27	10.2	F	NW	712	116	12.34	4	3	1	5	5	3	5	4	3	4	1	3	41	2
939	140	32	10	F	NW	734	150	14.5	3	3	4	3	2	5	3	4	5	5	3	3	43	2
940	131	39	9.2	F	OW	680	124	14.17	4	3	3	4	3	4	4	5	4	4	4	4	46	3
941	138	28.3	10.8	F	UW	576	126	15.2	3	4	4	2	3	5	5	2	4	4	4	5	45	3
942	143	32	10.9	F	NW	696	180	10.96	5	5	5	4	4	5	5	4	5	4	5	5	56	3
943	139	38	9	F	OW	460	97	15.2	3	4	3	3	3	5	5	3	3	3	3	3	41	2
944	157	59	10.5	F	OW	703	116	15.7	4	3	4	3	3	4	3	4	4	3	3	3	41	2
945	134	30	8.7	F	NW	480	84	14.16	5	5	3	1	1	1	1	5	5	5	5	5	42	2
946	119.5	24	8	F	NW	564	96	15.35	3	2	2	1	1	3	2	3	3	4	4	4	32	1
947	126	45	6.9	F	OB	515	93	15.6	3	4	3	2	3	3	3	4	4	5	4	3	41	2
948	116	30	6.4	F	OB	569	70	18.96	3	3	2	2	3	3	3	3	3	4	3	4	36	1
949	149	46	9.8	F	OW	663	132	13.2	5	4	4	3	5	4	4	5	5	4	5	4	52	3
950	122	26.3	9.2	F	NW	496	125	14.06	5	3	4	1	1	5	5	5	5	5	5	4	48	3
951	144	35	10.5	F	NW	610	111	12.8	2	1	1	2	4	2	3	1	2	3	1	1	23	1
952	135	34	10.3	F	NW	688	133	13.3	5	4	4	5	5	5	5	4	4	5	5	5	56	3
953	122	22.8	6.8	F	NW	562	117	14.53	3	4	5	2	1	5	2	4	5	2	5	5	43	2
954	126	35	9.3	F	OW	625	119	13.6	5	4	3	4	4	4	3	4	3	4	3	4	45	3
955	128	24.9	9.8	F	NW	538	109	14.55	5	5	4	1	1	4	5	5	5	5	4	5	49	3
956	136.5	41	9.5	F	OW	680	98	13.97	4	3	3	3	5	4	3	3	3	3	3	3	40	1
957	141	35	11	F	NW	680	144	11.66	4	4	3	3	3	4	4	3	4	4	4	4	44	2
958	143	48.6	9.7	F	OB	673	148	15.32	4	4	3	4	4	5	5	4	5	4	3	3	48	3
959	144	43.5	9.3	F	OW	825	169	14.1	5	4	4	3	3	5	4	5	5	4	4	5	51	3
960	135	25	9.5	F	UW	741	165	11.5	3	5	4	4	5	5	4	3	5	2	5	2	47	3
961	139	28.6	10.3	F	UW	680	143	13.17	4	4	4	5	5	5	5	5	5	5	5	5	57	3
962	119	21.9	6.6	F	NW	548	89	15.18	5	5	4	1	5	5	3	5	5	4	2	5	49	3
963	124	22.3	8.5	F	NW	588	136	14.58	5	4	5	1	4	5	5	4	4	5	5	5	52	3
964	134	30	8.5	F	NW	600	112	14.5	3	4	3	3	2	4	4	3	5	4	3	3	41	2
965	140	43.6	8	F	OB	640	126	15.84	4	3	3	5	4	3	5	5	1	3	4	4	44	2
966	154	55	10.9	F	OW	595	120	15.28	5	4	4	5	3	3	4	5	4	5	4	5	51	3
967	122	23.4	6.9	F	NW	458	99	21.25	5	2	2	4	3	3	3	3	4	4	4	4	41	2
968	142	50	10.3	F	OB	620	112	14.65	3	3	4	3	2	4	5	4	5	3	3	3	42	2
969	128	25.2	9.9	F	NW	648	151	14.05	5	4	4	1	5	5	5	4	3	5	5	5	51	3
970	137	26.9	10.9	F	UW	772.9	148	14.35	4	3	3	2	5	4	3	4	3	4	4	4	43	2
971	133	40	10.8	F	OW	680	149	13.56	4	4	5	3	3	4	4	3	3	3	3	4	43	2
972	157	50	10.4	F	NW	690	135	13.09	5	2	3	2	4	4	4	5	4	3	5	4	45	3
973	143	35	9.9	F	NW	698	142	13.16	4	3	3	5	5	5	5	4	4	4	3	4	49	3
974	125	28	6.9	F	OW	560	123	16.35	3	4	4	5	3	5	5	4	4	4	4	4	49	3
975	122	24.1	8.1	F	NW	733	130	13.13	5	3	4	4	3	5	3	5	5	4	5	3	49	3
976	129	25	9.6	F	NW	567	118	13.03	4	4	4	3	3	5	5	4	5	4	5	4	50	3
977	139	36	10.5	F	NW	746	146	12.1	5	4	4	4	5	5	5	5	5	5	5	5	57	3
978	146.8	45.3	10.6	F	OW	623	115	16.43	4	4	4	5	5	4	4	3	5	4	4	4	50	3
979	128	31	7.3	F	OW	541	65	16.36	4	4	3	1	1	4	4	4	5	5	5	4	44	2
980	142	40.5	10	F	OW	743	113	13	5	4	3	5	3	4	5	4	5	5	4	5	52	3
981	131	27	10.4	F	NW	614	135	12.27	4	3	4	3	3	3	4	5	4	5	5	4	47	3
982	138	33	9.9	F	NW	570	123	14.5	5	4	4	5	5	4	5	3	4	5	5	4	53	3
983	131	29	9.6	F	NW	725	144	12.1	5	3	4	4	3	5	5	5	4	5	5	5	53	3
984	131	25.1	9.4	F	NW	625.4	95	15.52	5	5	3	1	1	5	1	2	5	4	5	5	42	2
985	163	32	10.9	F	UW	530	145	12.9	5	5	5	5	5	5	5	5	5	5	5	5	60	3
986	132	35	8.3	F	OW	581	105	16.75	5	4	4	1	1	5	3	4	4	5	4	5	45	3
987	132	30.4	8.8	F	NW	628	107	16.2	5	4	3	1	3	1	4	4	3	4	4	5	41	2
988	118	24	6.3	F	NW	590	108	15.4	5	5	5	5	5	5	5	5	5	5	5	5	60	3
989	131	27	11	F	NW	730	164	11.3	5	5	4	4	5	5	5	5	5	4	5	4	56	3
990	134	26.7	9.3	F	NW	760	157	11.59	3	2	3	3	4	4	4	4	4	4	2	3	40	1
991	141.5	33	10.8	F	NW	896	165	13.09	5	4	4	3	5	4	5	4	5	5	5	4	53	3
992	134	33.5	9.8	F	NW	705	105	13.57	4	5	4	4	3	5	5	4	4	4	4	4	50	3
993	129	28	8.3	F	NW	618	109	17	3	5	3	1	1	5	1	3	3	5	5	5	40	1
994	128	35	7.3	F	OB	588	106	14.94	4	3	5	1	4	4	5	3	5	5	5	5	49	3
995	137	31	8.8	F	NW	628	133	12.6	4	3	3	3	5	4	4	5	3	4	5	4	47	3
996	133	27	7.5	F	NW	466	100	14.75	5	5	5	4	4	5	5	4	5	5	4	5	56	3
997	149	48.1	11.2	F	OW	747	126	12.21	4	4	5	1	4	5	1	4	5	4	5	5	47	3
998	148	40	10.8	F	NW	760	172	10.6	4	3	4	3	2	4	5	5	5	4	5	4	48	3
999	125.5	29	7.8	F	OW	544	106	13.96	4	4	4	1	1	5	5	4	4	5	5	5	47	3
1000	125	23.6	7.8	F	NW	552	91	22.33	5	4	4	1	1	4	4	3	4	5	5	5	45	3
1001	128	25.5	6.9	F	NW	512	90	20.61	4	4	3	3	4	4	4	5	5	5	4	4	49	3
1002	110	20	6.8	F	NW	520	100	14	3	3	2	2	3	3	3	3	3	4	3	4	36	1
1003	140	36	10.6	F	NW	803	144	12.9	5	4	5	5	5	5	5	5	5	5	5	5	59	3
1004	132	28.9	9.4	F	NW	658	104	14.52	3	2	3	3	3	3	3	3	4	3	3	3	36	1
1005	123	22	7.9	F	NW	575	119	14.1	5	3	4	2	2	2	2	5	5	5	5	5	45	3
1006	119	20.8	6.9	F	NW	510	82	18.07	3	2	2	3	3	3	4	3	3	4	4	4	38	1
1007	118	22.6	6.8	F	NW	500	108	14.75	4	2	3	1	2	5	3	5	1	3	5	4	38	1
1008	126	22.4	7.3	F	NW	634	137	14.79	5	5	5	1	1	3	3	5	5	4	5	5	47	3
1009	152	63	10.6	F	OB	766	155	12.5	5	4	5	3	5	5	5	5	4	5	4	4	54	3
1010	127	27.4	6.9	F	NW	605	122	15.51	5	5	4	1	5	2	3	4	4	5	3	4	45	3
1011	145	36	10.8	F	NW	613	110	15.74	5	2	3	1	3	2	4	3	3	3	3	1	33	1
1012	132	30	9.9	F	NW	560	80	13.7	1	3	2	4	5	3	4	3	2	3	2	2	34	1
1013	123	20	7.1	F	UW	580	121	14.7	5	4	4	4	4	5	5	4	5	5	5	5	55	3
1014	155	37	11.3	F	NW	670	145	13.5	5	4	4	3	4	5	4	4	3	5	5	5	51	3
1015	134	25.4	11	F	UW	728	167	12.27	5	5	4	5	4	5	5	5	3	5	5	5	56	3
1016	117.5	24	6.5	F	NW	463	95	16.63	4	3	4	2	3	4	3	4	4	5	3	4	43	2
1017	146	44.4	10.9	F	OW	720	186	12.8	4	4	4	4	5	4	4	4	5	4	4	4	50	3
1018	156	53.8	11.2	F	OW	646.6	136	12.11	5	4	5	4	5	4	5	3	4	5	4	5	53	3
1019	134.5	26	9.6	F	UW	672	133	12.94	4	4	4	4	5	5	4	4	5	5	5	4	53	3
1020	142	39	10.8	F	NW	722	140	12	5	4	4	3	5	4	5	4	3	4	3	4	48	3
1021	138.5	39	10.3	F	OW	710	132	12.4	5	4	3	2	4	3	5	5	5	4	3	3	46	3
1022	148	48	10	F	OW	720	141	14.3	5	4	4	5	5	5	5	5	5	5	5	5	58	3
1023	160	55	10.9	F	OW	690	120	14.28	5	4	5	3	3	5	5	3	5	5	4	5	52	3
1024	127	27	10.6	F	NW	858	151	12.1	5	4	4	3	4	5	4	4	4	4	4	4	49	3
1025	126	27	8.4	F	NW	579	105	15.63	4	3	4	4	5	4	4	5	4	5	4	3	49	3
1026	141	35	10.2	F	NW	637	127	12.48	5	5	4	4	4	5	5	5	5	5	5	4	56	3
1027	124	28	7.8	F	NW	542	115	14.93	3	2	2	1	1	3	2	3	2	3	3	3	28	1
1028	138	38	9.8	F	OW	585	99	14.6	5	5	5	5	4	5	5	5	5	4	4	4	56	3
1029	148	41	11.1	F	NW	779	154	11.7	5	4	4	3	5	5	5	4	3	3	3	3	47	3
1030	129.5	29	6.7	F	NW	516	83	17.35	5	4	5	4	5	5	5	4	4	5	5	5	56	3
1031	124	27.3	7	F	OW	560	117	14.65	4	5	4	1	1	5	3	4	4	5	5	5	46	3
1032	140	31	9.8	F	NW	626	116	14.56	3	4	1	3	5	2	1	5	1	3	4	3	35	1
1033	118	24	6.8	F	NW	449	100	15.84	4	5	5	2	2	3	2	3	5	5	5	5	46	3
1034	146	37	10.8	F	NW	621	171	12.41	5	4	3	3	5	5	4	5	5	5	5	5	54	3
1035	139	31.2	9.9	F	NW	638	104	14.88	4	3	5	3	4	4	4	3	5	3	4	4	46	3
1036	138	22.1	10.3	F	UW	656	113	14.75	5	2	4	5	1	5	4	5	3	4	3	5	46	3
1037	137	32	11.1	F	NW	740	168	13	5	5	4	5	4	5	5	5	5	4	5	5	57	3
1038	140	32	10.7	F	NW	720	148	11.2	5	4	4	4	5	4	5	5	4	4	4	4	52	3
1039	128	25	8.8	F	NW	534	110	15.88	5	4	4	4	5	5	5	5	5	5	5	5	57	3
1040	134	32	8.4	F	NW	720	128	15	5	4	4	1	3	5	2	4	2	4	4	4	42	2
1041	132	29	9.7	F	NW	700	124	13.06	4	3	3	4	4	3	3	2	4	3	3	3	39	1
1042	136.5	26	9.8	F	UW	737	125	11.75	5	4	4	5	3	4	4	5	4	4	4	5	51	3
1043	131	39	8.3	F	OB	584	83	16.1	4	1	3	2	3	1	3	5	4	2	4	5	37	1
1044	119	29	7.7	F	OW	665	113	13.3	4	4	4	1	2	2	2	2	4	5	5	5	40	1
1045	147	42	9.7	F	NW	674	122	14.74	4	5	4	5	4	5	4	5	5	5	5	4	55	3
1046	125	23	8.3	F	NW	580	98	13.57	5	3	4	2	5	3	4	5	3	3	4	2	43	2
1047	145	49.6	9.3	F	OB	582	115	13.73	4	5	5	5	5	4	4	5	5	4	4	4	54	3
1048	144	43	9.1	F	OW	620	90	14.56	2	3	1	3	3	4	3	4	4	4	3	3	37	1
1049	128	27	9.4	F	NW	601	143	12.1	2	3	1	4	5	3	5	2	1	5	4	3	38	1
1050	140	36.5	9.7	F	NW	636.6	139	13.89	5	5	3	4	3	5	4	4	3	4	4	4	48	3
1051	143.5	39.2	10.8	F	NW	683	148	12.04	5	4	4	4	5	5	5	3	4	3	4	4	50	3
1052	140	27	9.8	F	UW	667	145	12.88	4	3	3	1	2	5	4	4	3	3	4	4	40	1
1053	138	48.8	6.8	F	OB	468	72	17.1	5	3	4	1	1	4	4	5	1	5	5	5	43	2
1054	143	27	9.6	F	UW	800	126	12.8	5	4	3	4	5	4	4	4	5	4	5	5	52	3
1055	136	33	10	F	NW	586	116	15.3	4	5	3	5	5	5	4	5	4	5	4	5	54	3
1056	118	20.6	6.4	F	NW	564	79	16.6	5	4	5	3	5	5	5	5	4	5	5	1	52	3
1057	137	33	9.9	F	NW	768	121	12.7	4	4	5	5	5	4	4	4	4	4	5	5	53	3
1058	136	33.8	9.6	F	NW	660	157	13.97	4	5	5	3	4	5	5	5	5	5	5	4	55	3
1059	146	34	10.8	F	NW	840	197	10.4	5	5	4	5	5	5	5	5	5	4	5	5	58	3
1060	119	25	6.7	F	OW	480	88	15.3	4	5	3	1	1	4	4	5	5	5	5	5	47	3
1061	145	38.4	9.6	F	NW	716	135	12.38	4	4	3	4	3	4	4	4	4	4	3	4	45	3
1062	137	29	8.5	F	NW	561	160	11.85	5	5	3	1	1	1	1	5	3	5	3	3	36	1
1063	130	27	7.9	F	NW	670	102	13.4	5	5	5	1	3	2	2	5	5	5	5	5	48	3
1064	145	43	10.6	F	OW	548	128	14.3	5	4	3	3	4	4	5	3	2	2	4	4	43	2
1065	144	32	10.3	F	NW	745	92	14.99	5	5	4	4	5	5	5	5	5	4	5	4	56	3
1066	128	25	8	F	NW	524	90	16.25	4	4	4	4	2	3	4	3	3	4	4	4	43	2
1067	143	40	10.8	F	NW	480	119	16.56	4	3	3	4	5	3	4	5	5	4	5	4	49	3
1068	141	39.8	10.3	F	NW	620	110	13.23	4	4	3	3	4	4	5	5	4	4	5	4	49	3
1069	140	29	9.3	F	NW	820	117	12.3	5	4	5	3	5	5	4	3	5	5	5	4	53	3
1070	142.5	50	9.9	F	OB	580	115	15.22	4	4	3	3	4	4	3	3	4	4	4	4	44	2
1071	143	34	10.5	F	NW	612	155	14.69	4	2	2	1	3	2	2	3	4	5	5	3	36	1
1072	141	37.4	10.6	F	NW	644	112	13.6	4	3	2	4	5	4	4	5	3	3	3	4	44	2
1073	136.5	30.1	10.9	F	NW	788	164	11.16	3	4	4	1	5	3	2	3	3	4	3	3	38	1
1074	129	35	6.3	F	OB	542	94	18.32	5	4	4	3	3	3	3	4	4	5	5	5	48	3
1075	136	27.7	10.9	F	UW	800	175	11.38	4	3	3	2	4	3	2	3	2	3	3	3	35	1
1076	127	30	9.3	F	NW	766	130	13.6	2	2	2	3	5	4	2	2	2	2	4	4	34	1
1077	127	28	9	F	NW	520	102	16.25	5	4	4	5	5	4	4	5	4	5	5	5	55	3
1078	141	36	11.1	F	NW	760	122	12	3	3	3	2	3	3	3	3	4	3	2	3	35	1
1079	126	25.8	8.5	F	NW	684.6	96	14.44	5	4	4	5	4	4	4	4	5	4	5	5	53	3
1080	133	31	10.8	F	NW	733	147	11.3	4	5	3	2	4	5	4	3	5	3	5	4	47	3
1081	140	36.5	10	F	NW	649	120	13.13	3	2	2	1	4	2	2	2	2	5	3	2	30	1
1082	119	21	6.3	F	NW	606	90	15.93	5	3	4	1	1	2	3	5	4	5	5	5	43	2
1083	122	31	6.6	F	OB	550	100	16.7	4	3	3	1	1	1	1	2	1	5	2	3	27	1
1084	136	32.1	11.2	F	NW	684	121	13.69	5	2	2	3	1	3	4	5	5	5	4	4	43	2
1085	118	21	7.1	F	NW	522	95	14.43	4	3	4	4	4	4	4	4	4	4	4	5	48	3
1086	131	34	7.8	F	OW	574	112	13.19	4	3	4	4	3	4	4	5	4	5	5	4	49	3
1087	142	50	11.1	F	OW	621	100	15.44	4	5	2	2	4	4	5	5	5	1	5	3	45	3
1088	140	45.3	10	F	OW	632	125	14.25	4	4	5	1	1	4	5	3	5	5	4	3	44	2
1089	128	29	9.4	F	NW	620	105	15.05	4	3	4	5	2	4	3	4	3	4	5	4	45	3
1090	140	26.3	10.6	F	UW	704	154	12.84	5	3	3	3	4	4	5	3	4	5	3	4	46	3
1091	149	37	10.5	F	NW	680	140	14.23	4	3	3	2	4	4	4	3	3	5	4	4	43	2
1092	138	37	10.9	F	NW	530	128	12.75	4	3	2	3	5	5	5	4	3	5	5	5	49	3
1093	130	21	9.3	F	UW	619	128	12.56	4	4	3	4	5	4	3	3	4	5	4	4	47	3
1094	125	22.2	8.4	F	NW	616	116	14.67	3	3	3	3	4	4	3	3	4	5	4	4	43	2
1095	118	23	6.9	F	NW	522	123	14.53	4	3	3	2	2	4	3	4	3	4	4	4	40	1
1096	145	40	9.4	F	NW	675	110	13.6	4	3	2	1	2	3	2	4	2	4	2	3	32	1
1097	116	23	7.7	F	NW	573	115	16.07	4	4	3	3	3	3	3	4	3	4	4	3	41	2
1098	137	30	10.3	F	NW	618	109	15.73	4	4	4	5	5	5	5	4	4	5	4	4	53	3
1099	146.5	39	10.5	F	NW	791	140	13.38	2	3	4	3	5	3	2	3	5	5	4	4	43	2
1100	133	29	10.1	F	NW	664	155	12.46	5	5	5	5	5	5	5	5	5	5	5	5	60	3
1101	152	53	10	F	OW	649	153	12.26	5	5	5	5	5	4	5	4	4	5	5	5	57	3
1102	153	41	9.8	F	NW	684	132	14.04	3	4	3	5	2	3	3	3	5	3	4	3	41	2
1103	133	30	10.9	F	NW	583	133	13	4	3	3	2	4	5	5	3	3	4	5	4	45	3
1104	150	34	11.2	F	NW	622	118	12.96	5	4	5	4	3	5	5	4	5	4	5	5	54	3
1105	140	33	10.1	F	NW	645	146	13.64	5	4	4	1	3	4	4	4	5	4	5	5	48	3
1106	117	20	6.5	F	NW	500	80	20.38	5	3	3	4	1	3	1	3	3	3	3	3	35	1
1107	120	26	6.9	F	OW	480	96	16.06	4	4	3	1	1	3	3	4	3	5	5	5	41	2
1108	131.5	34	7.8	F	OW	514	90	17.52	4	5	4	4	5	4	5	4	4	5	5	5	54	3
1109	124.5	22	7.5	F	NW	570	96	14.02	5	5	5	1	1	5	4	5	5	5	4	5	50	3
1110	152	49	11.1	F	OW	640	152	12.6	5	2	4	2	4	4	3	3	4	4	4	3	42	2
1111	130	29	8.2	F	NW	461	103	16	5	5	4	1	1	1	1	5	5	5	5	5	43	2
1112	139	36	9.3	F	NW	610	106	14.7	5	5	5	5	4	5	5	5	5	5	5	5	59	3
1113	133.5	39	9.6	F	OW	482	120	14.03	4	4	4	4	3	4	4	3	4	5	4	4	47	3
1114	138	36	9.9	F	NW	677	112	14.17	4	4	5	2	3	3	3	5	4	4	1	1	39	1
1115	142	40	10.3	F	NW	743	139	12.6	4	4	4	4	4	4	5	5	5	4	4	5	52	3
1116	133	33	10.3	F	NW	660	102	13.8	5	5	4	4	4	5	5	5	4	5	5	5	56	3
1117	133.5	29	7.3	F	NW	502	124	15.13	4	5	4	5	3	5	5	5	5	5	5	5	56	3
1118	155	42	10.8	F	NW	692	131	12.65	5	4	4	5	5	5	4	5	5	4	5	4	55	3
1119	145	34	10	F	NW	746	133	13.11	5	2	3	3	4	5	5	4	5	4	3	4	47	3
1120	116	21	8.2	F	NW	440	80	20.16	2	1	1	1	1	2	1	1	3	2	2	2	19	1
1121	129	26	8.1	F	NW	486	93	16.54	5	5	5	1	1	1	1	5	5	3	5	3	40	1
1122	126	26	6.9	F	NW	598	99	17.2	4	5	3	1	1	4	5	4	2	5	4	5	43	2
1123	117	20	6.7	F	NW	482	103	15.25	4	4	4	4	5	5	5	5	5	5	5	4	55	3
1124	132	30	7.3	F	NW	560	92	15.8	5	4	5	5	4	4	4	5	3	4	5	5	53	3
1125	141	28	10.2	F	UW	702	134	12.28	4	3	2	4	3	4	4	3	4	3	4	3	41	2
1126	127.5	30	7.8	F	OW	570	88	18.82	3	2	2	1	5	2	2	3	2	4	5	4	35	1
1127	141	39	8.3	F	OW	640	137	14.35	4	4	3	1	4	4	4	3	4	4	3	3	41	2
1128	127	27	8.4	F	NW	640	115	13.11	5	4	3	3	3	4	4	3	4	4	3	4	44	2
1129	136	32	9.7	F	NW	751.8	117	13.96	5	4	4	3	4	5	4	5	4	5	4	5	52	3
1130	120	18	6.8	F	UW	560	117	14.82	5	5	5	4	5	4	3	4	5	5	4	4	53	3
1131	129	25	8.4	F	NW	660	126	15.14	4	3	3	4	4	4	4	4	4	4	3	4	45	3
1132	118	26	8.6	F	NW	518	116	15.99	5	3	5	1	1	1	1	3	5	5	5	5	40	1
1133	123	23.6	7.5	F	NW	666	113	13.3	3	5	4	3	3	4	4	3	4	4	5	5	47	3
1134	136	38	10.6	F	OW	594	124	13	5	4	4	1	5	5	5	5	5	5	5	5	54	3
1135	133	31	8.8	F	NW	540	144	11.4	5	5	4	5	4	5	5	5	5	5	5	5	58	3
1136	129	27	6.3	F	NW	624	81	18.03	5	2	4	5	3	5	5	4	3	5	5	5	51	3
1137	135	30.2	10.4	F	NW	771.7	162	12.07	5	4	5	5	5	4	3	5	4	5	4	5	54	3
1138	131	35	8	F	OW	564	100	15.99	4	3	3	3	4	5	4	5	4	3	3	3	44	2
1139	151	43	10.4	F	NW	666	150	11.75	4	2	3	2	5	4	2	1	4	4	3	2	36	1
1140	131.5	38	9.5	F	OW	583	145	13	4	4	4	1	5	5	5	4	4	5	4	4	49	3
1141	152	44.5	9.8	F	NW	700	100	14.09	5	4	4	3	5	2	3	2	5	3	5	3	44	2
1142	118	20	7.6	F	NW	566	98	15.58	5	4	3	4	4	5	4	5	4	5	5	5	53	3
1143	134	28	7.9	F	NW	621	95	16.29	5	3	2	3	4	3	3	2	4	4	4	5	42	2
1144	130	25	8.1	F	NW	514	115	16.54	4	4	5	5	1	4	5	4	5	5	4	4	50	3
1145	157	39	10.7	F	NW	680	111	13.6	4	3	4	3	2	3	3	3	4	3	3	3	38	1
1146	161	50	11.2	F	NW	609	168	11.62	5	3	3	4	1	5	4	3	3	1	5	4	41	2
1147	122	20	6.4	F	UW	540	94	15.1	5	4	4	1	1	4	4	5	4	5	4	5	46	3
1148	132	26	8.7	F	NW	690	130	13.66	1	1	2	3	1	1	2	1	3	1	1	1	18	1
1149	151	50	10.8	F	OW	795	146	12.91	5	5	4	4	3	5	5	5	5	4	4	5	54	3
1150	129	26	7.7	F	NW	480	91	15.94	4	2	5	1	1	1	1	5	4	1	4	4	33	1
1151	119	20	6.6	F	NW	591	88	15.2	5	4	5	4	3	4	5	4	5	5	4	5	53	3
1152	145	45	9.8	F	OW	730	118	15	4	2	4	3	4	4	3	2	2	5	5	4	42	2
1153	139	40	9.3	F	OW	588	97	15.5	5	4	3	4	3	4	3	3	4	3	5	4	45	3
1154	146	37.3	10.8	F	NW	614	160	13.73	5	4	4	4	5	5	5	5	4	4	5	4	54	3
1155	120	21.9	6.6	F	NW	542	110	14.38	5	5	4	1	4	5	5	5	5	5	5	5	54	3
1156	122	25	6.8	F	NW	580	95	17	5	4	4	4	3	5	4	4	5	4	4	4	50	3
1157	134	35	8.9	F	OW	640	120	14.13	4	4	3	3	5	5	4	5	4	5	4	4	50	3
1158	131	47	8.8	F	OB	600	117	14	5	5	4	1	4	5	5	4	5	5	5	4	52	3
1159	123	32	6.3	F	OB	400	70	18.64	4	3	3	2	2	3	3	4	5	5	5	3	42	2
1160	127	29	6.7	F	OW	600	80	17.69	5	5	4	4	4	5	5	5	5	5	5	5	57	3
1161	125	24	7.6	F	NW	582	115	12.9	4	4	3	5	4	5	4	5	3	5	4	4	50	3
1162	140	48	9.4	F	OB	840	117	13.4	4	3	3	5	3	5	4	2	5	1	4	4	43	2
1163	123	22	6.9	F	NW	499	80	18.47	3	4	3	4	1	4	5	1	3	5	4	4	41	2
1164	127	28.2	10.2	F	NW	630	125	13.72	5	5	4	1	1	4	5	5	4	5	5	4	48	3
1165	116	21.8	6.8	F	NW	660	111	19.05	5	5	5	1	1	5	1	5	5	5	5	5	48	3
1166	143	34	10.8	F	NW	890	170	12.94	5	5	4	4	5	5	5	4	5	5	5	5	57	3
1167	125	33	7.6	F	OB	541	87	17.54	3	2	3	1	2	4	3	4	4	3	2	3	34	1
1168	137	34	10.4	F	NW	806	131	11.9	4	3	3	5	3	4	4	5	4	4	4	3	46	3
1169	139	37	10.5	F	NW	734	170	11.98	5	4	4	3	5	5	5	4	3	5	4	5	52	3
1170	145	34	10.2	F	NW	800	154	12.49	4	4	2	3	5	5	5	4	4	5	4	3	48	3
1171	129	25	8.4	F	NW	580	119	13.22	4	3	4	1	1	5	5	4	3	5	4	4	43	2
1172	120	31	8.1	F	OW	485	110	14.11	5	5	5	1	1	1	1	5	5	4	4	5	42	2
1173	140	45	10.2	F	OW	612	115	13.56	4	3	4	2	3	4	4	3	4	4	5	4	44	2
1174	135	30	10.4	F	NW	736	141	12.9	4	3	4	4	3	3	4	4	5	4	4	4	46	3
1175	120	25	6.3	F	NW	536	114	14.45	5	4	3	5	3	5	5	3	2	4	5	4	48	3
1176	159	40	10.8	F	NW	753	150	12.09	4	3	3	1	3	5	5	4	5	5	4	3	45	3
1177	148	46	10.3	F	OW	670	132	11.46	5	5	4	4	5	5	4	4	5	5	5	5	56	3
1178	125	25	7.3	F	NW	324	115	14	4	4	3	1	2	5	5	4	3	5	5	5	46	3
1179	126	26	8.1	F	NW	612	116	13.8	5	4	4	5	5	4	5	5	4	5	4	5	55	3
1180	133	26	8.9	F	NW	752	110	17.2	5	5	4	1	5	4	1	5	5	5	5	4	49	3
1181	126	46	6.8	F	OB	480	115	18.67	4	2	3	1	1	1	2	4	2	5	5	2	32	1
1182	124	35	7.9	F	OB	630	102	14.5	5	4	3	5	3	5	4	4	5	5	5	5	53	3
1183	154	39	10.9	F	NW	672	126	14	3	2	3	2	3	4	4	3	5	4	4	3	40	1
1184	120	22	7.8	F	NW	620	130	12.7	5	4	3	4	2	3	5	4	5	5	5	5	50	3
1185	122	22	9	F	NW	640	111	13.34	5	3	4	3	5	4	5	4	4	4	5	3	49	3
1186	150	63.4	10.8	F	OB	546	158	14.71	3	4	3	3	5	4	4	3	3	3	4	3	42	2
1187	142	51.2	10.4	F	OB	683	120	14.35	5	4	4	2	5	4	5	5	3	4	4	5	50	3
1188	134.5	27.9	9.4	F	NW	710	131	12.43	3	4	2	3	4	4	4	3	3	5	4	2	41	2
1189	130	24.5	7	F	NW	606	93	14.24	5	3	4	1	2	3	2	4	5	3	5	3	40	1
1190	140	39	10.5	F	NW	706	125	13.66	5	4	4	5	5	5	5	3	5	5	4	4	54	3
1191	108	15	6.3	F	UW	489	80	18.28	4	4	4	4	3	4	3	4	3	4	4	4	45	3
1192	153	52	11.1	F	OW	714	150	12.78	5	4	4	5	4	4	3	5	4	4	5	5	52	3
1193	116	23.3	6.8	F	NW	508	98	21.09	5	5	5	5	4	5	4	5	5	5	2	5	55	3
1194	128	25.9	7	F	NW	614	118	16.32	5	5	5	1	1	5	1	5	5	5	5	5	48	3
1195	124	28.6	6.5	F	OW	514	106	17.87	5	1	5	1	5	5	1	5	5	5	5	1	44	2
1196	123	24	8	F	NW	655	118	15.18	5	4	4	3	3	4	5	5	4	5	5	5	52	3
1197	158	55	11.1	F	OW	538	125	13.12	5	4	4	4	5	5	5	5	4	4	5	5	55	3
1198	147	33	9.8	F	NW	876	138	11.8	5	4	4	4	5	5	5	5	5	5	4	4	55	3
1199	133	24.5	9.3	F	UW	639	108	15.39	4	5	3	1	1	5	4	4	4	4	4	4	43	2
1200	138.5	30	9.6	F	NW	750	116	13.57	3	3	3	4	4	4	2	3	4	4	3	4	41	2
1201	124	20.4	7.3	F	UW	560	124	18.35	3	3	4	3	3	4	5	4	4	3	4	4	44	2
1202	113	18	6.8	F	NW	592	87	16.5	4	4	3	5	5	4	4	5	4	5	3	4	50	3
1203	145	34.5	11.2	F	NW	630	116	13.47	5	5	5	4	4	5	5	4	4	4	5	5	55	3
1204	151	44	11.3	F	NW	692	142	13.11	5	5	4	4	5	5	5	4	5	5	4	4	55	3
1205	132	29	9.3	F	NW	600	142	15.5	5	4	5	3	2	5	4	5	5	5	4	4	51	3
1206	136	44	11.3	F	OW	720	146	11.5	5	2	2	1	5	4	4	2	4	5	3	3	40	1
1207	132	27.8	9.3	F	NW	658	138	15.61	4	3	5	1	4	3	3	5	4	4	4	3	43	2
1208	112	18	6.6	F	NW	572	124	16.06	4	4	4	4	4	4	4	4	4	4	4	4	48	3
1209	142	55	9.7	F	OB	534	90	14.21	1	1	2	3	4	2	3	4	1	3	4	2	30	1
1210	135.8	24	10.7	F	UW	666	125	13.61	5	4	5	5	4	4	5	4	3	4	5	5	53	3
1211	124	23	7.7	F	NW	588	132	15.57	5	3	3	1	5	5	5	5	5	5	5	5	52	3
1212	133	29	9	F	NW	566	145	13.88	5	4	2	3	1	4	3	4	3	3	4	5	41	2
1213	141	36	11.2	F	NW	645	122	14.32	4	2	3	4	5	5	4	4	4	5	4	4	48	3
1214	123	21.9	8.8	F	NW	681	127	14.57	4	3	4	5	4	5	3	4	3	5	5	5	50	3
1215	118	20	7.7	F	NW	582	87	18.16	5	4	3	1	1	4	4	4	4	5	5	5	45	3
1216	113	21	6.3	F	NW	498	107	14.5	5	4	5	5	5	5	5	5	5	5	5	5	59	3
1217	137	32	9.6	F	NW	670	114	14.25	4	5	3	4	3	4	5	4	3	5	5	4	49	3
1218	149	46	10.4	F	OW	786	118	13.3	5	4	3	3	3	5	4	3	3	4	4	3	44	2
1219	132	26	10	F	NW	652	150	15.53	3	1	4	5	5	5	3	5	2	5	4	4	46	3
1220	135.5	29	9.7	F	NW	691	140	13.06	4	5	5	4	5	5	5	4	5	5	5	4	56	3
1221	140	34	9.4	F	NW	666	125	14	5	4	4	4	4	4	5	4	3	5	4	5	51	3
1222	153	59.9	11.2	F	OB	612.5	86	15.78	4	3	3	5	4	4	3	5	5	2	3	3	44	2
1223	116	21	6.3	F	NW	552	95	17.28	3	4	4	3	3	4	4	5	5	5	5	5	50	3
1224	137	29	10.9	F	NW	660	141	11.81	2	2	2	3	1	2	3	2	3	2	3	2	27	1
1225	130	28	8.8	F	NW	749	125	13.6	5	4	3	3	4	2	3	4	5	4	5	4	46	3
1226	132	35.7	8.5	F	OW	632	103	15.57	4	3	4	4	5	4	3	4	3	4	4	5	47	3
1227	136	43	8.7	F	OB	618	115	14.99	5	4	4	5	3	4	4	3	5	5	4	4	50	3
1228	138	32	11.1	F	NW	746	128	13.21	4	3	2	2	4	3	4	3	2	3	3	4	37	1
1229	147	46	11.3	F	OW	800	120	13.4	4	5	5	5	5	5	5	5	5	5	5	5	59	3
1230	145	35	11.2	F	NW	661	131	12.1	5	3	1	2	5	4	4	4	1	1	5	4	39	1
1231	112	17	6	F	UW	560	92	14.6	5	2	2	2	1	2	1	4	5	5	5	5	39	1
1232	126	28	8.3	F	NW	530	129	14.75	3	3	5	1	1	1	1	3	5	5	3	5	36	1
1233	135	31	7.5	F	NW	720	146	11.8	3	4	5	5	5	4	3	3	5	4	5	4	50	3
1234	135	39.8	9.9	F	OW	536	136	15.56	3	4	3	1	2	2	3	4	2	2	2	3	31	1
1235	132	27	7.3	F	NW	620	100	14.2	5	4	3	3	1	1	1	4	4	5	4	4	39	1
1236	129	24	7.5	F	NW	200	125	13.82	5	4	5	5	4	5	4	5	3	5	5	5	55	3
1237	110	18.3	7.1	F	NW	480	103	15.41	2	2	3	3	3	3	4	4	5	3	4	3	39	1
1238	152	45	11.1	F	NW	700	105	14	4	3	2	4	4	3	3	3	4	5	4	4	43	2
1239	141	39	10	F	NW	738	145	12.9	4	3	4	3	4	4	3	3	5	4	4	3	44	2
1240	130	26.9	10.3	F	NW	556	153	13.8	5	3	4	1	3	5	4	4	5	4	5	5	48	3
1241	134	26	9.2	F	NW	665	112	13.79	5	3	4	5	4	4	5	4	5	4	4	3	50	3
1242	142	34	9.8	F	NW	676	132	13.69	5	5	4	5	4	5	5	5	5	5	5	5	58	3
1243	113	18.2	6.4	F	NW	545	118	16.6	5	5	5	1	1	5	1	1	5	5	5	5	44	2
1244	132	30	8.9	F	NW	683	117	13.2	4	4	4	4	4	4	4	4	4	4	4	4	48	3
1245	145	31	11	F	UW	566	162	12.34	4	5	4	3	5	5	4	5	4	5	4	5	53	3
1246	156	47	11.2	F	NW	780	135	10.5	5	4	4	4	5	4	4	4	5	4	5	4	52	3
1247	126	31	7.7	F	OW	595	110	15.31	3	4	3	1	1	4	3	4	5	4	3	5	40	1
1248	144	44	9.8	F	OW	620	76	15.87	5	4	4	3	3	5	5	4	3	5	4	5	50	3
1249	140	33	10.8	F	NW	763	143	13.4	5	3	4	4	4	5	5	4	5	4	4	4	51	3
1250	126	26	7.6	F	NW	730	153	15.02	4	5	5	5	4	5	4	5	3	5	4	5	54	3
1251	149	42.9	9.3	F	NW	657	110	14.9	4	3	2	5	3	4	5	4	2	4	4	5	45	3
1252	119	22	7.7	F	NW	570	104	15.02	5	5	5	3	3	5	3	5	5	5	5	5	54	3
1253	133	26.9	8.8	F	NW	562	143	14.52	5	5	5	1	5	4	4	5	5	5	5	5	54	3
1254	152	40.6	11	F	NW	680	159	14.09	5	3	3	3	2	3	2	2	4	3	3	4	37	1
1255	123	24	7.6	F	NW	546	81	16.44	5	4	4	3	1	4	3	3	4	4	4	4	43	2
1256	133	37	10.3	F	OW	652	120	13.05	3	3	2	4	4	3	3	4	3	4	4	4	41	2
1257	129	32.6	7.5	F	OW	594	137	13.72	5	3	3	1	1	5	5	4	3	5	5	4	44	2
1258	119	27	6.3	F	OW	620	93	15.6	5	4	4	2	2	3	2	4	3	4	3	4	40	1
1259	124	23.8	7.9	F	NW	565	90	17.67	4	5	4	4	3	5	3	5	5	3	5	5	51	3
1260	134	30.4	7.1	F	NW	388	93	18.45	4	3	3	1	1	4	4	3	4	5	5	5	42	2
1261	112	19	7	F	NW	550	87	15.61	3	4	3	2	2	3	3	4	3	4	4	4	39	1
1262	138	29	10.8	F	NW	763	164	10.9	5	4	4	3	4	5	5	5	4	5	4	4	52	3
1263	143	32	10.6	F	NW	560	150	13.16	5	4	4	3	3	5	5	4	5	4	5	5	52	3
1264	121	25	6.3	F	NW	560	75	15.7	5	2	4	2	1	1	1	4	1	5	5	5	36	1
1265	146	46	10.2	F	OW	488	95	16.52	5	5	5	1	1	5	4	4	5	5	5	5	50	3
1266	114	18.9	6.8	F	NW	634.3	109	15.09	4	5	3	5	5	5	4	4	5	5	5	4	54	3
1267	156	46	10.8	F	NW	580	160	14.39	3	3	4	3	3	3	3	4	3	3	4	4	40	1
1268	136	27.4	10.1	F	NW	629	118	14.35	4	5	3	3	2	5	5	5	1	5	3	5	46	3
1269	160	39	11	F	NW	590	115	12.94	4	4	2	3	4	3	4	5	2	4	5	4	44	2
1270	123	22	7.9	F	NW	540	135	13.65	5	4	5	5	5	5	5	5	5	5	4	5	58	3
1271	146	32	11.3	F	UW	667	144	12.34	5	4	4	4	5	4	5	4	4	4	4	4	51	3
1272	155	61	11.1	F	OW	708	151	11.1	5	4	3	3	5	4	4	5	3	4	3	5	48	3
1273	134	30	11.1	F	NW	717	140	12.44	4	3	3	3	4	5	5	5	3	5	3	4	47	3
1274	134	40	7.8	F	OB	426	76	17.47	5	5	4	4	4	5	5	5	3	4	5	4	53	3
1275	150	39	11.1	F	NW	540	182	11.41	4	4	3	3	2	4	4	4	2	5	4	4	43	2
1276	122	25.1	7.3	F	NW	465	105	16.28	4	5	4	1	4	5	5	4	5	4	3	4	48	3
1277	123	24	8.1	F	NW	598	107	14.39	4	4	3	1	1	4	4	5	4	5	5	5	45	3
1278	116.5	15	7.7	F	UW	502	138	15.31	3	2	2	3	4	5	3	2	3	4	5	4	40	1
1279	135	45.2	10.8	F	OW	661.1	139	15.24	4	4	3	3	5	5	4	5	5	5	5	4	52	3
1280	141.7	35.9	10.9	F	NW	744	139	13.79	4	4	4	5	4	5	5	4	3	5	5	4	52	3
1281	150	41	11.2	F	NW	784	185	11.7	5	4	4	4	5	4	3	4	5	4	4	5	51	3
1282	111	20.2	7.6	F	NW	596	135	14.11	4	5	4	1	4	4	3	3	5	4	4	4	45	3
1283	142	37	10.6	F	NW	770	189	9.8	5	4	4	3	5	5	4	4	4	5	5	5	53	3
1284	131	27	8.1	F	NW	624	125	13.47	5	5	5	1	5	5	5	5	5	5	5	5	56	3
1285	156	57.6	11.1	F	OW	624	110	13.45	5	5	4	3	5	4	4	4	3	5	4	4	50	3
1286	139	36	10.8	F	NW	783	175	11.1	4	5	4	4	5	5	5	4	5	4	5	4	54	3
1287	127	24	7.6	F	NW	565	130	13.79	3	2	2	1	1	3	2	3	2	3	3	3	28	1
1288	136	35	9	F	NW	631	123	14.72	5	4	3	4	1	3	4	5	1	4	5	5	44	2
1289	133	33	9.1	F	NW	661	122	13.4	4	5	5	4	5	5	5	5	5	5	5	5	58	3
1290	132	29	10.6	F	NW	546	145	12.1	3	3	1	2	4	3	4	2	2	4	4	4	36	1
1291	130	24	9.2	F	UW	800	134	13	5	4	5	5	4	5	5	5	4	5	4	5	56	3
1292	121	26	7.2	F	OW	487	89	16.06	5	5	3	1	1	1	1	5	5	5	3	3	38	1
1293	152	54	11.3	F	OW	661	121	13.43	5	4	4	3	3	4	4	4	4	4	4	4	47	3
1294	144	31.3	11.3	F	UW	638	138	15.67	4	4	5	5	4	5	4	5	5	4	4	5	54	3
1295	122	24	7.1	F	NW	552	87	15	4	5	4	5	3	5	4	5	5	5	5	5	55	3
1296	160	52	11.2	F	NW	695	135	13.7	4	3	4	4	4	4	5	4	5	4	3	3	47	3
1297	133	24.5	9.3	F	UW	737	126	12.84	4	3	4	4	3	3	4	3	3	4	4	4	43	2
1298	122	23	8.3	F	NW	612	123	14.81	4	4	4	1	1	1	1	5	4	1	1	5	32	1
1299	134	28.3	9.9	F	NW	386	108	15.37	3	4	4	1	1	4	4	4	4	5	5	5	44	2
1300	137	30	8.7	F	NW	625	98	14.5	3	4	3	3	3	5	3	2	4	3	5	4	42	2
1301	142	40	11	F	NW	632	140	12.21	5	4	4	4	4	5	4	5	4	4	4	4	51	3
1302	132	26	9.3	F	NW	687	136	14.28	4	3	3	5	4	3	4	3	4	4	4	4	45	3
1303	136	36	9.9	F	NW	500	109	14.47	4	4	5	3	4	5	5	4	5	4	5	4	52	3
1304	120	28	7.3	F	OW	554	85	15.8	4	3	4	1	1	4	4	3	4	3	5	5	41	2
1305	154	45	10.7	F	NW	793	182	10.57	3	3	3	2	4	4	4	3	4	3	4	3	40	1
1306	145	34.7	11.2	F	NW	596	155	13.38	3	2	2	3	2	3	3	2	1	2	3	1	27	1
1307	124	30.3	6.6	F	OW	530.5	84	17.33	5	5	4	2	1	5	5	3	4	5	5	5	49	3
1308	139	33.3	8.7	F	NW	711	139	12.33	3	2	3	3	2	4	3	5	4	4	4	3	40	1
1309	124	20	7.7	F	UW	515	115	16.7	4	3	4	4	4	4	5	5	3	5	4	5	50	3
1310	139.5	30	10.2	F	NW	700	100	14.13	2	1	2	3	2	3	3	4	1	1	3	2	27	1
1311	120	26	7.2	F	OW	542	140	12.9	3	3	3	4	3	3	4	4	4	4	4	4	43	2
1312	135	27	7.8	F	NW	493	100	14.59	3	3	3	4	3	4	3	4	3	3	3	4	40	1
1313	117	23	6.6	F	NW	550	69	18.8	4	4	4	1	1	5	5	5	5	5	5	4	48	3
1314	130	24	9.4	F	UW	700	142	13.22	5	4	4	5	5	5	5	5	4	5	5	4	56	3
1315	124	30	8	F	OW	547	100	15.71	4	4	4	4	4	4	4	4	4	5	5	4	50	3
1316	115	19.4	7.8	F	NW	560	116	16.6	5	3	4	1	1	4	4	4	4	5	5	5	45	3
1317	129	32	7.6	F	OW	766	113	13.7	5	4	3	4	3	5	5	4	3	4	4	5	49	3
1318	128	36	6.9	F	OB	610	63	16.7	4	4	3	3	5	5	5	3	4	5	5	4	50	3
1319	151.5	40	11.1	F	NW	690	165	12.51	4	5	3	5	5	5	5	4	4	5	5	5	55	3
1320	145	36	9.8	F	NW	645	128	13.17	4	3	4	5	4	4	5	3	5	4	5	5	51	3
1321	132	29	7.7	F	NW	528	122	17.97	3	2	2	1	1	3	3	5	4	5	5	4	38	1
1322	142	30	9.4	F	NW	555	142	12.28	4	4	3	3	3	4	4	4	4	4	4	5	46	3
1323	124	19	8.8	F	UW	480	97	16.36	4	3	4	1	1	4	4	5	5	5	5	5	46	3
1324	119	22	7.6	F	NW	674	130	15.4	3	5	4	1	5	5	5	4	5	5	5	5	52	3
1325	126	29	8.8	F	NW	712	111	14.3	5	3	4	5	5	5	5	4	1	5	4	5	51	3
1326	141	37	11	F	NW	690	168	11.4	3	2	1	3	2	4	1	3	1	3	2	5	30	1
1327	134	29	9.6	F	NW	658	129	12.83	4	5	4	3	4	4	4	4	5	5	4	3	49	3
1328	123	26.8	7.8	F	NW	600	96	18.35	4	4	2	1	1	4	4	3	4	5	5	3	40	1
1329	125	29	7.8	F	OW	420	120	16	5	4	4	3	5	5	3	5	5	5	4	5	53	3
1330	120	21.5	9.3	F	NW	708	125	13.57	4	4	3	4	3	4	5	3	4	4	4	3	45	3
1331	117	20	7.7	F	NW	560	95	15.68	4	3	4	2	5	4	5	3	5	5	4	5	49	3
1332	122	20	7.9	F	UW	702	118	12.3	5	5	4	1	4	5	5	3	5	4	5	5	51	3
1333	113	20	8.9	F	NW	541	117	13.56	4	5	4	3	5	4	5	4	5	4	5	5	53	3
1334	134	36.7	8.8	F	OW	476	115	14.63	5	5	5	1	4	4	4	4	5	5	5	5	52	3
1335	130	28.3	9.1	F	NW	704	127	14.45	5	3	5	4	5	5	5	4	5	3	3	4	51	3
1336	136	32	9.9	F	NW	680	137	12.34	4	3	3	2	3	2	2	3	4	5	4	3	38	1
1337	116	20	7.1	F	NW	520	115	16.5	3	4	3	4	5	4	1	4	5	5	5	4	47	3
1338	144	54.3	10.5	F	OB	628	130	15.14	2	3	3	2	4	2	2	3	3	3	4	3	34	1
1339	131	26	7.3	F	NW	673	130	14.09	4	4	4	5	3	4	5	4	4	4	4	5	50	3
1340	135	26	7.8	F	NW	605	132	15.91	4	5	5	3	3	5	5	5	4	5	5	5	54	3
1341	139	28.7	10.3	F	NW	722.1	133	12.82	5	4	4	3	5	4	4	5	4	4	5	4	51	3
1342	129	22	8.6	F	UW	720	131	13.7	4	5	3	3	4	5	5	4	2	5	5	4	49	3
1343	148.5	34	11.3	F	NW	760	165	13.73	4	4	5	4	5	4	5	4	4	4	4	5	52	3
1344	133	27	7.6	F	NW	645	122	14.49	5	3	3	5	4	4	3	5	4	5	5	5	51	3
1345	152	43.8	11.2	F	NW	714	150	14.15	4	4	3	4	3	3	4	4	5	4	3	4	45	3
1346	125	35.3	10.1	F	OW	606.5	91	14.46	4	4	5	5	4	3	4	5	5	5	4	4	52	3
1347	126	25	8.3	F	NW	543	92	16.46	5	4	4	3	5	5	5	4	5	5	4	4	53	3
1348	144	34	11.1	F	NW	766	161	12.51	4	4	5	5	5	4	4	5	5	4	4	4	53	3
1349	125	23.5	7.7	F	NW	600	123	15.74	3	4	4	1	1	4	3	2	4	5	5	5	41	2
1350	130	25.6	9.6	F	NW	562	159	13.01	4	5	3	1	1	4	4	4	5	3	5	4	43	2
1351	125	34	7.9	F	OB	526	106	15.13	4	4	3	4	4	5	5	5	4	3	5	5	51	3
1352	137	28.8	9.7	F	NW	773	150	11.58	5	4	4	4	4	4	4	4	3	4	4	4	48	3
1353	136	31.9	9.3	F	NW	690	143	13.75	3	3	2	2	3	4	3	3	2	4	4	3	36	1
1354	126	24	7.9	F	NW	420	106	15.4	5	3	2	3	3	2	1	2	3	4	5	4	37	1
1355	127	21.8	10.4	F	UW	592	141	13.63	5	5	4	5	5	5	4	5	4	5	4	4	55	3
1356	157	43	11.2	F	NW	775	127	12.7	4	3	5	4	4	5	4	5	5	5	5	3	52	3
1357	146.5	43.1	9.6	F	OW	711	144	12.81	5	5	5	4	5	5	1	5	5	5	5	5	55	3
1358	134	29	9.4	F	NW	580	120	12.73	4	4	3	4	5	3	3	4	4	5	4	4	47	3
1359	131	24.9	6.8	F	NW	430	95	19.2	4	4	4	3	3	4	4	4	4	4	4	4	46	3
1360	128	23	8.3	F	UW	560	80	18.47	5	5	5	1	1	3	3	5	4	5	5	5	47	3
1361	133	39	9.9	F	OW	577	104	14.66	3	1	3	3	5	5	5	5	3	2	5	5	45	3
1362	141	33.3	10.3	F	NW	594	148	12.83	3	3	4	2	2	3	4	3	4	4	3	3	38	1
1363	143	29	10.8	F	UW	680	150	13.23	5	5	4	3	5	3	1	4	5	5	4	4	48	3
1364	112	20	6.5	F	NW	497	56	16.25	5	4	3	4	4	3	3	4	3	4	3	3	43	2
1365	132	28	8.9	F	NW	609	120	14.81	5	3	3	1	1	1	1	3	5	3	5	5	36	1
1366	132	26	9.9	F	NW	725	128	13.3	5	4	2	4	5	4	4	3	4	5	5	4	49	3
1367	117	20.7	7.8	F	NW	540	92	15.83	5	4	4	4	5	5	5	5	4	5	5	5	56	3
1368	128	24	7.5	F	NW	698	131	12.3	1	3	2	1	1	2	2	2	1	2	1	1	19	1
1369	138	34	8.2	F	NW	520	102	15.43	5	5	5	1	1	1	1	5	5	5	5	5	44	2
1370	136	28	9.8	F	NW	800	160	12.8	5	4	5	5	3	5	5	5	5	4	4	4	54	3
1371	125	23	8.8	F	NW	680	116	14	5	4	5	3	3	4	3	4	4	3	4	3	45	3
1372	140	30	9.8	F	NW	680	133	12.87	3	3	4	3	4	3	5	4	3	4	4	3	43	2
1373	140.5	29	10.3	F	UW	731	145	13.44	3	2	2	2	4	4	2	3	3	3	4	4	36	1
1374	122	23.4	7.8	F	NW	663	96	16.27	4	5	4	4	3	5	3	3	5	2	4	5	47	3
1375	134	31	9.6	F	NW	700	123	13.34	4	3	4	3	5	4	3	5	5	4	4	4	48	3
1376	126	25	7.6	F	NW	583	128	12.38	4	3	2	1	2	5	3	3	2	5	4	5	39	1
1377	125	28	7.6	F	NW	775	117	12.6	4	5	4	4	4	4	5	4	4	5	4	4	51	3
1378	114	20	7.2	F	NW	415	102	16.12	5	5	5	5	5	5	5	5	5	5	5	5	60	3
1379	160	48.3	11.1	F	NW	760	182	12.16	5	3	4	3	4	5	5	3	4	4	3	4	47	3
1380	121	21	6.5	F	NW	540	102	17.1	3	2	3	3	2	2	5	5	4	3	5	5	42	2
1381	133	30	8.6	F	NW	390	110	15.29	4	4	4	1	1	5	5	5	5	5	5	4	48	3
1382	119	21.8	7.8	F	NW	520	124	16.53	5	5	5	1	1	4	5	5	5	5	5	5	51	3
1383	134	27	10.8	F	UW	758	147	13.07	5	4	5	3	5	5	5	5	5	4	5	4	55	3
1384	134	40	8.4	F	OB	623	123	14.5	5	4	3	4	4	5	4	5	5	5	4	4	52	3
1385	130	30	6.6	F	OW	460	92	15.6	4	3	3	4	4	4	5	4	5	5	4	4	49	3
1386	121.5	23	7.3	F	NW	562	85	16.59	5	4	5	5	5	5	5	3	5	5	5	5	57	3
1387	121	22.1	6.8	F	NW	610	113	15.09	5	3	4	1	1	4	5	4	3	5	5	5	45	3
1388	142	34.9	10.6	F	NW	722	131	12.75	5	5	4	5	3	4	4	5	4	5	4	5	53	3
1389	124	23	9.2	F	NW	610	109	16.47	5	3	3	1	1	1	1	3	5	5	5	3	36	1
1390	149	45	10.9	F	NW	628	140	14.15	5	4	4	3	4	3	3	3	4	4	4	4	45	3
1391	133.5	25	8.8	F	UW	680	148	12.9	5	4	4	3	4	5	5	4	5	5	4	5	53	3
1392	130	23	8.1	F	UW	700	122	13.1	5	5	4	5	4	4	5	5	5	5	5	5	57	3
1393	132	40	7.6	F	OB	661	110	15.42	4	4	3	3	4	4	4	5	4	4	5	5	49	3
1394	125	24	8.6	F	NW	624	116	12.7	5	1	4	4	2	5	5	3	5	5	2	3	44	2
1395	135	38.3	9.2	F	OW	508	120	15.55	4	4	4	1	1	4	4	3	4	5	5	2	41	2
1396	121	26	7	F	OW	552	91	17.3	5	4	5	1	1	4	5	3	5	5	5	5	48	3
1397	130	36	9.5	F	OW	580	124	13.5	5	5	4	3	5	5	5	3	3	4	5	5	52	3
1398	135	36.5	8.4	F	OW	650	107	14	3	2	3	2	3	3	3	3	3	3	3	3	34	1
1399	120	17	7.8	F	UW	526	116	14.22	5	4	4	5	5	4	5	4	4	5	5	5	55	3
1400	149	39	10.6	F	NW	727	158	13.09	4	3	4	3	2	3	2	4	5	3	4	3	40	1
1401	132	38.8	7.8	F	OB	590	100	17.64	4	5	5	1	1	4	4	5	4	5	5	5	48	3
1402	127	29.9	7.3	F	OW	640	111	17.65	5	5	5	4	3	5	3	3	5	3	5	3	49	3
1403	128	25	7.4	F	NW	580	93	16.95	3	4	3	2	1	4	4	4	4	4	4	4	41	2
1404	144	31	11.1	F	UW	623	142	12.9	4	3	2	4	4	3	4	3	4	4	3	3	41	2
1405	131	26.3	8.1	F	NW	600	119	16.16	5	5	5	1	4	3	5	5	5	3	5	5	51	3
1406	134	29.4	7.5	F	NW	332	112	12.95	2	5	2	1	1	2	3	2	4	5	5	3	35	1
1407	119	20.6	6.9	F	NW	673	125	17	2	3	4	2	5	5	4	1	3	5	3	3	40	1
1408	134.5	26.5	9.2	F	NW	740	147	13.05	4	3	2	2	3	4	3	3	2	5	3	4	38	1
1409	123	24	7.1	F	NW	536	106	16	4	3	2	4	3	4	3	3	5	4	5	5	45	3
1410	124	26	7.6	F	NW	500	111	15.2	5	4	4	3	4	4	3	3	4	5	5	5	49	3
1411	131	28	9.2	F	NW	597	85	15.59	5	3	3	1	1	1	1	5	1	3	3	3	30	1
1412	145	36	10.9	F	NW	690	129	14.2	4	4	4	5	5	3	4	5	4	4	5	5	52	3
1413	134	33.1	9.7	F	NW	670	148	14.3	3	4	3	1	1	4	4	4	5	4	4	4	41	2
1414	124	27.6	9.1	F	NW	540	95	15.91	5	3	3	1	1	4	4	4	5	5	5	5	45	3
1415	127	21	7.5	F	UW	528	145	13.47	3	4	4	4	1	5	3	3	5	5	4	4	45	3
1416	122	22.6	7.6	F	NW	592	150	17.25	2	5	2	1	1	5	5	2	5	5	5	5	43	2
1417	130	29	7.4	F	NW	620	124	13.78	4	5	5	5	5	5	5	5	5	5	5	5	59	3
1418	143	39	11.3	F	NW	522	113	14.09	2	1	2	1	5	3	4	1	4	3	3	3	32	1
1419	122	25.8	7.8	F	NW	688	92	17.59	5	5	4	1	1	3	3	3	4	5	5	5	44	2
1420	130	31.6	8.5	F	OW	560	111	15.34	4	4	4	1	1	4	4	3	3	4	5	4	41	2
1421	118	22.8	8	F	NW	658	137	15.22	5	3	5	1	1	4	4	5	4	5	5	4	46	3
1422	138	31.2	9.6	F	NW	687	154	13.51	2	3	2	2	4	5	4	4	3	4	3	2	38	1
1423	143	26	9.7	F	UW	676	112	13.21	5	4	4	3	5	5	4	5	4	5	4	5	53	3
1424	142	45	10.2	F	OW	673	101	15.06	4	3	4	3	5	4	3	4	3	4	4	3	44	2
1425	136	36	9.3	F	OW	767	130	12.7	4	3	3	4	5	4	3	3	5	4	4	4	46	3
1426	124	28	7.7	F	OW	620	100	15.7	5	4	4	3	4	4	4	5	5	4	4	4	50	3
1427	140	30	7.5	F	NW	494	119	14.27	5	5	5	1	1	1	1	5	5	3	5	3	40	1
1428	123	21.9	7.6	F	NW	640	129	13.8	5	4	4	1	1	4	4	5	3	5	5	4	45	3
1429	137	38	10.7	F	NW	674	130	13.52	4	3	2	4	5	4	3	2	4	3	4	3	41	2
1430	157	52	10.5	F	OW	786	125	14	5	3	4	4	4	5	4	3	4	4	5	5	50	3
1431	119	25	7.9	F	NW	500	94	16.26	4	3	5	3	4	4	5	3	5	5	5	5	51	3
1432	122	20	7.7	F	UW	600	109	13.5	5	5	5	4	4	5	5	5	4	5	4	4	55	3
1433	155	56	10.9	F	OW	617	116	16.22	4	3	3	3	4	4	4	3	2	4	4	4	42	2
1434	124	26.7	7.3	F	NW	607	95	15.07	5	5	4	4	5	5	5	5	5	5	5	5	58	3
1435	125	25	8.5	F	NW	760	148	11.9	5	4	3	1	1	3	5	4	2	3	3	3	37	1
1436	118	21	6.9	F	NW	540	89	16.2	5	5	4	1	1	4	4	4	5	5	5	5	48	3
1437	135	28.3	9.3	F	NW	701	145	12.32	2	3	2	4	3	4	5	3	2	5	4	3	40	1
1438	140	31	10.9	F	NW	785	153	14.34	4	3	3	2	4	4	4	4	5	4	4	3	44	2
1439	116	24.5	8.7	F	NW	645	124	13.9	5	4	5	4	5	5	4	5	5	5	4	5	56	3
1440	132	25	8.2	F	NW	610	115	14.11	4	5	5	1	1	5	1	5	5	5	5	5	47	3
1441	120	21	6.3	F	NW	570	104	17.9	2	1	2	1	4	4	1	3	2	1	3	5	29	1
1442	154.7	56.8	11.1	F	OW	678	120	13.86	4	2	3	3	5	5	5	3	5	4	4	4	47	3
1443	129	30	8.1	F	NW	580	153	12.5	5	4	4	5	4	4	4	5	5	4	4	4	52	3
1444	126	26	6.5	F	NW	526	92	18.38	3	2	2	2	1	2	2	3	1	2	4	3	27	1
1445	127	26.7	8.1	F	NW	644	85	15.11	5	4	5	1	1	4	4	5	4	5	5	5	48	3
1446	122	25	6.8	F	NW	625	110	14.74	3	5	4	1	1	4	4	3	5	5	5	5	45	3
1447	147	46	9.4	F	OW	700	140	12.9	4	4	5	5	3	4	5	4	5	4	4	4	51	3
1448	134	25	8.6	F	UW	733	150	12.69	5	5	5	5	5	5	5	5	5	5	5	5	60	3
1449	136	25	9.8	F	UW	698	124	14.3	3	4	4	4	3	4	3	3	4	5	3	4	44	2
1450	121	25.2	6.5	F	NW	582.7	89	17.41	4	5	5	1	5	5	4	4	2	5	5	5	50	3
1451	122	36	7.8	F	OB	536	115	16.7	3	2	2	1	1	3	2	3	2	3	3	3	28	1
1452	130	29	7.5	F	NW	580	132	14.6	5	4	3	3	5	5	4	3	5	5	5	4	51	3
1453	115.5	18	6.7	F	UW	588	96	16.9	4	4	3	3	3	3	3	4	4	4	5	4	44	2
1454	151	44	11.2	F	NW	930	188	10.36	5	4	3	5	2	5	3	5	3	4	5	5	49	3
1455	133	32.3	9.8	F	NW	718	100	13.46	5	5	5	5	4	5	4	4	4	5	5	2	53	3
1456	133	28	7.6	F	NW	503	120	16.36	4	4	3	1	1	3	3	4	4	5	5	4	41	2
1457	126	30	7	F	OW	510	100	19.43	3	3	2	1	2	2	2	2	2	3	3	3	28	1
1458	118	19.8	6.5	F	NW	376	118	23.08	3	4	4	2	2	3	3	4	2	5	3	3	38	1
1459	122	23	6.5	F	NW	530	85	17.22	5	4	4	2	1	5	4	4	4	4	4	4	45	3
1460	115	18.1	7.1	F	UW	490	96	19.11	4	4	4	3	3	4	4	4	3	4	3	4	44	2
1461	124	30.3	7.5	F	OW	562	105	16.22	4	4	4	1	1	4	4	5	4	5	5	5	46	3
1462	143	39.4	9.3	F	NW	767	167	12.82	2	1	1	2	3	1	2	4	5	5	4	4	34	1
1463	141	47.5	10.2	F	OW	524	130	15.07	4	4	4	3	3	3	4	4	4	4	4	4	45	3
1464	115	18.4	8.4	F	UW	636	117	15.7	4	3	4	4	4	4	5	4	2	5	4	5	48	3
1465	122	24	6.7	F	NW	512	84	15.2	4	3	3	2	1	2	3	4	4	4	5	4	39	1
1466	127	25.3	7.6	F	NW	602	114	13.77	2	3	4	2	2	2	3	2	4	5	5	3	37	1
1467	117	19	6.8	F	NW	517	110	15.66	5	5	5	1	1	1	1	1	5	5	5	3	38	1
1468	134	29.1	8.6	F	NW	586	122	15.64	4	5	5	1	1	4	4	4	5	5	4	5	47	3
1469	125	25	9.1	F	NW	580	106	16.5	5	5	5	1	1	1	1	5	5	5	3	5	42	2
1470	122	21	6.1	F	NW	568	135	16.5	4	4	3	5	4	4	5	3	4	5	5	4	50	3
1471	132	26	9.3	F	NW	710	144	13.2	3	2	2	2	2	3	3	4	3	2	3	4	33	1
1472	123	25	6.8	F	NW	628	113	14.8	4	4	1	1	1	3	3	3	4	5	4	4	37	1
1473	115	18	7.1	F	UW	447	115	15.97	5	5	5	1	1	1	1	5	1	5	5	5	40	1
1474	120	23	6.7	F	NW	589	50	15.59	5	3	4	4	4	4	4	5	4	5	4	4	50	3
1475	123	25.5	8.1	F	NW	623.01	111	13.83	3	2	2	1	3	2	2	5	3	3	3	4	33	1
1476	123	25	6.8	F	NW	443	119	16.12	4	4	3	2	2	5	4	4	4	5	5	5	47	3
1477	118	25	6.6	F	OW	563	83	16.31	5	4	4	5	4	5	5	5	5	5	4	5	56	3
1478	117.5	20	6.5	F	NW	490	110	15.78	5	5	5	5	3	5	5	5	5	5	5	5	58	3
1479	138	39	9.3	F	OW	581	140	13.2	5	4	4	4	5	5	5	4	5	4	5	5	55	3
1480	122	28.2	6.8	F	OW	555	91	15.65	5	4	4	4	5	1	3	4	5	3	5	5	48	3
1481	112	21	6.6	F	NW	619	90	19.81	5	4	4	4	4	5	5	5	5	5	4	4	54	3
1482	136	34	10.3	F	NW	700	126	12.93	4	4	4	4	4	5	5	5	4	4	4	4	51	3
1483	137	35	8.3	F	NW	640	130	13.3	5	4	4	4	5	4	4	5	5	5	5	5	55	3
1484	153	59	10.9	F	OW	662	115	15.29	5	3	2	2	4	3	4	1	3	4	3	3	37	1
1485	126	24	7.8	F	NW	575	117	14.2	3	5	5	3	2	5	4	4	5	5	2	4	47	3
1486	152	52	10.6	F	OW	773	133	14.1	4	3	4	4	5	4	5	5	4	5	3	3	49	3
1487	135	31.7	9.8	F	NW	780	110	16.68	5	1	5	5	5	5	5	4	4	5	4	4	52	3
1488	148	62	9	F	OB	600	120	13.6	4	5	3	3	4	5	4	4	5	4	5	4	50	3
1489	144	35	10.1	F	NW	800	126	12.6	4	3	3	2	3	4	3	3	4	3	3	3	38	1
1490	129	30	8.5	F	NW	588	90	15.89	5	3	3	1	1	1	1	5	3	5	5	3	36	1
1491	146.5	41	11	F	NW	783	135	12.5	3	4	3	3	4	5	3	3	4	4	3	3	42	2
1492	117	19.7	6.9	F	NW	535	119	14.77	4	5	3	1	3	4	4	5	2	3	2	5	41	2
1493	141	33.2	10	F	NW	695	126	13.4	4	3	3	3	4	5	4	3	4	4	3	3	43	2
1494	146	36	11.1	F	NW	729	180	10.93	5	4	3	5	5	5	4	4	4	5	5	5	54	3
1495	152	37	10.9	F	NW	720	170	10.9	4	3	3	2	3	4	3	4	3	4	3	3	39	1
1496	138	30	8.2	F	NW	620	129	12.57	4	3	2	1	1	5	1	4	5	4	5	5	40	1
1497	119	23	6.8	F	NW	400	64	14.71	5	5	5	1	1	1	1	5	5	5	5	3	42	2
1498	153	58	11	F	OW	661	159	13.11	5	3	3	4	5	5	5	4	3	3	3	3	46	3
1499	117	22	7.1	F	NW	535	106	14.4	5	4	5	5	3	5	5	5	5	5	5	5	57	3
1500	128	24	6.8	F	NW	568	98	16.4	3	3	4	3	3	3	3	4	3	5	4	3	41	2
1501	128	26	8.2	F	NW	636	114	14.3	5	5	5	5	3	5	3	5	5	5	5	5	56	3
1502	128	23	8.1	F	NW	600	113	14.4	5	3	3	3	1	1	4	5	4	5	5	5	44	2
1503	132	25	9.1	F	NW	700	119	12.6	4	3	5	5	4	4	4	4	3	5	5	4	50	3
1504	117	21.6	6.4	F	NW	640	112	15	3	5	4	4	1	5	5	1	5	4	5	1	43	2
1505	118	20	7.7	F	NW	535	105	18.31	3	3	3	3	1	3	4	4	3	4	4	4	39	1
1506	124	30	8.4	F	OW	500	111	15.81	1	1	1	1	1	1	1	2	4	1	2	3	19	1
1507	125	24	7.4	F	NW	526	86	16.39	4	2	3	1	5	4	4	5	5	5	5	5	48	3
1508	123	23.7	7.6	F	NW	596	131	16.87	2	4	4	1	1	4	4	5	5	5	5	5	45	3
1509	132.5	25	9.3	F	UW	746	96	13.7	4	4	5	3	2	4	5	5	3	4	5	5	49	3
1510	142	34	10.3	F	NW	548	97	13.72	3	2	4	5	3	4	3	2	5	5	3	3	42	2
1511	131	25	7.3	F	NW	586	107	17.47	3	2	2	2	2	2	2	3	3	3	3	3	30	1
1512	124.5	24.5	9.3	F	NW	560	92	15.2	3	2	2	2	4	4	4	3	4	4	3	3	38	1
1513	127	30	6.5	F	OW	503	110	17.03	5	4	3	1	1	5	5	5	5	5	5	5	49	3
1514	119	21	7	F	NW	540	105	17.1	5	3	4	5	3	4	3	5	5	5	5	5	52	3
1515	117	18.4	7.3	F	UW	493.7	91	25.4	3	5	4	2	2	4	4	4	1	5	4	5	43	2
1516	124	20	7.4	F	UW	652	136	14.13	5	5	4	3	5	4	5	5	5	5	5	5	56	3
1517	123	25.6	6.4	F	NW	560	102	16.52	3	2	2	1	1	3	3	2	3	3	4	4	31	1
1518	130	25	7.3	F	NW	610	93	13.4	4	4	4	3	4	4	4	4	3	5	4	4	47	3
1519	124	39	7.1	F	OB	548	106	14	5	5	5	4	4	4	5	4	4	5	5	5	55	3
1520	127.5	27	7.5	F	NW	583	95	17.21	5	4	4	5	5	5	5	5	5	5	5	5	58	3
1521	143	30	11.1	F	UW	641	141	13.05	4	3	4	2	2	3	5	4	5	4	3	4	43	2
1522	117.5	25	7.7	F	OW	523	125	14.84	5	4	4	4	5	5	4	4	5	4	5	4	53	3
1523	115	19.3	7.7	F	NW	522	112	17.8	5	4	2	1	1	5	4	3	4	5	5	5	44	2
1524	120	22.8	6.9	F	NW	512	152	15.02	5	4	4	5	4	3	4	4	5	5	2	3	48	3
1525	144.5	32	10.3	F	NW	809	107	13.66	4	3	5	3	3	5	2	3	4	4	5	4	45	3
1526	130	23.7	10.1	F	UW	500	93	15.11	5	5	4	2	4	5	4	3	5	5	4	5	51	3
1527	127	26	8.5	F	NW	596	129	15.3	4	3	5	2	1	5	5	2	3	4	5	3	42	2
1528	144	47	11.2	F	OW	590	113	15.13	2	3	2	3	2	2	2	3	2	3	3	3	30	1
1529	125	20	7.3	F	UW	600	101	12.2	4	4	2	2	2	2	2	2	4	4	5	5	38	1
1530	130	25	7.7	F	NW	604	109	14.25	5	4	4	5	5	5	5	4	3	5	4	5	54	3
1531	145	37.8	10.8	F	NW	672	150	13.06	3	4	4	5	5	5	5	5	4	5	5	5	55	3
1532	115	24	7.2	F	OW	386	90	17.56	5	5	4	1	5	5	5	5	4	5	5	5	54	3
1533	129	33	9.9	F	NW	614	107	14.33	4	3	3	2	2	4	3	3	3	3	4	3	37	1
1534	150	44.2	10.3	F	NW	672	132	14.31	5	4	4	3	4	4	4	5	3	4	5	4	49	3
1535	135	26.5	9.8	F	UW	770	116	13.4	4	4	5	4	4	5	5	4	5	5	5	4	54	3
1536	142	47.1	9.4	F	OW	638	93	13.98	4	4	5	5	5	4	5	4	5	5	3	4	53	3
1537	151.5	45	11.2	F	NW	606	145	13.19	5	5	4	4	4	5	5	5	5	5	4	4	55	3
1538	123	26	7.1	F	NW	615	123	15.96	4	4	3	2	2	4	4	3	5	4	3	3	41	2
1539	142	32	10.4	F	NW	800	132	12.1	4	4	4	4	5	5	5	4	5	4	4	4	52	3
1540	131	26	7.8	F	NW	542	114	15.44	5	4	4	1	4	5	5	5	4	5	5	5	52	3
1541	139	40	10.9	F	NW	750	122	13.2	3	3	4	4	3	4	3	4	4	5	4	5	46	3
1542	123	26	6.6	F	NW	600	127	17.3	4	4	3	5	4	3	4	5	3	5	5	4	49	3
1543	143	34	9.6	F	NW	648	130	12.12	5	3	2	4	4	3	2	3	5	5	2	2	40	1
1544	146	35	10.3	F	NW	800	113	13.4	3	4	1	5	5	4	4	4	2	4	4	3	43	2
1545	145	38.5	10.8	F	NW	860	165	11.5	4	4	3	1	3	4	3	3	5	4	4	4	42	2
1546	133	29	7.9	F	NW	577	120	14.68	5	4	4	5	5	5	5	5	5	5	5	5	58	3
1547	122	25	6.6	F	NW	440	111	14.8	4	5	3	2	3	4	4	3	4	4	4	3	43	2
1548	146	38	11.1	F	NW	680	154	13.94	4	3	5	1	4	5	4	4	3	5	3	5	46	3
1549	145	44.2	9.5	F	OW	600	140	14.06	5	4	5	1	4	5	5	5	5	5	5	5	54	3
1550	130	27.5	7.9	F	NW	680	119	14.94	5	5	3	1	1	4	4	3	4	5	5	5	45	3
1551	128	24.1	7.7	F	NW	600	98	16.44	4	3	5	4	3	4	3	2	4	3	4	5	44	2
1552	136	41	11.3	F	OW	620	140	15.68	5	4	4	4	2	4	4	5	2	3	5	5	47	3
1553	122	21.6	7.4	F	NW	640	113	14.14	5	4	4	4	3	5	3	2	5	3	5	2	45	3
1554	157	45	10.8	F	NW	800	135	11.6	5	4	5	4	5	5	5	5	5	5	5	5	58	3
1555	120	23	7.7	F	NW	625	131	13.34	5	5	5	4	3	4	3	5	5	5	5	5	54	3
1556	129	28	8	F	NW	612	144	12.2	5	4	4	1	1	5	4	4	4	5	4	4	45	3
1557	156	45.4	11.2	F	NW	776	155	12.44	4	3	4	4	2	4	5	3	5	4	4	4	46	3
1558	142	36	10.3	F	NW	718	134	13.3	5	4	5	5	5	5	5	5	4	5	4	5	57	3
1559	143	40.1	10.3	F	NW	612	144	14.84	4	4	5	1	5	5	5	5	4	5	4	5	52	3
1560	130	29.2	9.3	F	NW	556	86	15.5	4	3	4	1	1	4	5	4	5	5	4	4	44	2
1561	117	20	6.6	F	NW	580	112	13.2	5	3	3	5	4	4	4	5	3	5	5	4	50	3
1562	123	22	7.6	F	NW	552	85	16.12	4	3	4	3	4	5	4	4	4	4	5	5	49	3
1563	120	20	7	F	NW	574	109	15.12	5	5	4	4	3	5	5	5	5	5	5	5	56	3
1564	131	22	9.9	F	UW	663	131	13.47	5	3	3	4	4	4	3	4	4	5	5	4	48	3
1565	136	38	8.6	F	OW	630	123	13.7	5	4	3	5	5	4	5	5	5	4	5	3	53	3
1566	129	25	6.8	F	NW	530	75	17.8	3	2	1	1	2	2	1	3	4	3	3	1	26	1
1567	138	40	9.9	F	OW	650	134	12.79	4	4	4	5	5	5	5	5	4	5	3	5	54	3
1568	111.5	19	7.4	F	NW	554	100	16.07	4	4	3	3	3	2	4	5	5	4	4	4	45	3
1569	136	34	9	F	NW	646	90	14.4	5	4	5	4	4	5	5	4	2	5	5	5	53	3
1570	151	34	10.6	F	NW	771	150	12.78	5	4	5	4	5	5	5	5	5	4	5	4	56	3
1571	143	45	10.3	F	OW	590	119	13.9	4	4	4	5	4	4	3	4	5	4	4	4	49	3
1572	132	31	7.9	F	NW	515	113	14.34	3	4	5	5	5	5	5	4	5	5	5	5	56	3
1573	132	32	7.8	F	OW	560	95	16	4	4	3	2	1	5	5	3	5	5	4	4	45	3
1574	136	31	8.8	F	NW	635	130	12.73	3	4	4	2	3	5	4	5	5	4	5	4	48	3
1575	127	25	10.4	F	NW	740	144	12.3	3	2	3	1	5	4	3	4	5	5	3	3	41	2
1576	130	25	9.3	F	NW	704	155	13.2	5	4	5	5	4	5	4	5	5	5	4	4	55	3
1577	121	28	6.3	F	OW	540	83	17.11	3	4	3	1	1	3	3	3	2	5	5	5	38	1
1578	144	38	10.6	F	NW	767	155	12.94	4	4	4	4	4	4	4	4	4	4	4	4	48	3
1579	148	47.1	10.8	F	OW	697.8	157	13.14	5	4	5	5	5	4	3	5	3	5	4	4	52	3
1580	138	29	10.3	F	NW	725	148	11.8	5	4	4	3	4	3	4	4	3	4	4	4	46	3
1581	131	35	8.2	F	OW	655	120	16.2	5	3	3	2	3	4	4	5	3	4	4	3	43	2
1582	134	24.2	10.3	F	UW	500	133	13.05	4	3	4	5	4	5	5	5	5	4	5	5	54	3
1583	152	46	10.8	F	NW	660	152	13.82	5	4	4	5	5	5	5	5	4	5	4	4	55	3
1584	138	35	8.5	F	NW	665	124	15.22	4	3	3	2	3	4	4	3	5	4	4	3	42	2
1585	139	36	8.4	F	NW	670	110	12.57	5	4	4	4	5	4	5	4	5	5	5	5	55	3
1586	140	30	10.5	F	NW	809	174	12.03	5	3	3	4	5	4	3	4	5	3	4	3	46	3
1587	125	20	7.5	F	UW	520	106	16.68	4	4	3	1	1	1	2	4	3	4	5	5	37	1
1588	125	28	7.3	F	NW	615	120	13.4	4	4	3	4	4	4	4	3	5	5	5	4	49	3
1589	138.5	29.5	10.2	F	NW	670	130	14.13	4	4	4	1	5	3	3	2	4	3	4	3	40	1
1590	132	31.8	8.2	F	NW	623	125	13.11	4	3	3	4	2	3	3	4	3	4	4	4	41	2
1591	131	27	7.9	F	NW	607	113	15.1	4	4	4	5	5	5	5	4	3	5	5	5	54	3
1592	123	26.3	9.2	F	NW	608	117	15.22	5	5	3	1	1	5	5	5	5	5	5	5	50	3
1593	124	23	8.7	F	NW	532	128	12.91	4	3	3	2	1	5	5	4	4	4	5	5	45	3
1594	125	29.8	8.7	F	OW	612	113	14.09	5	5	4	1	1	5	5	5	5	4	5	5	50	3
1595	141	35	9.7	F	NW	723	141	12.91	4	4	4	4	3	3	4	4	3	4	3	4	44	2
1596	127	24	7.5	F	NW	526	100	16.87	5	3	4	1	5	5	5	5	5	5	4	5	52	3
1597	140	39.3	10.1	F	OW	572	156	13.09	5	3	4	1	2	4	4	2	5	4	5	3	42	2
1598	148	62	10.2	F	OB	614	82	16.03	4	3	4	5	4	5	4	3	5	4	3	4	48	3
1599	131	43	8.5	F	OB	548	90	16.5	4	3	4	3	3	3	3	3	4	4	4	4	42	2
1600	122.5	29	6.8	F	OW	500	103	15.43	5	4	5	3	5	5	4	3	4	5	5	4	52	3
1601	123	22	6.8	F	NW	474	104	15.73	5	3	5	1	1	1	1	5	5	5	5	3	40	1
1602	137	44	9.9	F	OW	554	118	14.62	5	5	4	5	5	5	5	5	4	2	5	5	55	3
1603	128.5	28	8.3	F	NW	625	126	12.7	5	4	4	1	3	4	3	4	5	4	5	5	47	3
1604	146	47.3	10.9	F	OW	582	115	16.25	4	3	4	5	5	3	3	5	3	4	3	2	44	2
1605	121	25.4	8.1	F	NW	560	135	15.89	5	5	5	1	1	5	5	3	5	5	5	5	50	3
1606	136	32	9.4	F	NW	783	153	13.1	4	4	4	3	3	4	3	4	4	4	4	4	45	3
1607	117	23	6.6	F	NW	594	100	13.88	5	3	4	1	2	4	4	5	5	5	5	5	48	3
1608	145	34	10.1	F	NW	600	140	13.87	5	3	3	2	1	4	3	5	3	5	4	5	43	2
1609	132	31	9.8	F	NW	765	146	12.3	4	3	3	5	5	5	5	4	5	4	4	4	51	3
1610	120	24.1	7.3	F	NW	601.5	100	15.89	5	5	5	1	1	4	3	4	5	5	5	4	47	3
1611	132	31	7.3	F	NW	570	110	14.36	5	5	5	5	1	1	1	5	3	5	5	5	46	3
1612	130	31	9.8	F	NW	710	134	13.03	4	3	3	4	3	2	4	4	3	4	5	3	42	2
1613	130	29	7.5	F	NW	610	112	14.8	3	2	3	3	2	3	4	3	2	4	4	4	37	1
1614	146	46	10.8	F	OW	670	132	13.45	5	4	4	5	4	5	4	5	4	5	5	4	54	3
1615	115	19.8	6.7	F	NW	552	129	18.67	5	4	5	4	3	5	5	5	5	5	4	5	55	3
1616	112	16	6.6	F	UW	522	107	17.74	5	3	3	2	3	4	3	3	5	3	4	5	43	2
1617	121.5	25	6.9	F	NW	536	78	17.85	5	5	4	5	5	5	5	5	5	5	5	5	59	3
1618	135	35	9.5	F	NW	672	135	14.11	5	4	5	4	5	4	4	3	5	4	4	4	51	3
1619	124	22.7	7.3	F	NW	508	91	17.79	5	3	5	5	5	3	3	4	4	5	4	5	51	3
1620	139	39	8.8	F	OW	720	134	13.7	5	4	5	4	4	5	4	5	4	5	4	4	53	3
1621	140	37.8	11.1	F	NW	650	127	12.59	4	4	4	5	4	5	5	5	4	4	5	5	54	3
1622	135	25	8.8	F	UW	583	135	14.8	5	3	4	4	4	5	5	3	4	5	5	4	51	3
1623	118	22.3	8.1	F	NW	607	102	13.82	1	2	2	3	2	3	2	4	2	4	4	5	34	1
1624	118	19.9	6.7	F	NW	592	82	14.16	5	4	4	5	2	4	4	4	4	4	4	4	48	3
1625	115	20	7.5	F	NW	625	106	13.7	3	4	4	4	4	5	5	5	4	4	5	5	52	3
1626	127	26	8.1	F	NW	580	122	12.8	4	3	5	1	1	5	4	5	4	5	5	5	47	3
1627	130	30	9	F	NW	540	107	16.81	4	4	4	3	5	4	4	4	1	5	5	4	47	3
1628	115	27	6.2	F	OB	490	94	17.1	4	3	3	1	1	1	1	4	4	4	4	4	34	1
1629	118	23	6.8	F	NW	520	80	16.6	3	3	2	3	2	2	3	2	2	3	3	3	31	1
1630	127	25	7.3	F	NW	670	111	14.1	5	4	3	4	3	3	4	3	4	4	3	3	43	2
1631	119	24	6.7	F	NW	616	97	14.2	4	4	3	1	3	4	5	4	5	5	4	5	47	3
1632	144	43	11.1	F	NW	570	127	12.6	3	2	2	2	3	3	3	2	3	2	3	3	31	1
1633	145	40.6	11.1	F	NW	640	114	14.83	4	3	4	5	5	3	4	5	1	4	4	4	46	3
1634	131	33	7.4	F	OW	564	128	13.69	3	4	3	5	4	5	5	4	3	5	3	4	48	3
1635	125	24	7.8	F	NW	662	93	16.64	4	4	3	4	3	5	3	5	4	4	5	4	48	3
1636	125	21	9.2	F	UW	730	149	11.9	4	3	4	4	4	5	5	5	4	4	5	5	52	3
1637	147	35.6	10.2	F	NW	668	131	14.96	4	4	3	5	3	4	4	4	3	5	4	4	47	3
1638	138	28	9.3	F	NW	743	117	14	5	3	4	5	5	5	5	5	5	5	1	4	52	3
1639	139	29	8.3	F	NW	580	135	13.48	5	4	3	2	3	4	4	5	3	4	5	4	46	3
1640	150	54	10.9	F	OW	660	104	13.9	4	2	2	3	4	3	3	2	5	3	4	3	38	1
1641	120	25.1	6.6	F	NW	515	98	13.49	3	2	5	1	1	5	5	3	5	5	5	5	45	3
1642	127	26	7.7	F	NW	536	94	14	4	5	4	5	1	5	3	5	4	5	5	5	51	3
1643	115	18	7.8	F	UW	566	124	14.01	5	5	5	3	3	5	3	5	5	5	4	5	53	3
1644	133	31.9	10.1	F	NW	622	138	16.05	4	4	4	4	4	5	5	5	4	5	4	4	52	3
1645	144	58	11.1	F	OB	526	96	15.3	5	5	5	5	5	5	5	5	5	5	5	5	60	3
1646	127	26	6.8	F	NW	508	126	14.93	4	4	3	1	1	3	1	2	3	3	3	3	31	1
1647	126	26	8.2	F	NW	606	123	14.2	4	4	4	5	5	5	5	5	4	5	5	5	56	3
1648	119	20.6	7.3	F	NW	674.1	135	13.91	5	3	4	2	1	5	3	5	5	4	5	5	47	3
1649	131	25	8.4	F	NW	680	142	13.34	5	3	2	5	5	5	3	4	3	4	4	5	48	3
1650	134	51.1	10.1	F	OB	573.5	79	18.07	5	3	2	2	4	5	4	5	4	5	4	4	47	3
1651	130	28	9.9	F	NW	613	131	12.96	5	5	5	5	4	5	5	5	5	4	5	5	58	3
1652	119	20	6.5	F	NW	594	111	18.06	5	5	5	5	5	5	5	5	5	5	5	5	60	3
1653	127	23	8.9	F	UW	760	133	12.1	3	2	2	4	3	5	4	3	2	3	1	3	35	1
1654	144	32	8.3	F	NW	626	120	14.76	3	4	4	4	5	5	5	4	5	5	5	4	53	3
1655	120	25	7.5	F	NW	584	122	13.3	4	5	5	4	4	4	4	4	5	5	4	5	53	3
1656	129	30.3	8.8	F	NW	600	156	14.18	5	4	3	4	5	5	5	4	5	5	5	4	54	3
1657	145	39	7.9	F	OW	600	133	14.21	4	4	4	4	5	4	4	4	4	4	4	4	49	3
1658	138	33	10.6	F	NW	747	140	14.4	4	3	4	4	4	4	4	5	4	5	4	4	49	3
1659	134	31.5	10	F	NW	800	160	12.1	4	5	4	4	5	5	4	4	5	4	5	4	53	3
1660	122	23	8.8	F	NW	678	135	11.79	5	5	4	4	5	5	5	5	5	5	5	5	58	3
1661	136	30	9.8	F	NW	780	140	12.3	4	4	3	4	5	4	4	3	3	3	4	3	44	2
1662	130.5	25.5	9.3	F	NW	580	126	13.9	4	3	3	1	1	2	1	4	2	4	3	4	32	1
1663	136	34.3	9.8	F	NW	636	107	13.79	4	4	3	2	4	4	5	5	5	4	5	4	49	3
1664	124	26	8.1	F	NW	600	116	13.6	4	4	3	1	3	3	3	3	3	4	5	4	40	1
1665	150	33	8.9	F	NW	606	115	13.93	5	3	3	1	1	1	1	5	3	5	5	5	38	1
1666	113	20	7.1	F	NW	626	100	15.75	5	5	4	5	5	5	5	5	5	5	5	5	59	3
1667	135	28.5	8.6	F	NW	635	100	15.95	5	4	3	1	3	4	4	4	3	5	3	4	43	2
1668	115	22	6.4	F	NW	570	100	17.6	5	4	3	1	1	4	3	3	3	4	4	4	39	1
1669	120	23	6.7	F	NW	556	120	16.22	5	1	3	2	5	5	5	5	3	2	4	5	45	3
1670	153	45.3	10.3	F	NW	680	99	13.46	5	5	5	5	4	5	5	5	5	5	4	4	57	3
1671	136	40	9.4	F	OW	744	125	13.6	5	1	3	4	3	2	4	1	3	1	4	2	33	1
1672	137	35	8.4	F	NW	544	149	14.19	5	4	5	1	5	5	5	4	4	5	4	5	52	3
1673	128	24.6	9.6	F	NW	644	151	14.32	4	3	3	1	5	4	4	5	4	4	5	5	47	3
1674	133.5	25	9.8	F	UW	652	138	12.63	5	5	4	5	4	5	5	5	5	5	5	5	58	3
1675	126	23	8.4	F	NW	596	112	13.14	5	5	3	5	5	5	4	5	4	5	5	4	55	3
1676	121	21.9	7.1	F	NW	610.5	107	15.96	5	4	5	4	4	5	5	4	5	5	4	4	54	3
1677	128	31	7.6	F	OW	484	76	17.54	4	5	4	1	1	1	1	5	5	4	5	5	41	2
1678	122	23.7	6.6	F	NW	571.6	116	15.61	3	5	4	3	2	5	4	5	4	5	4	5	49	3
1679	119	23	9.2	F	NW	645	120	14.2	2	1	3	2	4	5	5	4	5	5	5	4	45	3
1680	138	28.8	10.7	F	NW	620	110	13.92	3	1	2	1	5	1	5	2	5	3	3	2	33	1
1681	120	23	6.6	F	NW	580	86	15.6	3	3	3	5	3	5	4	5	4	5	4	5	49	3
1682	153	39.5	11.2	F	NW	800	128	13.34	3	3	3	2	3	3	3	4	3	2	4	3	36	1
1683	123	28	7.8	F	OW	586	121	14.92	4	4	5	3	2	5	5	3	5	4	5	5	50	3
1684	116	26	7.7	F	OW	523	91	14.55	5	3	4	4	5	4	4	5	5	4	5	5	53	3
1685	130	31	9.2	F	NW	640	118	12.2	5	5	4	3	5	4	5	4	5	3	5	3	51	3
1686	109	16	7	F	UW	530	75	15.7	4	4	4	4	4	4	4	4	4	4	4	4	48	3
1687	125.5	26	6.7	F	NW	580	112	13.8	5	1	1	2	1	1	1	4	5	4	5	5	35	1
1688	154	42	10.3	F	NW	690	133	14.8	2	2	3	3	3	4	4	2	5	3	5	3	39	1
1689	146	37.5	9.8	F	NW	720	136	13.1	4	3	3	3	4	4	4	4	3	5	3	4	44	2
1690	143	30	11	F	UW	634	162	13.09	5	4	5	3	4	4	4	4	3	5	5	4	50	3
1691	125	34	7.5	F	OB	548	90	19.52	4	4	3	4	5	5	4	4	5	4	4	5	51	3
1692	128	29.3	8.5	F	NW	514	100	16.91	1	3	1	3	4	1	2	2	3	3	3	4	30	1
1693	147.5	31	10	F	UW	760	136	13.41	4	2	2	4	1	4	3	3	1	3	3	3	33	1
1694	125	25	6.8	F	NW	580	94	15.1	3	3	2	2	2	2	2	2	2	2	2	2	26	1
1695	145	32	9.9	F	NW	834	148	11.84	5	3	3	4	5	4	5	3	5	5	4	4	50	3
1696	135	33	8.3	F	NW	750	130	14.39	3	5	3	4	4	4	3	3	4	4	3	3	43	2
1697	140	39	10.7	F	NW	686	130	13.05	5	3	4	2	3	4	5	5	1	4	4	5	45	3
1698	130	23	8.5	F	UW	552	110	15.96	4	4	3	5	4	4	4	3	4	5	4	4	48	3
1699	124	24	10.2	F	NW	679	137	12.78	5	4	5	5	5	5	5	5	4	5	5	5	58	3
1700	138	35	10.3	F	NW	569	143	12.41	5	3	3	4	4	5	4	4	3	4	4	4	47	3
1701	116	26	6.3	F	OW	420	56	20	4	2	3	1	3	3	3	5	5	5	5	3	42	2
1702	154	61	11	F	OB	690	158	14.56	5	5	3	5	5	5	4	5	4	5	4	5	55	3
1703	135	31	8.5	F	NW	636	151	14.9	5	4	3	4	4	5	5	4	3	4	5	4	50	3
1704	112	20	6.7	F	NW	550	107	15.5	5	3	5	1	1	4	1	4	2	5	4	3	38	1
1705	135	30.1	9	F	NW	540	131	15.04	5	5	3	1	1	4	5	5	5	5	5	5	49	3
1706	128	23	6.8	F	NW	666	110	16.13	4	3	3	1	1	5	5	3	5	5	5	4	44	2
1707	127	25	7.4	F	NW	488	110	14	4	5	4	3	4	5	3	5	5	5	5	5	53	3
1708	137	49	9.5	F	OB	649	99	13.6	5	4	5	4	5	3	3	3	5	4	5	3	49	3
1709	129	32	7.7	F	OW	502	103	15.4	5	4	4	4	2	4	4	5	4	4	5	5	50	3
1710	136	28	11.3	F	UW	660	155	12.03	5	4	4	4	5	4	4	4	5	4	4	4	51	3
1711	156	49.2	11.3	F	NW	694.8	131	13.81	5	4	5	3	4	5	5	4	5	5	5	4	54	3
1712	129	25	7.8	F	NW	589	105	15.65	5	4	4	4	3	4	3	5	5	5	4	5	51	3
1713	120	23	7	F	NW	483	105	15.58	4	5	4	1	1	5	5	5	4	5	5	4	48	3
1714	122	21	6.4	F	NW	520	87	16.09	5	5	4	5	3	5	5	4	5	5	5	5	56	3
1715	132	36.3	8.7	F	OW	643	109	13.41	3	2	4	4	5	4	3	4	5	2	3	3	42	2
1716	130	30	7.1	F	OW	640	111	15.3	4	3	4	3	2	5	3	5	4	5	5	4	47	3
1717	126	21.6	7.1	F	UW	476	78	19.08	5	3	3	1	1	2	3	4	4	5	5	4	40	1
1718	120	20	6.8	F	NW	600	140	13.4	5	1	1	2	1	1	1	4	5	4	5	5	35	1
1719	141	38	9.8	F	NW	688	148	12.63	4	3	2	3	2	4	3	4	3	3	5	4	40	1
1720	123	33	6.3	F	OB	433	85	18.22	5	2	1	1	1	5	5	4	1	3	2	5	35	1
1721	127	30	7.5	F	OW	460	80	16.49	4	3	2	1	4	2	1	4	3	3	4	3	34	1
1722	126	26	7.8	F	NW	651	115	15.7	3	4	3	4	2	2	3	4	4	3	4	3	39	1
1723	126	26.3	7	F	NW	560	104	14.6	5	5	5	5	5	1	5	5	5	5	5	5	56	3
1724	143.5	42.7	10.5	F	OW	649	111	13.73	5	4	5	4	5	5	5	5	5	5	5	4	57	3
1725	131	24.8	9.6	F	NW	522	136	15.04	5	4	4	1	5	5	5	5	4	5	5	5	53	3
1726	140	33	10.7	F	NW	624	135	13.69	4	4	4	4	3	4	4	4	5	4	4	4	48	3
1727	141.5	37	10.8	F	NW	720	120	14.53	5	4	3	5	4	5	5	4	5	4	5	4	53	3
1728	127	26	6.6	F	NW	580	94	14.5	5	5	4	2	4	5	4	5	5	5	4	5	53	3
1729	134	27	7.8	F	NW	584	100	14.27	3	2	2	1	1	3	2	3	2	3	3	3	28	1
1730	148	46.3	11	F	OW	659.1	92	15.45	4	4	3	4	5	4	4	3	4	4	4	4	47	3
1731	150	43	10.8	F	NW	638	170	11.79	5	1	4	5	5	3	3	5	5	2	5	4	47	3
1732	132	29	8.3	F	NW	600	89	14.2	3	3	4	2	3	4	3	3	5	3	3	4	40	1
1733	123	26	7.9	F	NW	520	91	14.2	5	5	5	3	4	5	3	4	5	5	4	5	53	3
1734	151	45	10.8	F	NW	708	142	12.3	5	4	4	3	4	5	5	5	4	4	4	4	51	3
1735	114	21	6.7	F	NW	520	99	16.7	5	4	5	3	3	5	3	4	4	5	5	5	51	3
1736	112	20	6.4	F	NW	496	108	13.7	5	4	4	1	1	2	1	4	5	5	4	4	40	1
1737	124	28.2	7.4	F	OW	550	90	19.88	4	4	4	1	1	4	4	4	4	5	5	4	44	2
1738	133.5	24	10	F	UW	569	150	12.97	4	3	2	1	3	4	4	3	5	3	3	4	39	1
1739	147	39	10.5	F	NW	760	154	11.8	5	4	3	3	5	4	5	5	4	4	5	4	51	3
1740	117	19	7.3	F	UW	493	70	18.44	5	4	5	3	3	5	5	4	5	5	5	5	54	3
1741	124	25	6.8	F	NW	610	129	14.41	4	4	3	1	2	3	4	5	5	4	5	5	45	3
1742	122.5	24	8.3	F	NW	606	94	13.8	2	1	2	3	1	2	3	5	2	3	4	3	31	1
1743	119	27	6.8	F	OW	480	120	15.75	1	3	5	2	1	5	1	1	1	3	3	1	27	1
1744	122	32	8.2	F	OW	540	124	15.92	5	5	3	1	1	1	1	5	5	5	3	3	38	1
1745	127	23	8	F	NW	324	105	15.93	3	3	3	3	3	3	5	4	1	4	3	3	38	1
1746	143.5	40.2	11.2	F	NW	740	142	13.03	4	4	3	4	5	4	5	4	5	5	4	4	51	3
1747	121.5	20	7.1	F	UW	512	90	17.19	4	4	3	3	5	5	4	3	4	4	5	4	48	3
1748	150	37.6	11	F	NW	714	136	15.24	5	5	4	4	5	5	5	4	4	5	5	5	56	3
1749	129	28	8.3	F	NW	577	115	15.88	4	3	3	3	4	5	3	3	5	4	4	4	45	3
1750	144	45	10.4	F	OW	564	100	14.33	5	4	5	5	5	5	4	5	5	4	5	5	57	3
1751	128	25	8.3	F	NW	645	150	13.44	2	2	1	3	1	3	3	3	2	2	5	2	29	1
1752	159	63.2	11.3	F	OW	623	138	14.76	3	4	3	2	3	3	4	5	5	5	4	3	44	2
1753	117	20	7	F	NW	526	118	15.44	3	3	4	4	2	2	5	3	5	4	4	4	43	2
1754	123	24	6.9	F	NW	643	115	14.01	5	4	4	1	1	4	3	5	4	4	5	5	45	3
1755	124	26.8	7.3	F	NW	566	71	18.47	3	4	3	1	1	4	4	5	3	5	5	4	42	2
1756	129	28.6	7.3	F	NW	615	118	16.27	5	4	5	4	3	4	4	4	3	5	5	5	51	3
1757	126	19	7.6	F	UW	650	160	12.8	5	4	5	4	3	4	5	4	4	5	5	4	52	3
1758	140	38.5	10.8	F	NW	755	134	11.9	4	4	3	3	2	3	4	4	3	3	3	3	39	1
1759	122	24	8.3	F	NW	460	78	16.44	5	5	5	1	1	1	1	5	5	5	5	5	44	2
1760	113	23	6.8	F	OW	560	96	15.7	5	4	3	2	1	2	2	4	4	5	5	5	42	2
1761	143	42	9.8	F	OW	690	140	13.68	5	4	4	4	5	4	4	5	5	5	4	4	53	3
1762	146	29.7	10.3	F	UW	682	104	14.34	5	5	5	3	4	4	4	4	4	4	4	5	51	3
1763	122	32.1	7.6	F	OB	630	100	14.97	5	4	4	4	5	5	5	5	4	5	5	5	56	3
1764	126	25	9.5	F	NW	528	80	16.34	3	2	2	1	1	3	2	3	2	3	3	3	28	1
1765	138	40	8.7	F	OW	800	114	12.3	5	4	5	3	5	5	4	4	5	5	4	5	54	3
1766	149	35.2	11	F	NW	638	144	14.77	5	4	4	3	4	4	4	4	4	4	4	4	48	3
1767	118	22	6.4	F	NW	580	147	12.69	5	5	5	4	4	5	5	4	5	5	5	5	57	3
1768	133	32	7.7	F	OW	685	90	15.1	4	5	5	1	1	3	3	3	3	5	4	5	42	2
1769	119	27	8.1	F	OW	443	99	14.8	5	3	3	1	4	4	5	5	4	5	5	5	49	3
1770	144	45	9.8	F	OW	671	116	14.08	5	4	4	3	3	5	2	4	2	5	4	4	45	3
1771	148	37	9.7	F	NW	700	118	15.27	5	3	3	2	3	5	5	4	5	4	5	5	49	3
1772	129	24	7.2	F	NW	580	107	13.4	5	5	4	3	5	5	5	4	4	5	4	5	54	3
1773	121	20.8	7.6	F	NW	600	80	24.85	5	5	5	3	3	1	1	2	2	3	5	5	40	1
1774	126	24.1	8	F	NW	580	141	15.69	4	4	4	1	1	4	4	3	3	5	5	5	43	2
1775	121	24	7.1	F	NW	480	120	16.15	5	5	1	3	5	3	3	3	1	5	5	3	42	2
1776	128	28	7.9	F	NW	583	88	14.4	3	4	3	4	4	3	4	3	3	3	4	4	42	2
1777	132	27	10	F	NW	780	130	16.32	4	3	4	2	1	4	4	4	3	4	4	4	41	2
1778	131	34	9	F	OW	691	127	14.86	5	4	4	5	5	5	5	5	5	5	4	5	57	3
1779	131	32	7.5	F	OW	492	118	15.2	3	3	2	4	3	5	3	3	4	5	2	4	41	2
1780	127	26	9.1	F	NW	613	111	14.06	5	4	4	2	3	4	4	4	5	5	5	4	49	3
1781	143	37	10.3	F	NW	616	100	14.51	5	4	4	3	5	5	4	5	4	3	5	3	50	3
1782	141	30	11.8	F	UW	673	149	13.79	4	3	3	5	5	4	4	4	3	4	5	4	48	3
1783	140	37	8.6	F	OW	680	105	14.2	5	5	4	2	3	4	4	5	5	4	5	4	50	3
1784	124	26	6.9	F	NW	566	84	16.1	1	5	4	5	5	3	2	5	4	2	5	1	42	2
1785	123	20	7.4	F	UW	770	116	14.1	5	5	4	3	2	2	2	4	5	5	5	5	47	3
1786	125	29	8.1	F	OW	493	110	15.34	4	2	5	3	3	5	5	4	5	5	5	4	50	3
1787	134	25	9.8	F	UW	689	114	13	4	5	5	5	4	4	5	4	3	5	5	4	53	3
1788	132	32	7.8	F	OW	464	103	14.12	5	5	4	1	1	5	5	5	5	5	5	5	51	3
1789	124	25	7.3	F	NW	580	99	17.35	3	4	4	3	3	4	3	4	4	5	4	5	46	3
1790	125	28	6.8	F	OW	660	122	14.3	5	5	4	1	1	5	4	5	4	5	3	5	47	3
1791	129	27.3	9.3	F	NW	692	144	13.43	5	5	5	2	3	5	5	5	5	5	5	5	55	3
1792	130	23	8.7	F	UW	745	120	13.9	4	3	5	4	5	4	5	4	4	5	4	5	52	3
1793	116	22.8	6.9	F	NW	640	92	23.58	4	3	4	2	2	2	2	4	2	5	3	3	36	1
1794	124	31	7.4	F	OW	532	113	17.11	5	4	4	4	3	4	3	4	4	4	5	5	49	3
1795	130	28	9.3	F	NW	660	112	13.63	4	4	4	5	5	5	5	5	5	4	5	5	56	3
1796	121	23	7.8	F	NW	610	142	12.9	4	3	2	2	2	3	2	2	3	5	5	5	38	1
1797	126	25	7.5	F	NW	593	115	14.16	5	5	4	1	5	4	5	3	5	5	3	5	50	3
1798	116	17	7.4	F	UW	626	118	15.18	4	3	4	1	1	5	5	4	3	5	4	4	43	2
1799	132	37	7.2	F	OB	570	120	14.3	5	4	3	3	5	4	4	4	5	5	4	4	50	3
1800	144	45	8.7	F	OW	703	130	15.9	5	4	3	4	4	5	5	4	5	4	3	3	49	3
1801	143	27	10.5	F	UW	651.1	166	13.01	3	3	3	3	4	4	5	2	4	3	3	4	41	2
1802	126	26	7.2	F	NW	606	108	15.15	5	4	4	4	5	5	5	4	4	5	4	4	53	3
1803	119	23	7.4	F	NW	670	132	14.3	5	4	3	3	3	4	5	5	5	5	5	5	52	3
1804	129	24	7.5	F	NW	448	112	14.47	5	3	3	1	3	4	5	5	4	5	5	4	47	3
1805	118	27	6.8	F	OW	540	100	18.8	5	5	4	2	4	4	4	5	4	5	4	4	50	3
1806	126	30	7.1	F	OW	612	109	13	5	4	4	5	3	5	5	4	4	5	4	4	52	3
1807	123	31	6.8	F	OW	454	75	18.06	4	4	3	1	2	3	3	4	4	4	4	4	40	1
1808	144	40	11.2	F	NW	660	161	12.3	5	4	4	4	5	5	4	5	4	4	5	4	53	3
1809	131	27	8	F	NW	548	104	15.9	5	4	4	3	4	4	4	5	5	5	4	5	52	3
1810	134	30.2	8.2	F	NW	622	153	13.57	5	5	4	1	4	5	5	4	5	5	5	5	53	3
1811	138	27.7	9.8	F	UW	720	146	12.82	5	4	4	3	5	4	3	4	5	5	5	5	52	3
1812	135	30	8.3	F	NW	514	128	15.38	5	4	3	5	1	5	5	4	5	5	5	3	50	3
1813	126	25	9	F	NW	588	92	13.7	5	5	4	3	4	5	5	5	4	5	5	5	55	3
1814	123	23	6.8	F	NW	488	93	14.24	5	5	3	1	1	1	1	5	5	3	3	3	36	1
1815	140	35	10.4	F	NW	641	80	15.62	4	3	3	2	3	4	4	3	4	3	3	4	40	1
1816	134	26	10.6	F	UW	646	140	12.29	5	4	4	1	5	4	4	5	4	5	4	4	49	3
1817	130	30	8.1	F	NW	654	100	14.78	5	5	5	1	2	5	5	3	5	5	5	5	51	3
1818	117	26	7.8	F	OW	531	63	18.47	5	4	4	5	3	4	5	5	4	4	5	5	53	3
1819	125	26.4	8.6	F	NW	532	77	16.64	4	4	5	1	1	4	4	4	5	5	5	5	47	3
1820	123	26	6.8	F	NW	510	94	13.4	4	4	2	1	5	5	3	4	1	5	5	5	44	2
1821	140	39.4	10.8	F	NW	640	170	14.33	4	3	4	5	3	5	4	5	5	4	5	4	51	3
1822	134.5	35	10.6	F	NW	726	129	14.6	4	5	4	2	3	3	4	4	5	5	4	5	48	3
1823	115	19	6.5	F	NW	620	103	13.75	3	1	1	2	1	2	1	3	2	2	1	1	20	1
1824	133	34.9	9.5	F	OW	582	108	13.88	4	4	4	1	1	4	3	3	4	4	4	4	40	1
1825	120	23	7.6	F	NW	437	104	16.43	5	5	5	1	1	1	1	5	5	5	5	5	44	2
1826	143	32.7	10.8	F	NW	574.8	124	13.65	4	4	4	1	4	5	5	4	3	5	5	5	49	3
1827	120	22	7.3	F	NW	601	110	14.43	3	2	2	1	1	3	2	3	2	3	3	3	28	1
1828	125	29	6.3	F	OW	630	87	16.72	5	3	4	5	5	5	5	5	3	5	5	4	54	3
1829	140	32	10.8	F	NW	712	145	13.25	4	3	4	4	5	5	4	4	4	4	4	4	49	3
1830	116	19	7.6	F	NW	655	114	13.6	3	4	5	5	5	4	3	3	5	4	5	4	50	3
1831	115	21	6.9	F	NW	558	85	15.63	5	4	4	1	1	5	1	5	5	4	4	4	43	2
1832	140	33	9.7	F	NW	697	128	11.8	5	4	4	4	5	5	5	5	5	5	5	5	57	3
1833	142	41.6	10.1	F	OW	733	121	13.8	4	5	4	5	4	5	5	5	4	5	4	4	54	3
1834	137	42	11	F	OW	655	141	11.1	4	4	3	2	5	4	3	3	4	3	2	3	40	1
1835	140	47	9.7	F	OB	651	110	13.41	5	3	2	3	3	4	3	3	3	4	3	3	39	1
1836	121	25.5	9.3	F	NW	556	90	14.72	4	5	4	1	1	4	5	4	5	4	5	5	47	3
1837	149	36	10.9	F	NW	695	139	12.7	4	3	5	4	4	4	5	4	5	4	5	5	52	3
1838	126	35.7	7.8	F	OB	683.8	97	15.03	4	3	4	2	3	4	3	4	4	4	3	4	42	2
1839	133	28	7.5	F	NW	633	115	13	5	4	5	4	4	5	5	3	4	4	5	5	53	3
1840	126	25.9	7.5	F	NW	662	103	15.79	5	5	4	1	1	5	5	3	4	5	5	5	48	3
1841	129	26.9	7.5	F	NW	630	103	14.39	5	5	3	4	4	4	5	5	4	5	4	4	52	3
1842	117	19	6.6	F	NW	450	97	27.31	2	4	5	1	1	4	1	2	5	3	5	5	38	1
1843	152	44	10.4	F	NW	672	145	14.62	5	3	3	2	4	5	3	3	5	4	4	3	44	2
1844	116	21	6.5	F	NW	543	72	14.7	5	5	5	5	5	5	5	5	5	5	5	5	60	3
1845	126	25	7.5	F	NW	520	144	14.37	4	3	3	1	1	3	3	4	1	5	3	3	34	1
1846	138	33	10.8	F	NW	659	140	13.13	4	5	3	4	5	5	5	3	5	5	5	4	53	3
1847	140	27	11.3	F	UW	666	138	12.1	4	4	3	3	3	4	4	3	3	4	4	3	42	2
1848	122	29	7.3	F	OW	542	102	16.53	4	2	3	1	3	5	5	4	5	5	5	5	47	3
1849	135	30	10.7	F	NW	532	149	12.78	4	2	1	3	4	4	4	3	2	3	3	3	36	1
1850	131	28	9.3	F	NW	606	104	13.1	4	4	4	4	3	4	4	5	5	2	4	4	47	3
1851	118	22	6.8	F	NW	448	89	18.42	5	5	5	1	1	1	1	5	5	5	5	5	44	2
1852	154	38	11.3	F	NW	550	123	16.28	3	2	2	3	4	4	4	4	3	5	4	3	41	2
1853	127	30	8.4	F	NW	614	105	15.62	5	5	4	5	5	4	4	5	4	5	5	4	55	3
1854	135	25	8.8	F	UW	613	127	13.12	5	4	4	5	5	5	4	5	5	4	5	4	55	3
1855	143	44.6	9.7	F	OW	746	124	13.4	3	4	4	3	4	5	4	3	3	4	5	4	46	3
1856	150	34	11.1	F	NW	680	158	12.5	4	3	3	1	2	3	3	4	4	3	3	3	36	1
1857	128	23.4	7.1	F	NW	458	92	26.17	4	4	4	1	1	4	3	5	4	5	4	3	42	2
1858	137	29	10.3	F	NW	720	175	11.78	4	3	2	5	3	5	5	4	5	5	4	4	49	3
1859	121	24	7.4	F	NW	584	133	14.7	5	5	4	5	5	5	5	5	4	5	5	4	57	3
1860	115	23	7.8	F	NW	582	111	15.3	4	5	3	5	4	5	4	4	5	4	4	5	52	3
1861	116	22	6.5	F	NW	529	74	15.94	5	3	4	1	2	5	4	4	5	5	4	5	47	3
1862	116	21	6.4	F	NW	630	94	18.29	3	2	2	5	3	2	3	3	4	5	5	5	42	2
1863	126	26	7	F	NW	657	120	12.5	5	5	5	3	3	5	5	5	5	5	5	5	56	3
1864	139	33.1	9	F	NW	602	147	15.01	3	3	2	4	4	4	4	3	2	4	4	4	41	2
1865	124	22.3	6.6	F	NW	490	82	17.7	2	3	2	2	3	2	2	2	2	3	4	3	30	1
1866	157	58	10.8	F	OW	720	141	13.2	5	4	4	4	5	4	4	4	4	4	4	4	50	3
1867	128	22	7.9	F	UW	554	125	15.03	5	5	4	1	5	5	5	5	5	5	5	5	55	3
1868	123	23.4	8.8	F	NW	604	94	17.47	3	3	4	5	1	5	5	3	5	4	4	4	46	3
1869	139.5	33	9.6	F	NW	564	116	13.81	5	5	5	4	4	5	5	5	4	5	5	5	57	3
1870	139	35	11	F	NW	702	156	11.79	5	4	4	5	4	5	4	4	5	4	4	4	52	3
1871	141	39.7	10.5	F	NW	676	135	14.88	5	4	3	4	5	5	5	4	5	5	5	4	54	3
1872	135	31	7.8	F	NW	508	93	15.37	5	3	3	1	2	5	5	5	2	5	5	4	45	3
1873	149	49	8.9	F	OW	569	82	14.89	5	1	3	1	1	1	1	1	5	3	5	3	30	1
1874	120	21	6.9	F	NW	598	92	14.2	5	3	5	5	3	3	4	4	4	3	4	4	47	3
1875	113	17	6.3	F	UW	480	103	17.68	3	3	2	2	2	2	3	3	4	3	3	3	33	1
1876	142	40	9.4	F	OW	650	120	14.1	4	5	4	4	5	5	5	4	4	5	5	5	55	3
1877	138	28	8.3	F	NW	625	127	13.5	4	4	4	3	4	5	4	3	4	4	5	5	49	3
1878	157	41	11	F	NW	754	141	13.7	5	4	4	5	4	3	3	5	4	5	5	5	52	3
1879	117	23.6	6.8	F	NW	609	95	19.47	3	5	2	1	1	5	3	4	1	2	5	4	36	1
1880	129	23	9.8	F	UW	657	160	12.16	4	4	3	4	5	5	4	4	5	3	5	4	50	3
1881	126	27	6.5	F	NW	460	61	16.8	5	4	5	5	5	5	4	5	5	5	5	4	57	3
1882	125	23	7.8	F	NW	663	121	13.63	3	5	2	3	1	4	3	2	1	4	5	4	37	1
1883	127	25	9.4	F	NW	562	112	14.57	4	4	3	4	4	4	3	4	3	5	4	5	47	3
1884	130	30	8.8	F	NW	682	145	12.67	5	5	4	5	3	5	5	5	4	5	4	5	55	3
1885	114	17.3	6.6	F	UW	411	126	13.51	2	1	1	2	3	1	3	2	1	3	3	3	25	1
1886	138	40.9	8.2	F	OW	572	110	15.79	4	4	5	5	3	5	5	3	4	3	4	3	48	3
1887	132.5	30.3	9.8	F	NW	646	124	13.1	5	4	3	4	2	4	4	4	3	4	5	5	47	3
1888	120	21	6.7	F	NW	598	115	16.59	4	3	4	5	5	3	4	5	4	5	5	4	51	3
1889	144	39	10.1	F	NW	776	119	12.7	4	3	5	5	4	5	4	4	3	5	4	4	50	3
1890	126	24	7.4	F	NW	514	120	15.82	4	3	3	3	4	3	3	3	4	3	4	3	40	1
1891	133	36.8	8.1	F	OW	672	148	14.37	4	4	3	1	1	4	4	4	4	4	5	5	43	2
1892	120	21	7.9	F	NW	413	114	14.57	5	3	3	1	1	1	1	5	5	5	3	5	38	1
1893	135	34	9.8	F	NW	654	112	14.91	5	4	4	4	4	5	4	5	3	3	4	4	49	3
1894	122	36	7.4	F	OB	468	68	19.54	4	5	4	1	1	1	1	4	5	5	5	5	41	2
1895	137	37.6	8.8	F	OW	618	104	16.62	4	1	3	1	1	5	4	4	5	1	5	4	38	1
1896	121	22	7.8	F	NW	548	101	15.75	4	4	4	3	4	4	4	3	3	3	3	3	42	2
1897	126	23	8.8	F	NW	638	151	12.65	3	2	4	4	1	1	3	3	4	2	3	1	31	1
1898	130	43	7.8	F	OB	646	110	15.91	5	3	5	3	1	4	3	5	5	5	3	5	47	3
1899	136	26.4	8.8	F	UW	714	137	16.13	5	3	4	4	1	4	4	5	5	4	5	4	48	3
1900	126	25	7.8	F	NW	600	115	15	4	4	5	5	5	4	5	4	4	5	4	3	52	3
1901	115	16	7.1	F	UW	548	119	15.78	5	4	3	5	3	5	3	4	4	3	5	4	48	3
1902	121	24	6.7	F	NW	640	115	14.2	5	4	3	1	1	1	1	3	4	5	5	4	37	1
1903	135	34	9.8	F	NW	632	162	13.18	5	4	4	5	4	5	5	4	4	4	4	4	52	3
1904	117	22	6.7	F	NW	447	86	17.3	5	4	5	1	1	4	5	3	5	5	5	5	48	3
1905	143	31	9.6	F	NW	816	135	12	5	4	4	3	4	3	2	3	4	5	4	4	45	3
1906	130	32	9.5	F	NW	663	160	11.7	5	4	5	5	5	4	5	5	5	5	4	5	57	3
1907	138	32	10.6	F	NW	740	136	12.6	4	4	4	4	5	4	5	5	5	5	4	5	54	3
1908	133	31	11	F	NW	721	153	12.63	4	4	4	2	5	5	4	5	3	4	3	3	46	3
1909	138	43	8.6	F	OB	574	90	15.77	3	5	5	1	1	1	1	5	3	5	3	5	38	1
1910	124	22	7.3	F	NW	517	140	14.68	5	3	5	1	1	5	4	5	4	5	5	4	47	3
1911	133	26	9.5	F	NW	654	157	12.12	4	3	4	3	4	4	3	3	4	3	3	3	41	2
1912	120	20	6.9	F	NW	480	100	14.7	5	5	5	3	5	5	5	5	5	5	5	5	58	3
1913	144	42	10.9	F	NW	600	132	12.22	5	4	4	3	3	5	5	4	5	5	4	5	52	3
1914	136	32	10.6	F	NW	806	145	12.29	4	4	5	5	4	5	4	4	5	5	4	5	54	3
1915	128	29	8.5	F	NW	540	120	13.91	3	2	2	1	1	1	1	4	2	4	5	4	30	1
1916	142	30	10.5	F	NW	787	148	12.56	5	4	3	3	4	3	3	4	3	3	4	2	41	2
1917	130	30.4	9.4	F	NW	638	150	13.93	5	4	3	5	3	4	4	5	5	5	5	5	53	3
1918	125	24	6.6	F	NW	565	102	14.5	5	4	4	3	4	4	5	5	4	5	4	4	51	3
1919	155	47	11.2	F	NW	610	160	11.99	4	4	3	5	4	4	4	4	4	4	5	4	49	3
1920	120	26	8.2	F	NW	524	105	14.47	5	5	4	5	5	5	5	5	5	5	5	5	59	3
1921	133	36	7.7	F	OW	550	87	18.88	1	3	3	5	5	5	5	5	5	3	2	1	43	2
1922	135	28.9	10	F	NW	632	124	13.36	5	5	4	1	1	5	5	4	5	4	5	5	49	3
1923	138	32	10.4	F	NW	602	132	11.72	4	2	2	3	4	5	5	3	3	5	4	4	44	2
1924	130	33	8.8	F	OW	545	117	15.8	5	5	4	5	5	5	4	5	5	5	4	5	57	3
1925	127	21	7.6	F	UW	542	110	14.41	4	3	5	5	4	5	4	5	5	4	4	5	53	3
1926	120	24	7.8	F	NW	650	100	15.4	5	4	4	2	3	5	4	5	3	5	5	4	49	3
1927	123	21	8.1	F	UW	640	110	15.35	4	4	3	1	1	4	4	4	4	5	5	5	44	2
1928	147	60.2	9.9	F	OB	609	96	14.66	4	2	3	3	2	4	4	4	5	1	5	3	40	1
1929	135	35	7.8	F	OW	572	90	17.59	3	2	2	1	1	3	2	3	2	3	3	3	28	1
1930	135	33	8.2	F	NW	720	104	14	2	2	3	1	3	2	2	2	3	3	3	3	29	1
1931	129	29	7.5	F	NW	560	110	13.72	3	2	3	2	2	3	3	2	3	2	3	3	31	1
1932	132	30.7	8.8	F	NW	736	135	15.5	4	3	3	1	1	5	4	4	4	3	3	3	38	1
1933	130	25.1	9.5	F	NW	583	120	14.31	5	3	4	3	5	5	4	4	4	4	4	4	49	3
1934	136	38.3	9.1	F	OW	684	143	14.84	3	3	5	1	3	4	4	4	3	5	4	4	43	2
1935	141	30.1	8.6	F	NW	634	140	15.89	5	5	4	1	4	5	5	4	4	5	5	5	52	3
1936	131	27	8.7	F	NW	598	100	14.73	5	4	4	4	5	4	4	4	4	5	4	4	51	3
1937	124	20	8.5	F	UW	608	140	14.59	4	4	5	5	5	5	4	5	4	5	3	4	53	3
1938	144	45	9.6	F	OW	680	145	12.4	5	4	4	3	5	3	5	4	4	5	5	4	51	3
1939	122	24	7.4	F	NW	614	112	16.05	5	4	3	3	1	5	5	4	5	5	3	3	46	3
1940	122.5	19	7.5	F	UW	600	120	14.57	4	4	4	4	4	4	4	4	4	4	4	4	48	3
1941	120	30	7.5	F	OW	572	90	15.45	1	2	1	4	3	1	5	4	5	3	1	3	33	1
1942	135	28	10	F	NW	647	110	14.2	3	3	3	2	4	5	5	4	4	4	5	4	46	3
1943	122	22	6.7	F	NW	593	95	18.25	5	4	4	5	3	5	5	4	4	5	5	4	53	3
1944	149	42	10.8	M	NW	860	161	11	5	4	4	4	3	5	5	4	5	4	5	4	52	3
1945	145	36	9.5	M	NW	758	152	12.12	5	4	4	2	4	4	5	4	4	4	3	3	46	3
1946	154	33.4	11.2	M	UW	710	179	12.36	3	3	3	4	2	3	4	4	3	5	4	3	41	2
1947	125	27	6.7	M	NW	620	132	14.1	2	3	3	1	1	4	4	5	5	5	3	4	40	1
1948	121	21	7.8	M	NW	528	145	13	4	2	4	5	1	3	4	3	2	5	4	4	41	2
1949	120	20.5	6.3	M	NW	533.5	120	18.23	4	3	5	1	2	4	3	2	5	4	2	1	36	1
1950	106	17	6.3	M	NW	570	86	17	5	1	1	2	1	1	1	4	5	5	5	5	36	1
1951	139.5	39	9.3	M	OW	726	122	13.25	5	3	4	1	3	5	5	3	5	4	3	4	45	3
1952	119	22.4	7.8	M	NW	564	115	16.15	5	3	2	1	1	4	4	3	4	5	5	5	42	2
1953	142.5	34	11.2	M	NW	806	176	11.5	5	5	3	4	3	4	4	5	3	4	5	5	50	3
1954	123	23	7.6	M	NW	582	122	12.96	5	4	5	5	5	5	5	5	5	5	5	5	59	3
1955	135	25.5	10.6	M	UW	626	176	12.65	4	2	3	1	4	5	4	4	2	4	3	2	38	1
1956	119	18.4	6.3	M	UW	670	103	15.89	5	4	5	5	5	4	4	5	4	5	5	4	55	3
1957	132	32	8.2	M	NW	612	133	15.1	5	4	4	4	4	5	3	3	4	4	4	4	48	3
1958	141	32	10.7	M	NW	792	140	10.7	4	4	3	4	5	5	5	4	5	5	4	5	53	3
1959	131	25	8.3	M	NW	606	113	14.64	5	4	3	1	1	4	3	4	4	3	4	4	40	1
1960	129	37	8.1	M	OB	499	113	15.1	5	3	4	5	4	4	4	5	5	4	3	4	50	3
1961	138	31.2	10.8	M	NW	660	131	14.57	4	3	3	4	3	2	4	3	5	4	3	3	41	2
1962	144	38.2	10.6	M	NW	676	141	14.8	5	5	5	1	4	4	1	4	3	5	4	5	46	3
1963	124	27	8.6	M	NW	600	140	13.12	3	3	3	1	1	1	1	5	3	5	3	3	32	1
1964	145.5	37	10.9	M	NW	680	150	12.15	4	3	2	4	3	4	4	3	2	4	4	4	41	2
1965	113	18	7.4	M	NW	594	140	14.25	5	4	5	1	1	4	4	5	4	5	5	5	48	3
1966	132	32.4	7.7	M	OW	610	112	14.03	5	4	3	1	1	3	3	3	4	4	5	5	41	2
1967	145	29.2	11.3	M	UW	744	157	12.39	5	5	4	3	4	3	5	5	4	4	5	4	51	3
1968	132	32	8.4	M	NW	610	152	12.62	5	4	4	3	5	5	4	5	3	4	4	5	51	3
1969	150	40.5	10.5	M	NW	748.5	121	14.51	4	4	4	1	4	3	5	4	4	5	4	5	47	3
1970	123.5	23.5	10	M	NW	750	127	12	4	2	5	4	3	4	5	4	5	4	3	5	48	3
1971	139	28.1	9	M	NW	680	140	12.96	5	5	4	3	5	2	5	5	5	5	4	5	53	3
1972	149	45.1	9.6	M	OW	732	130	11.95	5	5	5	1	5	3	4	5	5	5	4	4	51	3
1973	123	25	7.5	M	NW	633	145	13.59	5	5	4	5	4	5	4	4	4	5	5	4	54	3
1974	135	26	11.1	M	UW	642	158	11.87	4	1	1	4	3	5	5	4	2	3	4	2	38	1
1975	122	26.9	9	M	NW	630.4	96	14.83	5	5	5	5	5	5	5	5	5	5	5	5	60	3
1976	127	28	10.9	M	NW	720	168	10.2	5	4	5	3	5	4	4	5	5	5	5	5	55	3
1977	123	23	6.6	M	NW	550	113	14.62	5	4	5	3	3	5	5	5	5	5	4	5	54	3
1978	143	35	10.4	M	NW	701	144	11.67	3	3	4	4	3	5	3	4	3	4	5	4	45	3
1979	110	17.3	6.4	M	NW	450	87	20.6	5	5	4	1	1	5	1	2	4	5	5	5	43	2
1980	136	26	9.8	M	UW	662	142	12.56	4	3	3	2	3	4	3	3	1	4	4	3	37	1
1981	132	26	7.5	M	NW	685	116	12.3	5	3	3	5	3	4	4	4	4	5	5	4	49	3
1982	158	79	10.8	M	OB	710	100	12.9	5	4	3	4	5	4	5	5	4	5	5	4	53	3
1983	133.5	34	8.3	M	OW	705	115	12.6	4	3	4	1	1	4	3	5	3	4	4	4	40	1
1984	136	34	8.3	M	NW	751	140	12.12	5	5	5	4	2	5	4	5	5	4	5	5	54	3
1985	145	53.2	10	M	OB	622	112	16.09	5	4	3	1	5	5	5	3	5	3	5	3	47	3
1986	138	27	9.1	M	UW	700	161	12.07	5	3	4	1	2	3	3	5	4	4	5	4	43	2
1987	118	21	6.4	M	NW	594	128	15.34	4	3	2	2	3	3	3	3	2	3	4	3	35	1
1988	142	30	10.8	M	UW	785	146	11.2	3	3	3	4	3	1	3	3	5	3	4	3	38	1
1989	146	30.8	10.1	M	UW	690	152	13.76	3	2	2	3	5	4	3	2	4	3	3	2	36	1
1990	129	25	8.7	M	NW	591	98	12.88	5	4	4	4	5	5	5	4	5	5	4	5	55	3
1991	138	36	8.3	M	OW	660	101	12.79	4	5	2	3	5	5	5	3	5	4	4	5	50	3
1992	139	39	9.6	M	OW	708	114	15.09	5	3	2	4	3	5	3	2	5	3	3	2	40	1
1993	122	26	6.4	M	NW	628	96	13.2	5	3	4	3	2	3	3	4	4	4	4	4	43	2
1994	106	19	6.3	M	NW	460	78	16	5	4	4	3	3	5	4	5	5	4	5	5	52	3
1995	139	39	10.3	M	NW	806	130	13	4	4	3	1	5	4	2	4	3	2	3	3	38	1
1996	128	27	7.9	M	NW	665	103	13	5	4	4	1	3	5	5	5	4	5	5	5	51	3
1997	115	20	6.8	M	NW	450	74	17.98	3	5	3	1	1	1	1	1	3	5	3	5	32	1
[truncated: 1,965 more rows]
